# Supplementary material for: Environmentally driven extinction and opportunistic origination explain fern diversification patterns
Source: Springer Nature journal article supplement (doi:10.1038/s41598-017-05263-7), 2017-06-30
Supplement: 41598_2017_5263_MOESM1_ESM.pdf [file 41598_2017_5263_MOESM1_ESM.pdf]

# Environmentally driven extinction and opportunistic origination explain fern diversification patterns

Samuli Lehtonen<sup>\*1,2†</sup>, Daniele Silvestro<sup>\*3,4,5,6†</sup>, Dirk Nikolaus Karger<sup>2,7</sup>, Christopher Scotese<sup>8</sup>, Hanna Tuomisto<sup>2</sup>, Michael Kessler<sup>7</sup>, Carlos Peña<sup>2</sup>, Niklas Wahlberg<sup>2,9</sup>, Alexandre Antonelli<sup>3,4,10</sup>

<sup>1</sup>Herbarium, Biodiversity Unit, University of Turku, 20014 Turku, Finland

<sup>2</sup>Department of Biology, University of Turku, 20014 Turku, Finland

<sup>3</sup>Department of Biological and Environmental Sciences, University of Gothenburg, Carl Skottsbergs gata 22B, Gothenburg 413 19, Sweden

<sup>4</sup>Gothenburg Global Biodiversity Centre, Box 461, SE-405 30 Göteborg, Sweden

<sup>5</sup>Department of Ecology and Evolution, University of Lausanne, 1015 Lausanne, Switzerland

<sup>6</sup>Swiss Institute of Bioinformatics, Quartier Sorge, 1015 Lausanne, Switzerland

<sup>7</sup>Department of Systematic and Evolutionary Botany, University of Zurich, 8008 Zurich, Switzerland

<sup>8</sup>Earth and Planetary Sciences, Northwestern University, Evanston, IL, USA

<sup>9</sup>Department of Biology, Lund University, Lund, Sweden

<sup>10</sup>Gothenburg Botanical Garden, Carl Skottsbergs gata 22A, Gothenburg 413 19, Sweden

†These authors contributed equally to this work.

\***Correspondence to:** samuli.lehtonen@utu.fi or daniele.silvestro@bioenv.gu.se

## **Supplementary Information**

### **Supplementary Materials and Methods**

#### **PaleoDEMs**

The paleogeographic digital elevation models<sup>1</sup> were built on the basis of digital topographic and bathymetric datasets of the modern world<sup>2-4</sup>. These data were combined into a global dataset with 6-minute resolution. The individual grid cells were rotated to their paleopositions using the PALEOMAP Global Plate Tectonic Model<sup>5</sup>, and the modern digital topographic and bathymetric values were corrected and modified using the lithofacies and paleoenvironmental data. These data were constructed using the database of Paleogeographic Atlas Project<sup>6-8</sup> supplemented by additional lithological and paleoenvironmental records for the Permian and Jurassic<sup>9,10</sup> in combination with numerous regional and global paleogeographic atlases. The plate tectonic reconstructions<sup>11</sup> were used to model the expected changes in topography and bathymetry caused by plate tectonic events, such as sea floor spreading, continental rifting, subduction, and continental collision, as well as other isostatic events such as glacial rebound<sup>12</sup>.

#### **Fossil calibration priors for molecular dating**

##### **1. Ferns**

Hard minimum age constraint: 359 Ma. *Archaeocalamites* from Upper Devonian to Lower Permian<sup>13,14</sup> is considered as a member of the horsetail lineage<sup>15</sup> and used in several studies to constrain the first divergence within ferns<sup>16-18</sup>. We follow this practice to constrain the minimum age of crown group ferns.

Soft maximum age constraint: 407 Ma. Oldest known Euphyllophytina are from Lower Devonian<sup>19</sup>, and we used this age as the soft maximum age for the ferns.

## **2. *Equisetum***

Hard minimum age constraint: 359 Ma. *Archaeocalamites* is considered a member of the horsetail lineage<sup>15</sup> and we used their first appearance to constrain the minimum age of the *Equisetum* stem lineage.

Soft maximum age constraint: 407 Ma. We used the oldest known Euphyllophytina<sup>19</sup> as the soft maximum for the stem lineage.

## **3. *Tmesipteris***

Hard minimum age constraint: 23 Ma. The Oligocene fossil *Tmesipteris tasmanica* is lacking reproductive structures, but represents the distinctive vegetative characteristics of *Tmesipteris*<sup>20</sup>. We assigned the constraint for the crown group *Tmesipteris* because the fossil is associated with extant species having indefinite growth type<sup>20</sup>.

Soft maximum age constraint: 145.5 Ma. Whisk ferns have extremely poor fossil record (Collinson 1996), but are among the first diverging fern lineages<sup>15,17,21</sup>. In the lack of better fossil constraint we applied the beginning of Cretaceous as the soft maximum age for this node.

## **4. *Botrychium***

Hard minimum age constraint: 55.8 Ma. Fossil trophophores, sporophores and spores were assigned to the genus *Botrychium* with high confidence<sup>22</sup>. The fossil was considered remarkably similar with extant *B. virginianum*<sup>22</sup>, a species that was resolved together with *B. strictum* as the sister lineage of all other living *Botrychium*<sup>21</sup>. A detailed cladistic analysis incorporating morphological characters would be needed to verify whether *B. wrightonii* represents a crown group *Botrychium*, or a stem group. We took a conservative approach and allowed the fossil to represent the stem group.

Soft maximum age constraint: 201.6 Ma. Ophioglossales have extremely poor fossil record<sup>22</sup>, but are among the first diverging fern lineages<sup>21</sup>. The split between *Botrychium* and *Ophioglossum* have

previously been estimated to have occurred ca. 162 Mya<sup>17</sup>. Without a better judgement we applied the Triassic-Jurassic boundary as the soft maximum age for the stem lineage.

## **5. Marattiaceae**

Hard minimum age constraint: 318 Ma. Marattioid fossils are abundant from Pennsylvanian onwards, but poorly preserved specimens are known already from the Mississippian<sup>13</sup>. We assigned the constraint to the Marattiaceae stem lineage.

Soft maximum age constraint: 407 Ma. We used the oldest known Euphyllophytina<sup>19</sup> as the soft maximum for the stem lineage, as the ancestors of marattioids remain unknown<sup>23</sup>.

## **6. *Ptisana***

Hard minimum age constraint: 176 Ma. *Marattia asiatica* is here considered as a member of segregate genus *Ptisana*<sup>24</sup>. The species has sessile, deeply cut bivalve synangia with thick outer walls<sup>25</sup>, characters typical of *Ptisana*<sup>24</sup>. These characters may represent plesiomorphies rather than apomorphies<sup>26</sup>. However, Middle Jurassic *Angiopteris blackii* has free synangia and trilete spores<sup>27</sup>, which are considered to be apomorphic states<sup>26</sup>. Therefore, it appears that *Ptisana* and *Angiopteris* were separated by the end of the Early Jurassic. We constrained the *Ptisana* stem lineage to have originated by then.

Soft maximum age constraint: 318 Ma. A cladistic analysis based on morphological data suggested that the Early Permian *Millaya* may belong to crown group marattioids<sup>23</sup>. We applied the beginning of Pennsylvanian as the soft maximum age for the stem lineage, as marattioids became common during this period, but modern lineages apparently had not evolved yet<sup>23</sup>.

## **7. *Angiopteris***

Hard minimum age constraint: 172 Ma. We use the Middle Jurassic *Angiopteris blackii*<sup>27</sup> to constrain the age of the stem lineage.

Soft maximum age constraint: 318 Ma. We applied the same soft maximum age constraint for *Angiopteris* as for *Ptisana*.

## **8. Leptosporangiate ferns**

Hard minimum age constraint: 345 Ma. Tournaisian sporangia of *Senftenbergia*-type are placed in Tedeleaceae<sup>28</sup>, a group of ferns resolved as stem group leptosporangiates<sup>15</sup>. We assigned the constraint to the leptosporangiate stem lineage.

Soft maximum age constraint: 407 Ma. Oldest known Euphyllophytina are from Lower Devonian<sup>19</sup>, and we used this age as the soft maximum age for leptosporangiate stem lineage.

## **9. Osmundaceae**

Hard minimum age constraint: 271 Ma. Early Permian *Grammatopteris* is generally considered as an early member of osmundaceous ferns<sup>16,17,29–31</sup>. We assigned the constraint to the Osmundaceae stem lineage.

Soft maximum age constraint: 345 Ma. The hard minimum age of leptosporangiates was used as the soft maximum age for Osmundaceae stem lineage.

## **10. *Osmunda***

Hard minimum age constraint: 201.6 Ma. The Triassic fossil *Osmunda claytoniites* was described as remarkably similar to modern *Osmunda*<sup>32</sup>. The fossil shows medially positioned hemidimorphic leaves which are characteristic to *Osmunda* subgenus *Claytosmunda*, thus providing a minimum age for the genus<sup>32,33</sup>. We used this fossil to constrain the crown group age.

Soft maximum age constraint: 299 Ma. Members of Osmundaceae appeared first time in the Permian<sup>34,35</sup>.

### **11. *Osmundastrum***

Hard minimum age constraint: 65.5 Ma. Fossils indistinguishable from the modern *Osmundastrum cinnamomeum* are known from the Upper Cretaceous<sup>36</sup>. We assigned the constraint to the stem lineage of the clade representing two *O. cinnamomeum* varieties in our analysis.

Soft maximum age constraint: 299 Ma. The soft maximum age of *Osmunda* was applied to the stem lineage of the subgenus.

### **12. *Osmunda* subg. *Plenasium***

Hard minimum age constraint: 55.8 Ma. The Paleocene *Osmunda arnoldii* is very similar to extant species of subgenus *Plenasium*<sup>34,37</sup>. We assigned the constraint to the stem lineage of subgenus *Plenasium*.

Soft maximum age constraint: 299 Ma. The soft maximum age of *Osmunda* was applied to the stem lineage of the subgenus.

### **13. *Todea***

Hard minimum age constraint: 136 Ma. Phylogenetic analysis combining morphological data and *rbcL* sequences resolved the fossil species *Todea tidwellii* as a member of *Todea*<sup>35</sup>. *Todea* and *Leptopteris* are morphologically readily distinguishable and strongly supported as each others closest relatives in molecular phylogeny<sup>33</sup>, and we used this fossil to constrain the *Todea-Leptopteris* node excluding the stem.

Soft maximum age constraint: 299 Ma. Members of Osmundaceae appeared first time in the Permian<sup>34,35</sup>.

### **14. Hymenophyllaceae**

Hard minimum age constraint: 228 Ma. *Hopetedia praetermissa* is the oldest known member of Hymenophyllaceae based on its general frond morphology, indirect evidence of a filmy habit, and soral

position and morphology<sup>38</sup>. This fossil has been used to constrain filmy fern origin previously as well<sup>16</sup>. We assigned the constraint to the Hymenophyllaceae stem lineage.

Soft maximum age constraint: 318 Ma. *Hymenophyllites quadridactylites* from the Upper Carboniferous is the oldest known putative Hymenophyllaceae<sup>38</sup>, and the beginning of Pennsylvanian is used here as the soft maximum age for the stem lineage.

## 15. Matoniaceae

Hard minimum age constraint: 235 Ma. Structurally preserved sori and sporangia of *Tomaniopteris katonii* has a set of characters unique to Matoniaceae<sup>39</sup>. This constraint has been applied also in previous studies<sup>31</sup>. We assigned the constraint to the Matoniaceae stem lineage.

Soft maximum age constraint: 299 Ma. *Oligocarpia* and *Szea* from Permian to Triassic have been considered as possible stem group members of Gleicheniaceae, Matoniaceae, Dipteridaceae, or Hymenophyllaceae<sup>16</sup>. The Carboniferous-Permian boundary was used here as soft maximum age for the stem lineage.

## 16. Gleicheniaceae

Hard minimum age constraint: 99.6 Ma. Morphology based cladistic analysis resolved *Gleichenia chaloneri* as the sister of extant *Diplopterygium glaucum* (= *Gleichenia glauca*)<sup>40</sup>. However, that analysis suffered from poor taxon sampling and failed to cover the extant diversity within Gleicheniaceae. As well, their results are different from those of a previous study<sup>41</sup> and neither one of these studies is supported by the molecular results<sup>21</sup>. Better sampled morphological data matrices would be needed to verify the exact position of *Gleichenia chaloneri* and another fossil taxa, *Boodlepteris turoniana*<sup>41</sup>, within the family. However, it seems apparent that both of these fossil taxa represent members of crown group Gleicheniaceae, and following a previous study<sup>31</sup> we used the older one of them (*G. chaloneri*) to constrain the Gleicheniaceae crown group.

Soft maximum age constraint: 299 Ma. Justification as for the Matoniaceae.

### **17. *Stromatopteris***

Hard minimum age constraint: 89.3 Ma. Morphology based cladistic analyses<sup>40,41</sup> resolved *Boodlepteris* as the sister of extant *Stromatopteris*. Both of these studies suffered from poor taxon sampling and failed to cover the extant diversity within Gleicheniaceae and their topology is not supported by the molecular results. However, *Boodlepteris* and *Stromatopteris* share anatomical apomorphies not observed in other members of the family, and we follow a previous study<sup>31</sup> in using this calibration point. We applied the constraint for the *Stromatopteris moniliformis*–*Gleichenella pectinata* node.

Soft maximum age constraint: 299 Ma. The soft maximum age of the family was applied to this node.

### **18. Lygodiaceae**

Hard minimum age constraint: 168 Ma. It has been suggested that mid-Jurassic *Stachypteris* provides a minimum age for the divergence between *Lygodium* and *Anemia-Schizaea*<sup>42</sup>. Similarities in fertile structures suggests affinity with modern *Lygodium*, despite the highly different frond morphology and habit<sup>42</sup>. We assigned the constraint to the Lygodiaceae stem lineage following a previous study<sup>16</sup>.

Soft maximum age constraint: 299 Ma. Fossil evidence suggests that the second filicalean radiation, into which Lygodiaceae belongs, began in Permian time<sup>43</sup>. Carboniferous-Permian boundary is applied here as the soft maximum age for the stem lineage.

### **19. *Schizaea***

Hard minimum age constraint: 112 Ma. Fossil *Schizaeopsis* is very similar to living *Schizaea* in frond morphology, but differs in its spore morphology<sup>42,44,45</sup>. *Schizaeopsis* has been considered as the sister lineage of *Schizaea*<sup>42</sup>. The oldest known fossils are from the Lower Cretaceous<sup>45</sup>. We assigned the constraint to the *Schizaea* stem lineage.



Soft maximum age constraint: 251 Ma. Spores with a possible affinity with *Schizaea* first appear in the Triassic<sup>42</sup> and consequently we applied the beginning of Triassic as the soft maximum age for the stem lineage.

## **20. *Anemia***

Hard minimum age constraint: 136 Ma. The anatomically preserved fossils were assigned to the genus *Anemia*, and compared most closely to subgenus *Anemiorrhiza*<sup>46</sup>. *Anemiorrhiza* is the sister group to a clade comprising *Mohria* and the rest of the *Anemia*<sup>42</sup>. Because the fossil differed from *Mohria* and presented characters suggesting affinity with *Anemiorrhiza*<sup>46</sup>, we used it to constrain the basal split of *Anemiorrhiza* from the remaining clade. Further evidence to support this calibration point is provided by Cretaceous *Pelletixia*, *Ruffordia* and *Anemia* fossils which have been variously resolved within the modern *Anemia* subgroups in phylogenetic analyses<sup>42,47,48</sup>. This node was constrained as Valanginian also in a previous study<sup>31</sup>. We assigned the constraint to the *Anemia* stem lineage.

Soft maximum age constraint: 251 Ma. *Anemia* and *Schizaea* are sister groups<sup>42</sup> and we apply the same soft maximum age for both of them.

## **21. Marsileaceae**

Hard minimum age constraint: 140 Ma. Late Jurassic-Early Cretaceous *Regnellites* was resolved as a member of Marsileaceae in a cladistic analysis of morphological data<sup>49</sup>. This calibration has also been used before<sup>31</sup>. We assigned the constraint to the Marsileaceae stem lineage.

Soft maximum age constraint: 201.6 Ma. Oldest fossils possible related to Marsileaceae are Late Jurassic microspores<sup>50,51</sup>. We therefore applied Triassic-Jurassic boundary as the soft maximum age for the stem lineage.

## **22. *Marsilea***

Hard minimum age constraint: 99.6 Ma. *Marsileaceae* *phyllum mahisensis* was nested within *Marsilea* in cladistic analysis of morphological data<sup>51</sup>. Taxon sampling was poor in that analysis, but the

relationships within *Marsilea* were in accordance with the molecular hypothesis<sup>52</sup>. We assigned the constraint to the *Marsilea* stem lineage.

Soft maximum age constraint: 145.5 Ma. Based on fossil record it has been estimated that modern Marsileaceae genera started to differentiate at mid-Cretaceous<sup>50</sup>. We used the beginning of Cretaceous as the soft maximum age for the stem lineage.

### **23. *Regnellidium***

Hard minimum age constraint: 83.5 Ma. Fossils from the Late Cretaceous were assigned to *Regnellidium* based on preserved sporocarp, megaspore and microspore characters<sup>50</sup>. This calibration point has been used also in a previous study<sup>31</sup>. We applied this constraint to the *Regnellidium diphyllum*–*Pilularia globulifera* node.

Soft maximum age constraint: 145.5 Ma. Based of fossil record it has been estimated that modern Marsileaceae genera started to differentiate at mid-Cretaceous<sup>50</sup> and we assigned the beginning of Cretaceous as the soft maximum age for this node.

### **24. *Azolla***

Hard minimum age constraint: 83.5 Ma. Earliest fossil *Azolla* megaspores appear in the Santonian<sup>53</sup>. We applied this constraint for the *Azolla* stem lineage.

Soft maximum age constraint: 201.6 Ma. The soft maximum age of Marsileaceae (sister family of Salviniaceae, in which *Azolla* belongs) was applied as the maximum age for *Azolla* stem lineage.

### **25. *Azolla* section *Azolla***

Hard minimum age constraint: 13.8 Ma. The minimum age of this section was constrained following a previous study<sup>54</sup>. The age constraint was applied to the section including the stem.

Soft maximum age constraint: 33.9 Ma. All modern *Azolla* share a collared megaspore, a character that is observed in the fossil record first time in the Oligocene<sup>54</sup>. The age constraint was applied to the stem lineage.

## 26. Loxsomataceae

Hard minimum age constraint: 112 Ma. Relationship of the Aptian *Loxsomopteris anasilla* rhizome with Loxsomataceae was suggested by similarity of the hairs covering the rhizome<sup>55</sup>. We assigned the constraint to the Loxsomataceae stem lineage.

Soft maximum age constraint: 251 Ma. Triassic fossils have often been associated with tree ferns<sup>56</sup>, although it is possible that they represent extinct stem lineages of tree ferns or tree ferns and Polypodiales<sup>17</sup>. Molecular clock suggested that the divergence between Polypodiales and tree ferns occurred in Late Triassic<sup>16</sup>. We apply the beginning of Triassic as the soft maximum age for the tree ferns.

## 27. Lophosoria

Hard minimum age constraint: 112 Ma. *Lophosoria cupulata* from the Aptian of Antarctica is placed in the extant genus<sup>57</sup> and was used here to constrain the split between *Lophosoria* and *Dicksonia*.

Soft maximum age constraint: 251 Ma. We apply the beginning of Triassic as the soft maximum age for the tree ferns.

## 28. Cyatheaceae

Hard minimum age constraint: 125 Ma. Permineralized fertilized structures have diagnostic characters of modern *Cyathea*, including abaxially borne sori with globose indusia, annulate sporangia with multiseriate stalks and vertical annuli that are not interrupted by the stalk, and 64 trilete spores<sup>58</sup>. The Barremian *Cyathea cranhamii* represents the oldest unequivocal member of modern Cyatheaceae<sup>58</sup> and is used here as the minimum age constraint, although the permineralized stem genus *Cyathocaulis* appears to be slightly older (Hauterivian)<sup>59</sup> and was resolved as a member of Cyatheaceae in a cladistic analysis<sup>60</sup>. We assigned the constraint to the Cyatheaceae stem lineage.

Soft maximum age constraint: 251 Ma. We apply the beginning of Triassic as the soft maximum age for the tree ferns.

## **29. Lindsaeaceae**

Hard minimum age constraint: 99.6 Ma. Cretaceous fossil roots display sclerenchymatous outer cortex, parenchymatous inner cortex, and an innermost layer of six large cells<sup>61</sup>. This root anatomy is only known in the family Lindsaeaceae<sup>61</sup>. We assigned the constraint to the Lindsaeaceae stem lineage.

Soft maximum age constraint: 201.6 Ma. Some Jurassic fossils have been associated with Lindsaeaceae, although their affinity is highly uncertain<sup>61,62</sup>. Oldest fossils possibly associated with Polypodiales are also Jurassic<sup>17,56,62</sup> and we used the beginning of the Jurassic as the soft maximum age for the stem lineage.

## **30. Pteridaceae**

Hard minimum age constraint: 93.5 Ma. The shape of the pinnae and the presence of pseudoindusia in a Cenomanian fossil<sup>63</sup> closely resemble pteridoid ferns, and this fossil has been used to constrain the origin of pteridoid lineage<sup>16,17,31</sup>. We assigned the constraint to the Pteridaceae stem lineage.

Soft maximum age constraint: 201.6 Ma. Oldest known putative members of Polypodiales are Jurassic<sup>17,56,62</sup> and therefore, we used the beginning of Jurassic as the soft maximum age constrain for the stem lineage.

## **31. *Acrostichum-Ceratopteris* –clade**

Hard minimum age constraint: 65.5 Ma. Macrofossils from Maastrichtian were assigned to *Acrostichum*<sup>64</sup>, but more conservative views consider this fossil as putative stem group member<sup>17,31</sup>.

This more conservative approach is also followed here.

Soft maximum age constraint: 201.6 Ma. The soft maximum age of Pteridaceae was applied to the stem lineage.

### **32. *Ceratopteris***

Hard minimum age constraint: 37.2 Ma. Diagnostic *Ceratopteris* spores are known from the Bartonian<sup>47</sup>. This calibration has also been used in previous studies<sup>17,31</sup>. We assigned the constraint to the *Ceratopteris* stem lineage.

Soft maximum age constraint: 145.5 Ma. If the Late Cretaceous *Acrostichum*<sup>64</sup> indeed represents crown group *Acrostichum* instead of stem group, the divergence between *Acrostichum* and *Ceratopteris* must have occurred earlier during the Cretaceous if not before. We apply the beginning of Cretaceous as the soft maximum age for the stem lineage.

### **33. *Dennstaedtia-Microlepia* –clade**

Hard minimum age constraint: 70.6 Ma. The rhizome and stipe anatomy of the genus *Microlepiopsis* from Campanian are characteristic for the clade containing living species of *Microlepia* and *Dennstaedtia*<sup>65</sup>. This calibration was also applied in a previous study<sup>31</sup>. We assigned the constraint to the stem lineage of this clade.

Soft maximum age constraint: 201.6 Ma. It remains uncertain whether Dennstaedtiaceae or Pteridaceae diverged earlier. For this early divergence within Dennstaedtiaceae we apply the same soft maximum as for the family Pteridaceae.

### **34. *Pteridium***

Hard minimum age constraint: 23 Ma. Fossil evidence indicates worldwide distribution of *Pteridium* by Oligocene<sup>66</sup>. This constraint was assigned to the *Pteridium* stem lineage.

Soft maximum age constraint: 145.5 Ma. We apply the beginning of Cretaceous as the soft maximum age for the stem lineage in lack of good fossil record, but it has been estimated that *Pteridium* likely originated during Cretaceous-Paleogene<sup>67</sup>.

### **35. *Drynaria***

Hard minimum age constraint: 33.9 Ma. Phylogenetic analysis resolved *Protodrynaria takhtajanii* from the Eocene-Oligocene boundary as a member of *Drynaria*<sup>68</sup>. The constraint was assigned to the *Drynaria* stem lineage.

Soft maximum age constraint: 145.5 Ma. Lower Cretaceous deposits of North America and China have yielded fossils with eupolypod characteristics<sup>69–71</sup>. Molecular studies have also suggested Cretaceous origin for the main eupolypod groups<sup>16,17,31</sup>. We apply the beginning of Cretaceous as the soft maximum age for the eupolypod groups.

### **36. *Drynaria mollis***

Hard minimum age constraint: 2.6 Ma. The morphology-based and total-evidence analyses resolved Pliocene *D. callispora* as sister to the extant species *D. mollis*, and these two formed sister lineage to *D. sinica*<sup>68</sup>. Although the morphological results somewhat differed from the molecular results (e.g. *Drynaria* monophyletic vs. paraphyletic), the nodes critical to place *D. callispora* in the phylogeny remained the same and we constrained the *D. mollis*–*D. sinica* split to have occurred before 2.6 Ma.

Soft maximum age constraint: 65.5 Ma. We applied the beginning of Paleogene as the soft maximum age for this phylogenetically recent split.

### **37. Cyclosoroids**

Hard minimum age constraint: 33.9 Ma. Eocene fossils can be assigned as members of cyclosoroids<sup>72</sup>, which form a clade within Thelypteridaceae<sup>73</sup>. This calibration has also been used in previous studies<sup>17,31</sup>. We assigned the constraint to the cyclosoroid stem lineage.

Soft maximum age constraint: 145.5 Ma. We apply the beginning of Cretaceous as the soft maximum age for the eupolypod groups (see above).

### **38. *Onoclea sensibilis***

Hard minimum age constraint: 55.8 Ma. A large number of relatively complete Paleocene fossils conform to the living species in all recognizable features<sup>74</sup>. This calibration has been accepted in previous studies<sup>17,31</sup>, although in these more sparsely sampled analyses the calibration was assigned at deeper phylogenetic level. We assigned the constraint to stem lineage of the clade of two *Onoclea sensibilis* varieties.

Soft maximum age constraint: 145.5 Ma. We apply the beginning of Cretaceous as the soft maximum age for the eupolypod groups (see above).

### **39. *Stenochlaena***

Hard minimum age constraint: 23 Ma. Distinctive spores of *Stenochlaenidites* are essentially identical with the spores of modern *Stenochlaena* and first appear in the late Oligocene<sup>72</sup>. The constraint was assigned to the *Stenochlaena* stem lineage.

Soft maximum age constraint: 145.5 Ma. We apply the beginning of Cretaceous as the soft maximum age for the eupolypod groups (see above).

### **40. *Woodwardia***

Hard minimum age constraint: 55.8 Ma. Several fossil *Woodwardia* species are known from the Paleocene onwards<sup>72</sup>, including *W. bureiensis* from Wuyun Formation of China<sup>75</sup>. This calibration has been used previously as well<sup>31</sup>. The constraint was assigned to the *Woodwardia* stem lineage.

Soft maximum age constraint: 145.5 Ma. We apply the beginning of Cretaceous as the soft maximum age for the eupolypod groups (see above).

### **41. *Woodwardia virginica***

Hard minimum age constraint: 15.4 Ma. Combination of vegetative pinnules, rhizome and stipe anatomy, and fertile pinnules with sori and sporangia from the Middle Miocene were described to be

similar with the extant *Woodwardia virginica*<sup>76</sup>. The fossil bed was dated  $15.6 \pm 0.2$  Ma by Ar/Ar dating technique<sup>76,77</sup>. We used the lower estimate as the hard minimum age to constrain the crown group *Woodwardia*.

Soft maximum age constraint: 145.5 Ma. We apply the soft maximum age of the genus as the soft maximum age for this early diverging species.

#### **42. Athyriaceae**

Hard minimum age constraint: 37.2 Ma. The Middle Eocene *Makopteris princetonensis* is the oldest fossil assigned to the family<sup>78</sup> and has been used to calibrate Athyriaceae in other studies as well<sup>17,31</sup>.

The constraint was assigned to the Athyriaceae stem lineage.

Soft maximum age constraint: 145.5 Ma. We apply the beginning of Cretaceous as the soft maximum age for the eupolypod groups (see above).

#### **Coding of fern life-form**

| Taxa                            | non-epiphytic (0) / epiphytic (1) |
|---------------------------------|-----------------------------------|
| <i>Abrodictyum caudatum</i>     | 1                                 |
| <i>Abrodictyum elongatum</i>    | 0                                 |
| <i>Abrodictyum rigidum</i>      | 0                                 |
| <i>Acrostichum aureum</i>       | 0                                 |
| <i>Acrostichum danaeifolium</i> | 0                                 |
| <i>Actiniopteris dimorpha</i>   | 0                                 |
| <i>Actinostachys pennula</i>    | 0                                 |
| <i>Acystopteris japonica</i>    | 0                                 |
| <i>Acystopteris taiwaniana</i>  | 0                                 |



|                                     |   |
|-------------------------------------|---|
| <i>Adenophorus abietinus</i>        | 1 |
| <i>Adenophorus hymenophylloides</i> | 1 |
| <i>Adenophorus montanus</i>         | 1 |
| <i>Adenophorus oahuensis</i>        | 1 |
| <i>Adenophorus periens</i>          | 1 |
| <i>Adenophorus pinnatifidus</i>     | 1 |
| <i>Adenophorus tamariscinus</i>     | 1 |
| <i>Adenophorus tenellus</i>         | 1 |
| <i>Adenophorus tripinnatifidus</i>  | 1 |
| <i>Adiantopsis radiata</i>          | 0 |
| <i>Adiantum adiantoides</i>         | 0 |
| <i>Adiantum aethiopicum</i>         | 0 |
| <i>Adiantum argutum</i>             | 0 |
| <i>Adiantum capillus-veneris</i>    | 0 |
| <i>Adiantum diaphanum</i>           | 0 |
| <i>Adiantum formosum</i>            | 0 |
| <i>Adiantum hispidulum</i>          | 0 |
| <i>Adiantum malesianum</i>          | 0 |
| <i>Adiantum pedatum</i>             | 0 |
| <i>Adiantum peruvianum</i>          | 0 |
| <i>Adiantum raddianum</i>           | 0 |
| <i>Adiantum tenerum</i>             | 0 |
| <i>Adiantum tetraphyllum</i>        | 0 |

|                                 |   |
|---------------------------------|---|
| <i>Adiantum viridescens</i>     | 0 |
| <i>Alansmia cultrata</i>        | 1 |
| <i>Alansmia glandulifera</i>    | 1 |
| <i>Alansmia lanigera</i>        | 1 |
| <i>Alansmia senilis</i>         | 1 |
| <i>Allosorus argenteus</i>      | 0 |
| <i>Allosorus farinosus</i>      | 0 |
| <i>Allosorus nitidulus</i>      | 0 |
| <i>Alsophila bryophila</i>      | 0 |
| <i>Alsophila cuspidata</i>      | 0 |
| <i>Alsophila dregei</i>         | 0 |
| <i>Alsophila foersteri</i>      | 0 |
| <i>Alsophila hooglandii</i>     | 0 |
| <i>Alsophila stelligera</i>     | 0 |
| <i>Anemia adiantifolia</i>      | 0 |
| <i>Anemia mexicana</i>          | 0 |
| <i>Anemia phyllitidis</i>       | 0 |
| <i>Anemia rotundifolia</i>      | 0 |
| <i>Anemia tomentosa</i>         | 0 |
| <i>Angiopteris evecta</i>       | 0 |
| <i>Angiopteris lygodiifolia</i> | 0 |
| <i>Anogramma guatemalensis</i>  | 0 |
| <i>Anogramma leptophylla</i>    | 0 |

|                                    |   |
|------------------------------------|---|
| <i>Antrophyum latifolium</i>       | 1 |
| <i>Arachniodes amoena</i>          | 0 |
| <i>Arachniodes aristata</i>        | 0 |
| <i>Arachniodes blinii</i>          | 0 |
| <i>Arachniodes caudata</i>         | 0 |
| <i>Arachniodes cavaleri</i>        | 0 |
| <i>Arachniodes centrochinensis</i> | 0 |
| <i>Arachniodes chinensis</i>       | 0 |
| <i>Arachniodes denticulata</i>     | 0 |
| <i>Arachniodes festina</i>         | 0 |
| <i>Arachniodes miqueliana</i>      | 0 |
| <i>Arachniodes quadripinnata</i>   | 0 |
| <i>Arachniodes rhomboides</i>      | 0 |
| <i>Arachniodes simplicior</i>      | 0 |
| <i>Arachniodes speciosa</i>        | 0 |
| <i>Arachniodes standishii</i>      | 0 |
| <i>Arachniodes superba</i>         | 0 |
| <i>Argyrochosma fendleri</i>       | 0 |
| <i>Argyrochosma incana</i>         | 0 |
| <i>Argyrochosma jonesii</i>        | 0 |
| <i>Argyrochosma limitanea</i>      | 0 |
| <i>Arthromeris lehmannii</i>       | 1 |
| <i>Arthromeris wallichiana</i>     | 1 |

|                                    |   |
|------------------------------------|---|
| <i>Arthropteris palisotii</i>      | 0 |
| <i>Arthropteris parallela</i>      | 0 |
| <i>Arthropteris paucivenia</i>     | 1 |
| <i>Ascogrammitis dilatata</i>      | 1 |
| <i>Ascogrammitis anfractuosa</i>   | 1 |
| <i>Ascogrammitis david-smithii</i> | 1 |
| <i>Ascogrammitis nana</i>          | 1 |
| <i>Ascogrammitis pichincae</i>     | 1 |
| <i>Ascogrammitis pichinchensis</i> | 1 |
| <i>Ascogrammitis</i> sp.1          | 1 |
| <i>Ascogrammitis</i> sp.2          | 1 |
| <i>Aspidotis californica</i>       | 0 |
| <i>Aspidotis densa</i>             | 0 |
| <i>Asplenium abscissum</i>         | 0 |
| <i>Asplenium adiantum-nigrum</i>   | 0 |
| <i>Asplenium affine</i>            | 1 |
| <i>Asplenium alatum</i>            | 0 |
| <i>Asplenium angustum</i>          | 1 |
| <i>Asplenium anisophyllum</i>      | 1 |
| <i>Asplenium aureum</i>            | 0 |
| <i>Asplenium auritum</i>           | 1 |
| <i>Asplenium australasicum</i>     | 1 |
| <i>Asplenium bulbiferum</i>        | 1 |

|                                 |   |
|---------------------------------|---|
| <i>Asplenium bullatum</i>       | 0 |
| <i>Asplenium contiguum</i>      | 1 |
| <i>Asplenium cordatum</i>       | 0 |
| <i>Asplenium cristatum</i>      | 1 |
| <i>Asplenium cuneatiforme</i>   | 1 |
| <i>Asplenium cuneifolium</i>    | 0 |
| <i>Asplenium cuspidatum</i>     | 1 |
| <i>Asplenium dielmannii</i>     | 0 |
| <i>Asplenium difforme</i>       | 0 |
| <i>Asplenium elliotii</i>       | 1 |
| <i>Asplenium erectum</i>        | 0 |
| <i>Asplenium feei</i>           | 1 |
| <i>Asplenium fissum</i>         | 0 |
| <i>Asplenium flabellifolium</i> | 1 |
| <i>Asplenium fontanum</i>       | 0 |
| <i>Asplenium forsiense</i>      | 0 |
| <i>Asplenium formosae</i>       | 0 |
| <i>Asplenium formosum</i>       | 0 |
| <i>Asplenium fragile</i>        | 0 |
| <i>Asplenium gemmiferum</i>     | 0 |
| <i>Asplenium hallbergii</i>     | 0 |
| <i>Asplenium harpeodes</i>      | 1 |
| <i>Asplenium hemionitis</i>     | 0 |

|                                 |   |
|---------------------------------|---|
| <i>Asplenium heterochroum</i>   | 0 |
| <i>Asplenium hispanicum</i>     | 0 |
| <i>Asplenium hobdyi</i>         | 0 |
| <i>Asplenium hookerianum</i>    | 0 |
| <i>Asplenium incisum</i>        | 0 |
| <i>Asplenium jahandiezii</i>    | 0 |
| <i>Asplenium juglandifolium</i> | 1 |
| <i>Asplenium laciniatum</i>     | 0 |
| <i>Asplenium lamprophyllum</i>  | 0 |
| <i>Asplenium lucidum</i>        | 0 |
| <i>Asplenium lunulatum</i>      | 0 |
| <i>Asplenium marinum</i>        | 0 |
| <i>Asplenium monanthes</i>      | 1 |
| <i>Asplenium myriophyllum</i>   | 0 |
| <i>Asplenium nidus</i>          | 1 |
| <i>Asplenium normale</i>        | 1 |
| <i>Asplenium obtusatum</i>      | 0 |
| <i>Asplenium planicaule</i>     | 0 |
| <i>Asplenium platyneuron</i>    | 0 |
| <i>Asplenium polyodon</i>       | 1 |
| <i>Asplenium praemorsum</i>     | 1 |
| <i>Asplenium prolongatum</i>    | 0 |
| <i>Asplenium protensum</i>      | 0 |

|                                    |   |
|------------------------------------|---|
| <i>Asplenium pteropus</i>          | 1 |
| <i>Asplenium resiliens</i>         | 0 |
| <i>Asplenium rhizophyllum</i>      | 0 |
| <i>Asplenium rigidum</i>           | 0 |
| <i>Asplenium ritoense</i>          | 0 |
| <i>Asplenium ruta-muraria</i>      | 0 |
| <i>Asplenium sandersonii</i>       | 1 |
| <i>Asplenium scolopendrium</i>     | 0 |
| <i>Asplenium shuttleworthianum</i> | 0 |
| <i>Asplenium simplicifrons</i>     | 1 |
| <i>Asplenium surrogatum</i>        | 1 |
| <i>Asplenium tenerum</i>           | 1 |
| <i>Asplenium theciferum</i>        | 1 |
| <i>Asplenium tricholepis</i>       | 1 |
| <i>Asplenium trichomanes</i>       | 0 |
| <i>Asplenium varians</i>           | 0 |
| <i>Asplenium vieillardii</i>       | 0 |
| <i>Asplenium viride</i>            | 0 |
| <i>Asplenium wrightii</i>          | 0 |
| <i>Asplenium yunnanense</i>        | 0 |
| <i>Athyrium decurrentialatum</i>   | 0 |
| <i>Athyrium filix-femina</i>       | 0 |
| <i>Athyrium nipponicum</i>         | 0 |

|                               |   |
|-------------------------------|---|
| <i>Athyrium otophorum</i>     | 0 |
| <i>Athyrium yokoscense</i>    | 0 |
| <i>Azolla filiculoides</i>    | 0 |
| <i>Azolla nilotica</i>        | 0 |
| <i>Azolla pinnata</i>         | 0 |
| <i>Azolla rubra</i>           | 0 |
| <i>Blechnum brasiliense</i>   | 0 |
| <i>Blechnum cyatheoides</i>   | 0 |
| <i>Blechnum insigne</i>       | 0 |
| <i>Blechnum medium</i>        | 0 |
| <i>Blechnum neglectum</i>     | 0 |
| <i>Blechnum nom.nov.</i>      | 0 |
| <i>Blechnum occidentale</i>   | 0 |
| <i>Blechnum orientale</i>     | 0 |
| <i>Blechnum polypodioides</i> | 0 |
| <i>Blechnum schomburgkii</i>  | 0 |
| <i>Blechnum spicant</i>       | 0 |
| <i>Blotiella pubescens</i>    | 0 |
| <i>Bolbitis appendiculata</i> | 0 |
| <i>Bolbitis auriculata</i>    | 0 |
| <i>Bolbitis heteroclita</i>   | 0 |
| <i>Bommeria ehrenbergiana</i> | 0 |
| <i>Bommeria hispida</i>       | 0 |



|                                     |   |
|-------------------------------------|---|
| <i>Botrychium dissectum</i>         | 0 |
| <i>Botrychium japonicum</i>         | 0 |
| <i>Botrychium lanceolatum</i>       | 0 |
| <i>Botrychium lunaria</i>           | 0 |
| <i>Botrychium lunarioides</i>       | 0 |
| <i>Botrychium simplex</i>           | 0 |
| <i>Botrychium strictum</i>          | 0 |
| <i>Botrychium virginianum</i>       | 0 |
| <i>Calciophlopterus ludens</i>      | 0 |
| <i>Callistopteris apiifolia</i>     | 0 |
| <i>Calochlaena straminea</i>        | 0 |
| <i>Calochlaena villosa</i>          | 0 |
| <i>Calymmodon gracilis</i>          | 1 |
| <i>Calymmodon luerksenianus</i>     | 1 |
| <i>Campyloneurum angustifolium</i>  | 1 |
| <i>Campyloneurum aphanophlebium</i> | 1 |
| <i>Campyloneurum asplundii</i>      | 1 |
| <i>Campyloneurum brevifolium</i>    | 1 |
| <i>Campyloneurum chlorolepis</i>    | 1 |
| <i>Campyloneurum latum</i>          | 1 |
| <i>Campyloneurum xalapense</i>      | 1 |
| <i>Cephalomanes javanicum</i>       | 0 |
| <i>Ceradenia fucoides</i>           | 1 |

|                                    |   |
|------------------------------------|---|
| <i>Ceradenia jungermannioides</i>  | 1 |
| <i>Ceradenia kalbreyeri</i>        | 1 |
| <i>Ceradenia pilipes</i>           | 1 |
| <i>Ceradenia spixiana</i>          | 1 |
| <i>Ceratopteris richardii</i>      | 0 |
| <i>Ceratopteris thalictroides</i>  | 0 |
| <i>Cheilanthes distans</i>         | 0 |
| <i>Cheilanthes lasiophylla</i>     | 0 |
| <i>Cheilanthes sieberi</i>         | 0 |
| <i>Cheiloplecton rigidum</i>       | 0 |
| <i>Cheiropleuria integrifolia</i>  | 0 |
| <i>Christensenia aesculifolia</i>  | 0 |
| <i>Chrysogrammitis musgraviana</i> | 1 |
| <i>Cibotium barometz</i>           | 0 |
| <i>Cibotium glaucum</i>            | 0 |
| <i>Cibotium schiedei</i>           | 0 |
| <i>Cochlidium punctatum</i>        | 1 |
| <i>Cochlidium rostratum</i>        | 1 |
| <i>Cochlidium seminudum</i>        | 1 |
| <i>Cochlidium serrulatum</i>       | 1 |
| <i>Coniogramme fraxinea</i>        | 0 |
| <i>Coniogramme japonica</i>        | 0 |
| <i>Crepidomanes bipunctatum</i>    | 1 |

|                                   |   |
|-----------------------------------|---|
| <i>Crepidomanes minutum</i>       | 1 |
| <i>Crepidomanes thysanostomum</i> | 0 |
| <i>Cryptogramma crista</i>        | 0 |
| <i>Ctenitis decurrentipinnata</i> | 0 |
| <i>Ctenitis eatonii</i>           | 0 |
| <i>Ctenitis refulgens</i>         | 0 |
| <i>Ctenitis rhodolepis</i>        | 0 |
| <i>Ctenitis sloanei</i>           | 0 |
| <i>Ctenitis submarginalis</i>     | 0 |
| <i>Ctenopteris lasiostipes</i>    | 1 |
| <i>Ctenopteris nutans</i>         | 1 |
| <i>Ctenopteris repandula</i>      | 1 |
| <i>Culcita conifolia</i>          | 0 |
| <i>Culcita macrocarpa</i>         | 0 |
| <i>Cyathea alata</i>              | 0 |
| <i>Cyathea arborea</i>            | 0 |
| <i>Cyathea dejecta</i>            | 0 |
| <i>Cyathea horrida</i>            | 0 |
| <i>Cyathea howeana</i>            | 0 |
| <i>Cyathea multiflora</i>         | 0 |
| <i>Cyathea parvula</i>            | 0 |
| <i>Cyathea poeppigii</i>          | 0 |
| <i>Cyathea senilis</i>            | 0 |

|                                  |   |
|----------------------------------|---|
| <i>Cyclopeltis crenata</i>       | 0 |
| <i>Cyclopeltis semicordata</i>   | 0 |
| <i>Cyrtomium falcatum</i>        | 0 |
| <i>Cyrtomium fortunei</i>        | 0 |
| <i>Cyrtomium macrophyllum</i>    | 0 |
| <i>Cyrtomium nephrolepioides</i> | 0 |
| <i>Cyrtomium urophyllum</i>      | 0 |
| <i>Cystodium sorbifolium</i>     | 0 |
| <i>Cystopteris fragilis</i>      | 0 |
| <i>Danaea alata</i>              | 0 |
| <i>Danaea falcata</i>            | 0 |
| <i>Danaea nodosa</i>             | 0 |
| <i>Danaea simplicifolia</i>      | 0 |
| <i>Danaea</i> sp.                | 0 |
| <i>Danaea urbanii</i>            | 0 |
| <i>Danaea wendlandii</i>         | 0 |
| <i>Davallia burbidgei</i>        | 1 |
| <i>Davallia clarkei</i>          | 1 |
| <i>Davallia corniculata</i>      | 1 |
| <i>Davallia divaricata</i>       | 1 |
| <i>Davallia epiphylla</i>        | 1 |
| <i>Davallia fejeensis</i>        | 1 |
| <i>Davallia griffithiana</i>     | 1 |

|                                  |   |
|----------------------------------|---|
| <i>Davallia hirsuta</i>          | 1 |
| <i>Davallia hymenophylloides</i> | 1 |
| <i>Davallia mariesii</i>         | 1 |
| <i>Davallia melanophlebia</i>    | 1 |
| <i>Davallia parvula</i>          | 1 |
| <i>Davallia perdurans</i>        | 1 |
| <i>Davallia plumosa</i>          | 1 |
| <i>Davallia polypodioides</i>    | 1 |
| <i>Davallia pulchra</i>          | 1 |
| <i>Davallia pyxidata</i>         | 1 |
| <i>Davallia repens</i>           | 1 |
| <i>Davallia solida</i>           | 1 |
| <i>Davallia tasmanii</i>         | 0 |
| <i>Davallia trichomanoides</i>   | 1 |
| <i>Davallia triphylla</i>        | 1 |
| <i>Davallia yunnanensis</i>      | 1 |
| <i>Dennstaedtia punctilobula</i> | 0 |
| <i>Dennstaedtia scabra</i>       | 0 |
| <i>Deparia bonincola</i>         | 0 |
| <i>Deparia lancea</i>            | 0 |
| <i>Deparia petersenii</i>        | 0 |
| <i>Deparia unifurcata</i>        | 0 |
| <i>Dicksonia antarctica</i>      | 0 |

|                                    |   |
|------------------------------------|---|
| <i>Dicksonia thyrsopteroides</i>   | 0 |
| <i>Dicranopteris linearis</i>      | 0 |
| <i>Dictymia brownii</i>            | 1 |
| <i>Dictymia mckeei</i>             | 1 |
| <i>Didymochlaena truncatula</i>    | 0 |
| <i>Didymoglossum cuspidatum</i>    | 1 |
| <i>Didymoglossum ekmanii</i>       | 1 |
| <i>Didymoglossum hildebrandtii</i> | 1 |
| <i>Didymoglossum krausii</i>       | 1 |
| <i>Didymoglossum membranaceum</i>  | 1 |
| <i>Diplaziopsis javanica</i>       | 0 |
| <i>Diplazium bombonasa</i>         | 0 |
| <i>Diplazium centripetale</i>      | 0 |
| <i>Diplazium cristatum</i>         | 0 |
| <i>Diplazium dilatatum</i>         | 0 |
| <i>Diplazium hachijoense</i>       | 0 |
| <i>Diplazium legalloi</i>          | 0 |
| <i>Diplazium okudairai</i>         | 0 |
| <i>Diplazium plantaginifolium</i>  | 0 |
| <i>Diplazium proliferum</i>        | 0 |
| <i>Diplazium virescens</i>         | 0 |
| <i>Diplazium wichurae</i>          | 0 |
| <i>Diplopterygium bancroftii</i>   | 0 |

|                                   |   |
|-----------------------------------|---|
| <i>Diplopterygium glaucum</i>     | 0 |
| <i>Diplopterygium laevissimum</i> | 0 |
| <i>Dipteris conjugata</i>         | 0 |
| <i>Doryopteris gleichenioides</i> | 0 |
| <i>Doryopteris nobilis</i>        | 0 |
| <i>Doryopteris rediviva</i>       | 0 |
| <i>Doryopteris sagittifolia</i>   | 0 |
| <i>Doryopteris viridis</i>        | 0 |
| <i>Dracoglossum plantagineum</i>  | 0 |
| <i>Drynaria acuminata</i>         | 1 |
| <i>Drynaria bonii</i>             | 1 |
| <i>Drynaria coronans</i>          | 1 |
| <i>Drynaria drynarioides</i>      | 1 |
| <i>Drynaria laurentii</i>         | 1 |
| <i>Drynaria meyeniana</i>         | 1 |
| <i>Drynaria mollis</i>            | 1 |
| <i>Drynaria nom.nov.</i>          | 1 |
| <i>Drynaria novoguineensis</i>    | 1 |
| <i>Drynaria pilosa</i>            | 1 |
| <i>Drynaria rigidula</i>          | 1 |
| <i>Drynaria sagitta</i>           | 1 |
| <i>Drynaria sinica</i>            | 1 |
| <i>Drynaria sp.</i>               | 1 |

|                                 |   |
|---------------------------------|---|
| <i>Drynaria sparsisora</i>      | 1 |
| <i>Drynaria splendens</i>       | 1 |
| <i>Drynaria volkensis</i>       | 1 |
| <i>Dryopteris aemula</i>        | 0 |
| <i>Dryopteris annamensis</i>    | 0 |
| <i>Dryopteris bissetiana</i>    | 0 |
| <i>Dryopteris crassirhizoma</i> | 0 |
| <i>Dryopteris diffracta</i>     | 0 |
| <i>Dryopteris erythrosora</i>   | 0 |
| <i>Dryopteris expansa</i>       | 0 |
| <i>Dryopteris filix-mas</i>     | 0 |
| <i>Dryopteris goldiana</i>      | 0 |
| <i>Dryopteris hasseltii</i>     | 0 |
| <i>Dryopteris hendersonii</i>   | 0 |
| <i>Dryopteris heterolaena</i>   | 0 |
| <i>Dryopteris hookeriana</i>    | 0 |
| <i>Dryopteris labordei</i>      | 0 |
| <i>Dryopteris marginalis</i>    | 0 |
| <i>Dryopteris mariformis</i>    | 0 |
| <i>Dryopteris maximowiczii</i>  | 0 |
| <i>Dryopteris neolacera</i>     | 0 |
| <i>Dryopteris nodosa</i>        | 0 |
| <i>Dryopteris pacifica</i>      | 0 |



|                                     |   |
|-------------------------------------|---|
| <i>Dryopteris sacrosancta</i>       | 0 |
| <i>Dryopteris sieboldii</i>         | 0 |
| <i>Dryopteris sparsa</i>            | 0 |
| <i>Dryopteris squamiseta</i>        | 0 |
| <i>Dryopteris uniformis</i>         | 0 |
| <i>Dryopteris wallichiana</i>       | 0 |
| <i>Elaphoglossum amygdalifolium</i> | 0 |
| <i>Elaphoglossum andicola</i>       | 1 |
| <i>Elaphoglossum aubertii</i>       | 0 |
| <i>Elaphoglossum burchellii</i>     | 0 |
| <i>Elaphoglossum callifolium</i>    | 0 |
| <i>Elaphoglossum crassifolium</i>   | 1 |
| <i>Elaphoglossum crinitum</i>       | 1 |
| <i>Elaphoglossum deltoides</i>      | 0 |
| <i>Elaphoglossum erinaceum</i>      | 1 |
| <i>Elaphoglossum flaccidum</i>      | 1 |
| <i>Elaphoglossum glabellum</i>      | 1 |
| <i>Elaphoglossum heterolepis</i>    | 1 |
| <i>Elaphoglossum hybridum</i>       | 0 |
| <i>Elaphoglossum lechlerianum</i>   | 1 |
| <i>Elaphoglossum lingua</i>         | 1 |
| <i>Elaphoglossum lonchophyllum</i>  | 1 |
| <i>Elaphoglossum minutum</i>        | 0 |

|                                    |   |
|------------------------------------|---|
| <i>Elaphoglossum paleaceum</i>     | 1 |
| <i>Elaphoglossum papillosum</i>    | 1 |
| <i>Elaphoglossum peltatum</i>      | 1 |
| <i>Elaphoglossum piloselloides</i> | 1 |
| <i>Elaphoglossum samoense</i>      | 1 |
| <i>Elaphoglossum tripartitum</i>   | 0 |
| <i>Enterosora parietina</i>        | 1 |
| <i>Enterosora percrassa</i>        | 1 |
| <i>Enterosora trifurcata</i>       | 1 |
| <i>Equisetum arvense</i>           | 0 |
| <i>Equisetum bogotense</i>         | 0 |
| <i>Equisetum diffusum</i>          | 0 |
| <i>Equisetum ferrissii</i>         | 0 |
| <i>Equisetum giganteum</i>         | 0 |
| <i>Equisetum myriochaetum</i>      | 0 |
| <i>Equisetum pratense</i>          | 0 |
| <i>Equisetum ramosissimum</i>      | 0 |
| <i>Equisetum scirpoides</i>        | 0 |
| <i>Equisetum sylvaticum</i>        | 0 |
| <i>Equisetum telmateia</i>         | 0 |
| <i>Equisetum variegatum</i>        | 0 |
| <i>Eupodium laeve</i>              | 0 |
| <i>Gaga arizonica</i>              | 0 |

|                                     |   |
|-------------------------------------|---|
| <i>Galactodenia subscabra</i>       | 1 |
| <i>Gleichenella pectinata</i>       | 0 |
| <i>Gleichenia dicarpa</i>           | 0 |
| <i>Goniophlebium amoenum</i>        | 1 |
| <i>Goniophlebium argutum</i>        | 1 |
| <i>Goniophlebium chinense</i>       | 1 |
| <i>Goniophlebium formosanum</i>     | 1 |
| <i>Goniophlebium manmeiense</i>     | 1 |
| <i>Goniophlebium mehibitense</i>    | 1 |
| <i>Goniophlebium microrhizoma</i>   | 1 |
| <i>Goniophlebium percussum</i>      | 1 |
| <i>Goniophlebium persicifolium</i>  | 1 |
| <i>Goniophlebium pseudoconnatum</i> | 1 |
| <i>Goniophlebium subauriculatum</i> | 1 |
| <i>Grammitis bryophila</i>          | 1 |
| <i>Grammitis deplanchei</i>         | 0 |
| <i>Grammitis kyimbilensis</i>       | 1 |
| <i>Grammitis melanoloma</i>         | 1 |
| <i>Gymnocarpium dryopteris</i>      | 0 |
| <i>Gymnocarpium oyamense</i>        | 0 |
| <i>Gymnocarpium remotepinnatum</i>  | 0 |
| <i>Gymnosphaera capensis</i>        | 0 |
| <i>Gymnosphaera klossii</i>         | 0 |

|                                   |   |
|-----------------------------------|---|
| <i>Gymnosphaera podophylla</i>    | 0 |
| <i>Gymnosphaera ramispina</i>     | 0 |
| <i>Gymnosphaera salvinii</i>      | 0 |
| <i>Haplopteris elongata</i>       | 1 |
| <i>Haplopteris graminea</i>       | 1 |
| <i>Haplopteris taeniophylla</i>   | 1 |
| <i>Haplopteris volkensis</i>      | 1 |
| <i>Hecistopteris pumila</i>       | 1 |
| <i>Helminthostachys zeylanica</i> | 0 |
| <i>Hemidictyum marginatum</i>     | 0 |
| <i>Hemionitis arifolia</i>        | 0 |
| <i>Hemionitis palmata</i>         | 0 |
| <i>Histiopteris incisa</i>        | 0 |
| <i>Homalosorus pycnocarpus</i>    | 0 |
| <i>Hymenasplenium cheilosorum</i> | 0 |
| <i>Hymenasplenium excisum</i>     | 1 |
| <i>Hymenasplenium laetum</i>      | 0 |
| <i>Hymenasplenium unilaterale</i> | 1 |
| <i>Hymenophyllum acanthoides</i>  | 1 |
| <i>Hymenophyllum apiculatum</i>   | 1 |
| <i>Hymenophyllum armstrongii</i>  | 1 |
| <i>Hymenophyllum atrovirens</i>   | 0 |
| <i>Hymenophyllum badium</i>       | 1 |

|                                     |   |
|-------------------------------------|---|
| <i>Hymenophyllum baileyianum</i>    | 1 |
| <i>Hymenophyllum barbatum</i>       | 1 |
| <i>Hymenophyllum bivalve</i>        | 1 |
| <i>Hymenophyllum caespitosum</i>    | 1 |
| <i>Hymenophyllum caudiculatum</i>   | 1 |
| <i>Hymenophyllum cruentum</i>       | 1 |
| <i>Hymenophyllum cupressiforme</i>  | 1 |
| <i>Hymenophyllum demissum</i>       | 1 |
| <i>Hymenophyllum dentatum</i>       | 1 |
| <i>Hymenophyllum deplanchei</i>     | 1 |
| <i>Hymenophyllum dicranotrichum</i> | 1 |
| <i>Hymenophyllum digitatum</i>      | 1 |
| <i>Hymenophyllum dilatatum</i>      | 1 |
| <i>Hymenophyllum exsertum</i>       | 1 |
| <i>Hymenophyllum flexuosum</i>      | 1 |
| <i>Hymenophyllum frankliniae</i>    | 1 |
| <i>Hymenophyllum fuciforme</i>      | 1 |
| <i>Hymenophyllum fucoides</i>       | 1 |
| <i>Hymenophyllum heimii</i>         | 1 |
| <i>Hymenophyllum hirsutum</i>       | 1 |
| <i>Hymenophyllum hygrometricum</i>  | 1 |
| <i>Hymenophyllum imbricatum</i>     | 1 |
| <i>Hymenophyllum inaequale</i>      | 1 |

|                                        |   |
|----------------------------------------|---|
| <i>Hymenophyllum javanicum</i>         | 1 |
| <i>Hymenophyllum kuhnii</i>            | 1 |
| <i>Hymenophyllum lanceolatum</i>       | 1 |
| <i>Hymenophyllum leratii</i>           | 0 |
| <i>Hymenophyllum lyallii</i>           | 1 |
| <i>Hymenophyllum malingii</i>          | 1 |
| <i>Hymenophyllum marginatum</i>        | 1 |
| <i>Hymenophyllum minimum</i>           | 1 |
| <i>Hymenophyllum mnioides</i>          | 1 |
| <i>Hymenophyllum multifidum</i>        | 0 |
| <i>Hymenophyllum pallidum</i>          | 0 |
| <i>Hymenophyllum paniense</i>          | 1 |
| <i>Hymenophyllum pectinatum</i>        | 1 |
| <i>Hymenophyllum peltatum</i>          | 1 |
| <i>Hymenophyllum perrieri</i>          | 1 |
| <i>Hymenophyllum plicatum</i>          | 1 |
| <i>Hymenophyllum polyanthos</i>        | 1 |
| <i>Hymenophyllum poolii</i>            | 1 |
| <i>Hymenophyllum pulcherrimum</i>      | 1 |
| <i>Hymenophyllum rolandi-principis</i> | 1 |
| <i>Hymenophyllum rufescens</i>         | 1 |
| <i>Hymenophyllum rugosum</i>           | 1 |
| <i>Hymenophyllum scabrum</i>           | 1 |

|                                     |   |
|-------------------------------------|---|
| <i>Hymenophyllum secundum</i>       | 1 |
| <i>Hymenophyllum serrulatum</i>     | 1 |
| <i>Hymenophyllum sibthorpioides</i> | 1 |
| <i>Hymenophyllum</i> sp.            | 1 |
| <i>Hymenophyllum subdimidiatum</i>  | 1 |
| <i>Hymenophyllum tenellum</i>       | 1 |
| <i>Hymenophyllum tunbrigense</i>    | 1 |
| <i>Hymenophyllum undulatum</i>      | 0 |
| <i>Hymenophyllum villosum</i>       | 1 |
| <i>Hymenophyllum wrightii</i>       | 1 |
| <i>Hypodematum crenatum</i>         | 0 |
| <i>Hypolepis tenuifolia</i>         | 0 |
| <i>Jamesonia canescens</i>          | 0 |
| <i>Jamesonia cheilanthoides</i>     | 0 |
| <i>Jamesonia flexuosa</i>           | 0 |
| <i>Jamesonia verticalis</i>         | 0 |
| <i>Lastreopsis hispida</i>          | 0 |
| <i>Lastreopsis subrecedens</i>      | 0 |
| <i>Lellingeria apiculata</i>        | 1 |
| <i>Lellingeria brevistipes</i>      | 1 |
| <i>Lellingeria depressa</i>         | 1 |
| <i>Lellingeria dissimulans</i>      | 1 |
| <i>Lellingeria flagellipinnata</i>  | 1 |

|                                           |   |
|-------------------------------------------|---|
| <i>Lellingeria hirsuta</i>                | 1 |
| <i>Lellingeria isidrensis</i>             | 1 |
| <i>Lellingeria itatimensis</i>            | 0 |
| <i>Lellingeria kaieteura</i>              | 1 |
| <i>Lellingeria melanotrichia</i>          | 1 |
| <i>Lellingeria phlegmaria</i>             | 1 |
| <i>Lellingeria pseudocapillaris</i>       | 1 |
| <i>Lellingeria randallii</i>              | 1 |
| <i>Lellingeria simacensis</i>             | 1 |
| <i>Lellingeria</i> sp.1                   | 1 |
| <i>Lellingeria</i> sp.2                   | 1 |
| <i>Lellingeria subsessilis</i>            | 1 |
| <i>Lellingeria suspensa</i>               | 1 |
| <i>Lellingeria tenuicula</i>              | 1 |
| <i>Lemmaphyllum carnosum</i>              | 1 |
| <i>Lemmaphyllum microphyllum</i>          | 1 |
| <i>Lemmaphyllum rostratum</i>             | 1 |
| <i>Lemmaphyllum squamatum</i>             | 0 |
| <i>Lepidomicrosorium buergerianum</i>     | 0 |
| <i>Lepidomicrosorium subhemionitideum</i> | 1 |
| <i>Lepidomicrosorium superficiale</i>     | 1 |
| <i>Lepisorus accedens</i>                 | 1 |
| <i>Lepisorus annamensis</i>               | 1 |



|                                    |   |
|------------------------------------|---|
| <i>Lepisorus annuifrons</i>        | 1 |
| <i>Lepisorus boninensis</i>        | 1 |
| <i>Lepisorus excavatus</i>         | 1 |
| <i>Lepisorus henryi</i>            | 1 |
| <i>Lepisorus kawakamii</i>         | 1 |
| <i>Lepisorus lewisii</i>           | 0 |
| <i>Lepisorus marginatus</i>        | 1 |
| <i>Lepisorus miyoshianus</i>       | 1 |
| <i>Lepisorus monilisorus</i>       | 1 |
| <i>Lepisorus mucronatus</i>        | 1 |
| <i>Lepisorus nudus</i>             | 1 |
| <i>Lepisorus platyrhynchos</i>     | 1 |
| <i>Lepisorus pseudonudus</i>       | 1 |
| <i>Lepisorus pseudoussuriensis</i> | 1 |
| <i>Lepisorus scolopendrius</i>     | 1 |
| <i>Lepisorus sinensis</i>          | 1 |
| <i>Lepisorus spicatus</i>          | 1 |
| <i>Lepisorus thaipaiensis</i>      | 1 |
| <i>Lepisorus thunbergianus</i>     | 1 |
| <i>Lepisorus uchiyamae</i>         | 0 |
| <i>Leptochilus cantoniensis</i>    | 0 |
| <i>Leptochilus decurrens</i>       | 1 |
| <i>Leptochilus digitatus</i>       | 0 |

|                                        |   |
|----------------------------------------|---|
| <i>Leptochilus ellipticus</i>          | 0 |
| <i>Leptochilus hemionitideus</i>       | 0 |
| <i>Leptochilus henryi</i>              | 0 |
| <i>Leptochilus simplicifrons</i>       | 0 |
| <i>Leptochilus triphyllus</i>          | 0 |
| <i>Leptochilus wrightii</i>            | 1 |
| <i>Leptochilus xhemitomus</i>          | 0 |
| <i>Leptolepia nom.nov.</i>             | 0 |
| <i>Leptolepia novae-zelandiae</i>      | 0 |
| <i>Leptopteris superba</i>             | 0 |
| <i>Leptopteris wilkesiana</i>          | 0 |
| <i>Leucostegia immersa</i>             | 1 |
| <i>Leucostegia pallida</i>             | 1 |
| <i>Leucotrichium mitchelliae</i>       | 1 |
| <i>Leucotrichium mortonii</i>          | 1 |
| <i>Leucotrichium organense</i>         | 1 |
| <i>Leucotrichium pseudomitchelliae</i> | 1 |
| <i>Leucotrichium schenckii</i>         | 1 |
| <i>Lindsaea blotiana</i>               | 0 |
| <i>Lindsaea botrychioides</i>          | 0 |
| <i>Lindsaea ensifolia</i>              | 0 |
| <i>Lindsaea imrayana</i>               | 0 |
| <i>Lindsaea multisora</i>              | 0 |

|                                 |   |
|---------------------------------|---|
| <i>Lindsaea parasitica</i>      | 1 |
| <i>Lindsaea plicata</i>         | 0 |
| <i>Lindsaea quadrangularis</i>  | 0 |
| <i>Lindsaea rufa</i>            | 0 |
| <i>Lindsaea stricta</i>         | 0 |
| <i>Llavea cordifolia</i>        | 0 |
| <i>Lomagramma matthewii</i>     | 0 |
| <i>Lomariopsis japurensis</i>   | 0 |
| <i>Lomariopsis pollicina</i>    | 0 |
| <i>Lomariopsis sorbifolia</i>   | 0 |
| <i>Lomariopsis</i> sp.          | 0 |
| <i>Lomariopsis spectabilis</i>  | 0 |
| <i>Lonchitis hirsuta</i>        | 0 |
| <i>Lophosoria quadripinnata</i> | 0 |
| <i>Loxogramme abyssinica</i>    | 1 |
| <i>Loxogramme avenia</i>        | 1 |
| <i>Loxogramme dictyopteris</i>  | 1 |
| <i>Loxogramme grammitoides</i>  | 1 |
| <i>Loxogramme salicifolia</i>   | 1 |
| <i>Loxsoma cunninghamii</i>     | 0 |
| <i>Loxsomopsis pearcei</i>      | 0 |
| <i>Lygodium japonicum</i>       | 0 |
| <i>Lygodium lanceolatum</i>     | 0 |

|                                    |   |
|------------------------------------|---|
| <i>Lygodium radiatum</i>           | 0 |
| <i>Lygodium reticulatum</i>        | 0 |
| <i>Macrothelypteris torresiana</i> | 0 |
| <i>Marattia alata</i>              | 0 |
| <i>Marsilea crenata</i>            | 0 |
| <i>Marsilea crotophora</i>         | 0 |
| <i>Marsilea drummondii</i>         | 0 |
| <i>Marsilea gibba</i>              | 0 |
| <i>Marsilea mutica</i>             | 0 |
| <i>Marsilea nubica</i>             | 0 |
| <i>Marsilea vera</i>               | 0 |
| <i>Matonia pectinata</i>           | 0 |
| <i>Matteuccia struthiopteris</i>   | 0 |
| <i>Maxonia apiifolia</i>           | 0 |
| <i>Megalastrum subincisum</i>      | 0 |
| <i>Melpomene allosuroides</i>      | 1 |
| <i>Melpomene gracilis</i>          | 1 |
| <i>Melpomene melanosticta</i>      | 1 |
| <i>Melpomene moniliformis</i>      | 0 |
| <i>Metaxya rostrata</i>            | 0 |
| <i>Mickelia guianensis</i>         | 0 |
| <i>Mickelia nicotianifolia</i>     | 0 |
| <i>Microgramma baldwinii</i>       | 1 |

|                                  |   |
|----------------------------------|---|
| <i>Microgramma bifrons</i>       | 1 |
| <i>Microgramma fuscopunctata</i> | 1 |
| <i>Microgramma lycopodioides</i> | 1 |
| <i>Microgramma mauritiana</i>    | 1 |
| <i>Microgramma megalophylla</i>  | 1 |
| <i>Microgramma nitida</i>        | 1 |
| <i>Microgramma percussa</i>      | 1 |
| <i>Microgramma</i> sp.           | 1 |
| <i>Microgramma squamulosa</i>    | 1 |
| <i>Microgramma tecta</i>         | 1 |
| <i>Microgramma vacciniifolia</i> | 1 |
| <i>Microlepia platyphylla</i>    | 0 |
| <i>Microlepia speluncae</i>      | 0 |
| <i>Microlepia szechuanica</i>    | 0 |
| <i>Microsorium carnosum</i>      | 1 |
| <i>Microsorium commutatum</i>    | 0 |
| <i>Microsorium crustaceum</i>    | 1 |
| <i>Microsorium cuspidatum</i>    | 1 |
| <i>Microsorium grossum</i>       | 0 |
| <i>Microsorium hainanense</i>    | 1 |
| <i>Microsorium insigne</i>       | 0 |
| <i>Microsorium lastii</i>        | 1 |
| <i>Microsorium linguiforme</i>   | 1 |

|                                     |   |
|-------------------------------------|---|
| <i>Microsorium luzonense</i>        | 1 |
| <i>Microsorium membranaceum</i>     | 1 |
| <i>Microsorium mirabile</i>         | 1 |
| <i>Microsorium musifolium</i>       | 1 |
| <i>Microsorium novae-zealandiae</i> | 1 |
| <i>Microsorium papuanum</i>         | 0 |
| <i>Microsorium pteropus</i>         | 0 |
| <i>Microsorium punctatum</i>        | 1 |
| <i>Microsorium pustulatum</i>       | 1 |
| <i>Microsorium sarcopus</i>         | 1 |
| <i>Microsorium scandens</i>         | 1 |
| <i>Microsorium sinuosum</i>         | 1 |
| <i>Microsorium spectrum</i>         | 1 |
| <i>Microsorium thailandicum</i>     | 0 |
| <i>Microsorium varians</i>          | 1 |
| <i>Microsorium vieillardii</i>      | 1 |
| <i>Microsorium whiteheadii</i>      | 0 |
| <i>Mildella intramarginalis</i>     | 0 |
| <i>Monachosorum henryi</i>          | 0 |
| <i>Moranopteris achilleifolia</i>   | 1 |
| <i>Moranopteris hyalina</i>         | 1 |
| <i>Moranopteris longisetosa</i>     | 1 |
| <i>Moranopteris taenifolia</i>      | 1 |

|                                      |   |
|--------------------------------------|---|
| <i>Moranopteris zurquina</i>         | 1 |
| <i>Mycopteris alsopteris</i>         | 1 |
| <i>Mycopteris semihirsuta</i>        | 1 |
| <i>Mycopteris</i> sp.1               | 1 |
| <i>Mycopteris</i> sp.2               | 1 |
| <i>Mycopteris subtilis</i>           | 1 |
| <i>Mycopteris taxifolia</i>          | 1 |
| <i>Myriopteris alabamensis</i>       | 0 |
| <i>Myriopteris aurea</i>             | 0 |
| <i>Myriopteris covillei</i>          | 0 |
| <i>Myriopteris lanosa</i>            | 0 |
| <i>Myriopteris lendigera</i>         | 0 |
| <i>Myriopteris myriophylla</i>       | 0 |
| <i>Myriopteris newberryi</i>         | 0 |
| <i>Myriopteris pringlei</i>          | 0 |
| <i>Myriopteris rufa</i>              | 0 |
| <i>Myriopteris wrightii</i>          | 0 |
| <i>Neocheiropteris palmatopedata</i> | 1 |
| <i>Neolepisorus ensatus</i>          | 1 |
| <i>Neolepisorus fortunei</i>         | 1 |
| <i>Neolepisorus phyllomanes</i>      | 0 |
| <i>Neolepisorus zippelii</i>         | 1 |
| <i>Nephrolepis abrupta</i>           | 0 |

|                                  |   |
|----------------------------------|---|
| <i>Nephrolepis cordifolia</i>    | 0 |
| <i>Nephrolepis davalliae</i>     | 1 |
| <i>Nephrolepis davallioides</i>  | 1 |
| <i>Nephrolepis exaltata</i>      | 1 |
| <i>Nephrolepis falcata</i>       | 1 |
| <i>Nephrolepis hirsutula</i>     | 0 |
| <i>Nephrolepis lauterbachii</i>  | 1 |
| <i>Nephrolepis rivularis</i>     | 1 |
| <i>Nephrolepis undulata</i>      | 0 |
| <i>Nesolindsaea kirkii</i>       | 0 |
| <i>Niphidium crassifolium</i>    | 1 |
| <i>Notholaena aschenborniana</i> | 0 |
| <i>Notholaena aurantiaca</i>     | 0 |
| <i>Notholaena aurea</i>          | 0 |
| <i>Notholaena brachypus</i>      | 0 |
| <i>Notholaena bryopoda</i>       | 0 |
| <i>Notholaena californica</i>    | 0 |
| <i>Notholaena candida</i>        | 0 |
| <i>Notholaena grayi</i>          | 0 |
| <i>Notholaena greggii</i>        | 0 |
| <i>Notholaena lemmonii</i>       | 0 |
| <i>Notholaena leucopoda</i>      | 0 |
| <i>Notholaena neglecta</i>       | 0 |



|                                                  |   |
|--------------------------------------------------|---|
| <i>Notholaena rigida</i>                         | 0 |
| <i>Notholaena rosei</i>                          | 0 |
| <i>Notholaena schaffneri</i>                     | 0 |
| <i>Notholaena standleyi</i>                      | 0 |
| <i>Notholaena sulphurea</i>                      | 0 |
| <i>Notholaena trichomanoides</i>                 | 0 |
| <i>Notogrammitis billardierei</i>                | 1 |
| <i>Notogrammitis ciliata</i>                     | 0 |
| <i>Notogrammitis crassior</i>                    | 0 |
| <i>Notogrammitis heterophylla</i>                | 1 |
| <i>Notogrammitis pseudociliata</i>               | 1 |
| <i>Odontosoria aculeata</i>                      | 0 |
| <i>Odontosoria biflora</i>                       | 0 |
| <i>Odontosoria chinensis</i>                     | 0 |
| <i>Oleandra articulata</i>                       | 1 |
| <i>Oleandra pistillaris</i>                      | 1 |
| <i>Onoclea sensibilis</i>                        | 0 |
| <i>Onoclea sensibilis</i> var. <i>interrupta</i> | 0 |
| <i>Onocleopsis hintonii</i>                      | 0 |
| <i>Onychium japonicum</i>                        | 0 |
| <i>Ophioglossum pendulum</i>                     | 1 |
| <i>Ophioglossum reticulatum</i>                  | 0 |
| <i>Oreogrammitis congener</i>                    | 1 |

|                                                      |   |
|------------------------------------------------------|---|
| <i>Oreogrammitis dolichosora</i>                     | 0 |
| <i>Oreogrammitis forbesiana</i>                      | 1 |
| <i>Oreogrammitis hookeri</i>                         | 1 |
| <i>Oreogrammitis knutsfordiana</i>                   | 1 |
| <i>Oreogrammitis padangensis</i>                     | 1 |
| <i>Oreogrammitis reinwardtioides</i>                 | 1 |
| <i>Osmolindsaea japonica</i>                         | 0 |
| <i>Osmolindsaea odorata</i>                          | 0 |
| <i>Osmunda banksiifolia</i>                          | 0 |
| <i>Osmunda claytoniana</i>                           | 0 |
| <i>Osmunda javanica</i>                              | 0 |
| <i>Osmunda regalis</i>                               | 0 |
| <i>Osmundastrum cinnamomeum</i>                      | 0 |
| <i>Osmundastrum cinnamomeum</i> var. <i>fokiense</i> | 0 |
| <i>Paesia scaberula</i>                              | 0 |
| <i>Paragramma longifolia</i>                         | 1 |
| <i>Parapolystichum glabellum</i>                     | 0 |
| <i>Parapolystichum glabellum</i> <i>effusum</i>      | 0 |
| <i>Pecluma alfredii</i>                              | 1 |
| <i>Pecluma chnoophora</i>                            | 1 |
| <i>Pecluma dulcis</i>                                | 1 |
| <i>Pecluma eurybasis</i>                             | 1 |
| <i>Pecluma hartwegiana</i>                           | 1 |

|                                     |   |
|-------------------------------------|---|
| <i>Pecluma longepinnulata</i>       | 1 |
| <i>Pecluma longepinnulata</i>       | 1 |
| <i>Pecluma ptilodon</i>             | 1 |
| <i>Pecluma rhachipterygia</i>       | 0 |
| <i>Pellaea andromedifolia</i>       | 0 |
| <i>Pellaea atropurpurea</i>         | 0 |
| <i>Pellaea bipinnata</i>            | 0 |
| <i>Pellaea breweri</i>              | 0 |
| <i>Pellaea cochisensis</i>          | 0 |
| <i>Pellaea intermedia</i>           | 0 |
| <i>Pellaea marantae</i>             | 0 |
| <i>Pellaea rotundifolia</i>         | 0 |
| <i>Pellaea sargentii</i>            | 0 |
| <i>Pellaea sinuata</i>              | 0 |
| <i>Pellaea truncata</i>             | 0 |
| <i>Pellaea vestita</i>              | 0 |
| <i>Pentagramma triangularis</i>     | 0 |
| <i>Phanerophlebia nobilis</i>       | 0 |
| <i>Phanerosorus sarmentosus</i>     | 0 |
| <i>Phegopteris connectilis</i>      | 0 |
| <i>Phegopteris decursivepinnata</i> | 0 |
| <i>Phegopteris hexagonoptera</i>    | 0 |
| <i>Phlebodium areolatum</i>         | 1 |

|                                      |   |
|--------------------------------------|---|
| <i>Phlebodium decumanum</i>          | 1 |
| <i>Phlebodium pseudoaureum</i>       | 1 |
| <i>Pilularia globulifera</i>         | 0 |
| <i>Pilularia novae-hollandiae</i>    | 0 |
| <i>Pityrogramma austroamericana</i>  | 0 |
| <i>Pityrogramma calomelanos</i>      | 0 |
| <i>Pityrogramma chaerophylla</i>     | 0 |
| <i>Plagiogyria euphlesia</i>         | 0 |
| <i>Plagiogyria japonica</i>          | 0 |
| <i>Plagiogyria matsumureana</i>      | 0 |
| <i>Plagiogyria semicordata</i>       | 0 |
| <i>Platycterium alcicorne</i>        | 1 |
| <i>Platycterium andinum</i>          | 1 |
| <i>Platycterium bifurcatum</i>       | 1 |
| <i>Platycterium coronarium</i>       | 1 |
| <i>Platycterium elephantotis</i>     | 1 |
| <i>Platycterium ellisii</i>          | 1 |
| <i>Platycterium grande</i>           | 1 |
| <i>Platycterium hillii</i>           | 1 |
| <i>Platycterium holttumii</i>        | 1 |
| <i>Platycterium madagascariense</i>  | 1 |
| <i>Platycterium quadridichotomum</i> | 1 |
| <i>Platycterium ridleyi</i>          | 1 |

|                                       |   |
|---------------------------------------|---|
| <i>Platycerium stemaria</i>           | 1 |
| <i>Platycerium veitchii</i>           | 0 |
| <i>Platycerium wallichii</i>          | 1 |
| <i>Platycerium wandae</i>             | 1 |
| <i>Platycerium willinckii</i>         | 1 |
| <i>Pleocnemia rufinervis</i>          | 0 |
| <i>Pleopeltis angusta</i>             | 1 |
| <i>Pleopeltis astrolepis</i>          | 1 |
| <i>Pleopeltis bradeorum</i>           | 1 |
| <i>Pleopeltis buchtienii</i>          | 1 |
| <i>Pleopeltis christensenii</i>       | 1 |
| <i>Pleopeltis crassinervata</i>       | 1 |
| <i>Pleopeltis desvauxii</i>           | 1 |
| <i>Pleopeltis disjuncta</i>           | 1 |
| <i>Pleopeltis ensiformis</i>          | 1 |
| <i>Pleopeltis fraseri</i>             | 1 |
| <i>Pleopeltis friedrichsthalianum</i> | 1 |
| <i>Pleopeltis fructuosa</i>           | 1 |
| <i>Pleopeltis furfuraceum</i>         | 1 |
| <i>Pleopeltis intermedia</i>          | 1 |
| <i>Pleopeltis macrocarpa</i>          | 1 |
| <i>Pleopeltis marginata</i>           | 1 |
| <i>Pleopeltis monosora</i>            | 1 |

|                                    |   |
|------------------------------------|---|
| <i>Pleopeltis muenchii</i>         | 1 |
| <i>Pleopeltis myriolepis</i>       | 1 |
| <i>Pleopeltis platylepis</i>       | 1 |
| <i>Pleopeltis pleopeltifolia</i>   | 1 |
| <i>Pleopeltis polypodioides</i>    | 1 |
| <i>Pleopeltis pycnocarpa</i>       | 1 |
| <i>Pleopeltis rosei</i>            | 1 |
| <i>Pleopeltis rzedowskianum</i>    | 1 |
| <i>Pleopeltis sanctae-rosae</i>    | 1 |
| <i>Pleopeltis thyssanolepis</i>    | 0 |
| <i>Pleopeltis wiesbaurii</i>       | 1 |
| <i>Pleurosoriopsis makinoi</i>     | 1 |
| <i>Polybotrya alfredii</i>         | 0 |
| <i>Polybotrya caudata</i>          | 0 |
| <i>Polybotrya cervina</i>          | 0 |
| <i>Polybotrya guianensis</i>       | 0 |
| <i>Polybotrya sessilisora</i>      | 0 |
| <i>Polybotrya trianae</i>          | 0 |
| <i>Polyphlebium angustatum</i>     | 1 |
| <i>Polyphlebium borbonicum</i>     | 1 |
| <i>Polyphlebium endlicherianum</i> | 1 |
| <i>Polypodium adelphum</i>         | 1 |
| <i>Polypodium arcanum</i>          | 1 |

|                                        |   |
|----------------------------------------|---|
| <i>Polypodium chrysolepis</i>          | 1 |
| <i>Polypodium glycyrrhiza</i>          | 0 |
| <i>Polypodium hesperium</i>            | 0 |
| <i>Polypodium macaronesicum</i>        | 0 |
| <i>Polypodium martensii</i>            | 1 |
| <i>Polypodium pellucidum</i>           | 0 |
| <i>Polypodium plesiosorum</i>          | 1 |
| <i>Polypodium rhodopleuron</i>         | 1 |
| <i>Polypodium scouleri</i>             | 0 |
| <i>Polypodium subpetiolatum</i>        | 1 |
| <i>Polypodium vulgare</i>              | 1 |
| <i>Polystichopsis chaerophylloides</i> | 0 |
| <i>Polystichum acutidens</i>           | 0 |
| <i>Polystichum caducum</i>             | 0 |
| <i>Polystichum capillipes</i>          | 0 |
| <i>Polystichum conjunctum</i>          | 0 |
| <i>Polystichum craspedosorum</i>       | 0 |
| <i>Polystichum eximium</i>             | 0 |
| <i>Polystichum fraxinellum</i>         | 0 |
| <i>Polystichum glaciale</i>            | 0 |
| <i>Polystichum hillebrandii</i>        | 0 |
| <i>Polystichum hookerianum</i>         | 0 |
| <i>Polystichum lemmonii</i>            | 0 |

|                                   |   |
|-----------------------------------|---|
| <i>Polystichum luctuosum</i>      | 0 |
| <i>Polystichum munitum</i>        | 0 |
| <i>Polystichum neolobatum</i>     | 0 |
| <i>Polystichum omeiense</i>       | 0 |
| <i>Polystichum setiferum</i>      | 0 |
| <i>Polystichum tonkinense</i>     | 0 |
| <i>Polystichum transkeiense</i>   | 0 |
| <i>Polystichum tripteron</i>      | 0 |
| <i>Polystichum yunnanense</i>     | 0 |
| <i>Polytaenium cajenense</i>      | 1 |
| <i>Prosaptia alata</i>            | 1 |
| <i>Prosaptia contigua</i>         | 1 |
| <i>Prosaptia obliquata</i>        | 1 |
| <i>Prosaptia rhodocarpa</i>       | 1 |
| <i>Pseudophegopteris aurita</i>   | 0 |
| <i>Pseudophegopteris cruciata</i> | 0 |
| <i>Psilotum nudum</i>             | 1 |
| <i>Pteridium aquilinum</i>        | 0 |
| <i>Pteridium esculentum</i>       | 0 |
| <i>Pteridrys lofouensis</i>       | 0 |
| <i>Pteris arborea</i>             | 0 |
| <i>Pteris comans</i>              | 0 |
| <i>Pteris cretica</i>             | 0 |



|                               |   |
|-------------------------------|---|
| <i>Pteris ensiformis</i>      | 0 |
| <i>Pteris fauriei</i>         | 0 |
| <i>Pteris multifida</i>       | 0 |
| <i>Pteris pallens</i>         | 0 |
| <i>Pteris platyzomopsis</i>   | 0 |
| <i>Pteris praestantissima</i> | 0 |
| <i>Pteris propinqua</i>       | 0 |
| <i>Pteris quadriaurita</i>    | 0 |
| <i>Pteris tremula</i>         | 0 |
| <i>Pteris vittata</i>         | 0 |
| <i>Pterozonium brevifrons</i> | 0 |
| <i>Ptisana attenuata</i>      | 0 |
| <i>Ptisana fraxinea</i>       | 0 |
| <i>Ptisana oreades</i>        | 0 |
| <i>Ptisana purpurascens</i>   | 0 |
| <i>Ptisana salicina</i>       | 0 |
| <i>Pyrrrosia angustata</i>    | 1 |
| <i>Pyrrrosia assimilis</i>    | 1 |
| <i>Pyrrrosia christii</i>     | 1 |
| <i>Pyrrrosia foveolata</i>    | 1 |
| <i>Pyrrrosia linearifolia</i> | 1 |
| <i>Pyrrrosia lingua</i>       | 1 |
| <i>Pyrrrosia longifolia</i>   | 1 |

|                                    |   |
|------------------------------------|---|
| <i>Pyrrrosia niphoboloides</i>     | 1 |
| <i>Pyrrrosia nuda</i>              | 1 |
| <i>Pyrrrosia piloselloides</i>     | 1 |
| <i>Pyrrrosia polydactyla</i>       | 1 |
| <i>Pyrrrosia rasamalae</i>         | 1 |
| <i>Pyrrrosia rupestris</i>         | 1 |
| <i>Pyrrrosia serpens</i>           | 1 |
| <i>Pyrrrosia subfurfuracea</i>     | 1 |
| <i>Radiogrammitis havilandii</i>   | 1 |
| <i>Radiogrammitis hirtelloides</i> | 1 |
| <i>Radiogrammitis holttumii</i>    | 1 |
| <i>Radiogrammitis jagoriana</i>    | 1 |
| <i>Radiogrammitis parva</i>        | 1 |
| <i>Radiovittaria gardneriana</i>   | 1 |
| <i>Regnellidium diphyllum</i>      | 0 |
| <i>Rhachidosorus pulcher</i>       | 0 |
| <i>Rheopteris cheesmaniae</i>      | 1 |
| <i>Rumohra adiantiformis</i>       | 1 |
| <i>Saccoloma brasiliense</i>       | 0 |
| <i>Saccoloma elegans</i>           | 0 |
| <i>Saccoloma inaequale</i>         | 0 |
| <i>Salpichlaena hookeriana</i>     | 0 |
| <i>Salpichlaena thalassica</i>     | 0 |

|                               |   |
|-------------------------------|---|
| <i>Salpichlaena volubilis</i> | 0 |
| <i>Salvinia cucullata</i>     | 0 |
| <i>Salvinia minima</i>        | 0 |
| <i>Salvinia molesta</i>       | 0 |
| <i>Salvinia natans</i>        | 0 |
| <i>Salvinia oblongifolia</i>  | 0 |
| <i>Schizaea dichotoma</i>     | 0 |
| <i>Schizaea</i> sp.           | 0 |
| <i>Scleroglossum sulcata</i>  | 0 |
| <i>Selliguea brachypodia</i>  | 1 |
| <i>Selliguea dareiformis</i>  | 1 |
| <i>Selliguea enervis</i>      | 1 |
| <i>Selliguea hellwigii</i>    | 1 |
| <i>Selliguea heterocarpa</i>  | 1 |
| <i>Selliguea laciniata</i>    | 1 |
| <i>Selliguea lanceolata</i>   | 1 |
| <i>Selliguea plantaginea</i>  | 0 |
| <i>Selliguea triloba</i>      | 1 |
| <i>Serpocaulon adnatum</i>    | 1 |
| <i>Serpocaulon attenuatum</i> | 1 |
| <i>Serpocaulon catharinae</i> | 1 |
| <i>Serpocaulon dissimile</i>  | 1 |
| <i>Serpocaulon falcaria</i>   | 1 |

|                                     |   |
|-------------------------------------|---|
| <i>Serpocaulon fraxinifolium</i>    | 1 |
| <i>Serpocaulon funckii</i>          | 1 |
| <i>Serpocaulon lasiopus</i>         | 1 |
| <i>Serpocaulon loriciforme</i>      | 1 |
| <i>Serpocaulon meniscifolium</i>    | 1 |
| <i>Serpocaulon ptilorhizon</i>      | 1 |
| <i>Serpocaulon sessilifolium</i>    | 1 |
| <i>Serpocaulon silvulae</i>         | 1 |
| <i>Serpocaulon subandinum</i>       | 1 |
| <i>Serpocaulon triseriale</i>       | 1 |
| <i>Serpocaulon wagneri</i>          | 1 |
| <i>Serpocaulon wiesbaueri</i>       | 1 |
| <i>Sphaeropteris capitata</i>       | 0 |
| <i>Sphaeropteris celebica</i>       | 0 |
| <i>Sphaeropteris horrida</i>        | 0 |
| <i>Sphaeropteris medullaris</i>     | 0 |
| <i>Sphaeropteris robusta</i>        | 0 |
| <i>Sphenomeris clavata</i>          | 0 |
| <i>Stenochlaena milnei</i>          | 0 |
| <i>Stenochlaena tenuifolia</i>      | 0 |
| <i>Stenogrammitis hartii</i>        | 1 |
| <i>Stenogrammitis hildebrandtii</i> | 1 |
| <i>Stenogrammitis limula</i>        | 1 |

|                                    |   |
|------------------------------------|---|
| <i>Stenogrammitis myosuroides</i>  | 1 |
| <i>Stenogrammitis oosora</i>       | 1 |
| <i>Stenogrammitis prionodes</i>    | 1 |
| <i>Stenogrammitis pumila</i>       | 1 |
| <i>Stenogrammitis saffordii</i>    | 1 |
| <i>Stenogrammitis subcoriacea</i>  | 1 |
| <i>Stenogrammitis wittigiana</i>   | 1 |
| <i>Sticherus laevigatus</i>        | 0 |
| <i>Sticherus palmatus</i>          | 0 |
| <i>Stigmatopteris lechleri</i>     | 0 |
| <i>Stigmatopteris longicaudata</i> | 0 |
| <i>Stromatopteris moniliformis</i> | 0 |
| <i>Synammia feuillei</i>           | 1 |
| <i>Synammia intermedia</i>         | 1 |
| <i>Tapeinidium luzonicum</i>       | 0 |
| <i>Tapeinidium moorei</i>          | 0 |
| <i>Tapeinidium pinnatum</i>        | 0 |
| <i>Tectaria apiifolia</i>          | 0 |
| <i>Tectaria decurrens</i>          | 0 |
| <i>Tectaria devexa</i>             | 0 |
| <i>Tectaria fimbriata</i>          | 0 |
| <i>Tectaria fuscipes</i>           | 0 |
| <i>Tectaria harlandii</i>          | 0 |

|                                   |   |
|-----------------------------------|---|
| <i>Tectaria incisa</i>            | 0 |
| <i>Tectaria nayarii</i>           | 0 |
| <i>Tectaria prolifera</i>         | 0 |
| <i>Tectaria subtriphylla</i>      | 0 |
| <i>Tectaria trifoliata</i>        | 0 |
| <i>Tectaria variolosa</i>         | 0 |
| <i>Tectaria zeilanica</i>         | 0 |
| <i>Telmatoblechnum serrulatum</i> | 0 |
| <i>Teratophyllum wilkesianum</i>  | 0 |
| <i>Terpsichore eggersii</i>       | 1 |
| <i>Terpsichore hanekeana</i>      | 1 |
| <i>Terpsichore lehmanniana</i>    | 1 |
| <i>Thelypteris abrupta</i>        | 0 |
| <i>Thelypteris affinis</i>        | 0 |
| <i>Thelypteris ciliata</i>        | 0 |
| <i>Thelypteris clypeolutata</i>   | 0 |
| <i>Thelypteris consanguinea</i>   | 0 |
| <i>Thelypteris dayi</i>           | 0 |
| <i>Thelypteris dentata</i>        | 0 |
| <i>Thelypteris ecallosa</i>       | 0 |
| <i>Thelypteris erubescens</i>     | 0 |
| <i>Thelypteris esquirolii</i>     | 0 |
| <i>Thelypteris gemmulifera</i>    | 0 |

|                                   |   |
|-----------------------------------|---|
| <i>Thelypteris glandulosa</i>     | 0 |
| <i>Thelypteris griffithii</i>     | 0 |
| <i>Thelypteris interrupta</i>     | 0 |
| <i>Thelypteris limbosperma</i>    | 0 |
| <i>Thelypteris longissima</i>     | 0 |
| <i>Thelypteris noveboracensis</i> | 0 |
| <i>Thelypteris oligocarpa</i>     | 0 |
| <i>Thelypteris opulenta</i>       | 0 |
| <i>Thelypteris ovata</i>          | 0 |
| <i>Thelypteris palustris</i>      | 0 |
| <i>Thelypteris poiteana</i>       | 0 |
| <i>Thelypteris pozoi</i>          | 0 |
| <i>Thelypteris reticulata</i>     | 0 |
| <i>Thelypteris seemannii</i>      | 0 |
| <i>Thelypteris simplex</i>        | 0 |
| <i>Thelypteris taiwanensis</i>    | 0 |
| <i>Thelypteris uraiensis</i>      | 0 |
| <i>Thelypteris xylodes</i>        | 0 |
| <i>Themelium conjunctisorum</i>   | 1 |
| <i>Thylacopteris papillosa</i>    | 1 |
| <i>Thyrsopteris elegans</i>       | 0 |
| <i>Tmesipteris tannensis</i>      | 1 |
| <i>Todea barbara</i>              | 0 |

|                                   |   |
|-----------------------------------|---|
| <i>Tricholepidium maculosum</i>   | 1 |
| <i>Trichomanes alatum</i>         | 0 |
| <i>Trichomanes ankersii</i>       | 0 |
| <i>Trichomanes arbuscula</i>      | 0 |
| <i>Trichomanes crispum</i>        | 0 |
| <i>Trichomanes elegans</i>        | 0 |
| <i>Trichomanes hostmannianum</i>  | 0 |
| <i>Trichomanes lucens</i>         | 1 |
| <i>Trichomanes osmundoides</i>    | 0 |
| <i>Trichomanes pinnatum</i>       | 0 |
| <i>Trichomanes scandens</i>       | 0 |
| <i>Triplophyllum funestum</i>     | 0 |
| <i>Tryonia myriophylla</i>        | 0 |
| <i>Vandenboschia davallioides</i> | 0 |
| <i>Vandenboschia radicans</i>     | 0 |
| <i>Vittaria graminifolia</i>      | 1 |
| <i>Vittaria lineata</i>           | 1 |
| <i>Woodsia ilvensis</i>           | 0 |
| <i>Woodsia manchuriensis</i>      | 0 |
| <i>Woodsia obtusa</i>             | 0 |
| <i>Woodsia polystichoides</i>     | 0 |
| <i>Woodwardia areolata</i>        | 0 |
| <i>Woodwardia fimbriata</i>       | 0 |



|                              |   |
|------------------------------|---|
| <i>Woodwardia japonica</i>   | 0 |
| <i>Woodwardia kempii</i>     | 0 |
| <i>Woodwardia prolifera</i>  | 0 |
| <i>Woodwardia unigemmata</i> | 0 |
| <i>Woodwardia virginica</i>  | 0 |

## References

1. Scotese, C. R. 3D paleogeographic and plate tectonic reconstructions: The PALEOMAP Project is back in town. *Houst. Geol. Soc. Bull.* **44**, 13–15 (2002).
2. Smith, W. H. F. & Sandwell, D. T. Global sea floor topography from satellite altimetry and ship depth soundings. *Science* **277**, 1956–1962 (1997).
3. Lythe, M. B. & Vaughan, D. G. BEDMAP–bed topography of the Antarctic. (British Antarctic Survey, Natural Environment Research Council, 2000).
4. Jakobsson, M., Macnab, R., Cherkis, N. & Schenke, H.-W. The international bathymetric chart of the Arctic ocean (IBCAO). (Research Publication RP-2, National Geophysical Data Center, 2004).
5. Scotese, C. R. PALEOMAP PaleoAtlas for GPlates and the PaleoData Plotter Program, PALEOMAP Project, <http://www.earthbyte.org/paleomap-paleoatlas-for-gplates/>. (2016).
6. Ziegler, A. M. A proposal to produce an atlas of paleogeographic maps. (Department of Geophysical Sciences, University of Chicago, 1975).
7. Ziegler, A. M. & Scotese, C. R. Thoughts on format for the forthcoming ‘Atlas of Paleogeographic Maps’. (Department of Geophysical Sciences, University of Chicago, 1977).
8. Ziegler, A. M. *et al.* Paleogeographic interpretation: with an example from the Mid-Cretaceous.

- Annu. Rev. Earth Planet. Sci.* **13**, 385–425 (1985).
9. Rees, P. M. *et al.* Permian phytogeographic patterns and climate data/model comparisons. *J. Geol.* **110**, 1–31 (2002).
  10. Rees, P. M., Ziegler, A. M. & Valdes, P. J. in *Warm Climates in Earth History* (eds. Huber, B. T., Macleod, K. G. & Wing, S. L.) 297–318 (Cambridge University Press, 2000).
  11. Scotese, C. R. *Atlas of Plate Tectonic Reconstructions (Mollweide Projection), Volumes 1-6*. <https://www.academia.edu/9712803/>. (PALEOMAP Project, Evanston, IL., 2014).
  12. Peltier, W. R. Global glacial isostasy and the surface of the ice-age Earth: The ICE-5G (VM2) Model and GRACE. *Annu. Rev. Earth Planet. Sci.* **32**, 111–149 (2004).
  13. Stewart, W. N. & Rothwell, G. W. *Paleobotany and the evolution of plants*. (Cambridge University Press, 1993).
  14. Taylor, E. L., Taylor, T. N. & Krings, M. *Paleobotany: the biology and evolution of fossil plants*. (Academic Press, 2009).
  15. Rothwell, G. W. & Nixon, K. C. How does the inclusion of fossil data change our conclusions about the phylogenetic history of euphyllophytes? *Int. J. Plant Sci.* **167**, 737–749 (2006).
  16. Pryer, K. M. *et al.* Phylogeny and evolution of ferns (monilophytes) with a focus on the early leptosporangiate divergences. *Am. J. Bot.* **91**, 1582–1598 (2004).
  17. Schneider, H. *et al.* Ferns diversified in the shadow of angiosperms. *Nature* **428**, 553–557 (2004).
  18. Fiz-Palacios, O., Schneider, H., Heinrichs, J. & Savolainen, V. Diversification of land plants: insights from a family-level phylogenetic analysis. *BMC Evol. Biol.* **11**, 1–10 (2011).
  19. Kenrick, P. & Crane, P. R. The origin and early evolution of plants on land. *Nature* **389**, 33–39 (1997).
  20. Carpenter, R. Early tertiary *Tmesipteris* (Psilotaceae) macrofossil from Tasmania. *Aust. Syst. Bot.* **1**, 171–176 (1988).

21. Lehtonen, S. Towards resolving the complete fern tree of life. *PLoS ONE* **6**, e24851 (2011).
22. Rothwell, G. W. & Stockey, R. A. Fossil Ophioglossales in the Paleocene of western North America. *Am. J. Bot.* **76**, 637–644 (1989).
23. Liu, Z., Hilton, J. & Li, C. Review on the origin, evolution and phylogeny of Marattiales. *Chin. Bull. Bot.* **17**, 39–52 (2000).
24. Murdock, A. G. A taxonomic revision of the eusporangiate fern family Marattiaceae, with description of a new genus *Ptisana*. *Taxon* **57**, 737–755 (2008).
25. Wang, Y. Fertile organs and in situ spores of *Marattia asiatica* (Kawasaki) Harris (Marattiales) from the Lower Jurassic Hsiangchi Formation in Hubei, China. *Rev. Palaeobot. Palynol.* **107**, 125–144 (1999).
26. Murdock, A. G. Phylogeny of marattioid ferns (Marattiaceae): inferring a root in the absence of a closely related outgroup. *Am. J. Bot.* **95**, 626–641 (2008).
27. Hill, C. Jurassic *Angiopteris* (Marattiales) from North Yorkshire. *Rev. Palaeobot. Palynol.* **51**, 65–93 (1987).
28. Bek, J. & Pšenička, J. *Senftenbergia plumosa* (Artis) emend. and its spores from the Carboniferous of the Kladno and Pilsen basins, Bohemian Massif, and some related and synonymous taxa. *Rev. Palaeobot. Palynol.* **116**, 213–232 (2001).
29. Wang, S.-J., Hilton, J., He, X.-Y., Seyfullah, L. J. & Shao, L. The anatomically preserved stem *Zhongmingella* gen. nov. from the Upper Permian of China: evaluating the early evolution and phylogeny of the Osmundales. *J. Syst. Palaeontol.* **12**, 1–22 (2014).
30. Rößler, R. & Galtier, J. First *Grammatopteris* tree ferns from the Southern Hemisphere—new insights in the evolution of the Osmundaceae from the Permian of Brazil. *Rev. Palaeobot. Palynol.* **121**, 205–230 (2002).
31. Schuettpelz, E. & Pryer, K. M. Evidence for a Cenozoic radiation of ferns in an angiosperm-

- dominated canopy. *Proc. Natl. Acad. Sci.* **106**, 11200–11205 (2009).
32. Phipps, C. *et al.* *Osmunda* (Osmundaceae) from the Triassic of Antarctica: an example of evolutionary stasis. *Am. J. Bot.* **85**, 888–895 (1998).
  33. Metzgar, J. S., Skog, J. E., Zimmer, E. A. & Pryer, K. M. The paraphyly of *Osmunda* is confirmed by phylogenetic analyses of seven plastid loci. *Syst. Bot.* **33**, 31–36 (2008).
  34. Miller, C. N. *Evolution of the fern family Osmundaceae based on anatomical studies*. (Museum of Paleontology, U. of Michigan, 1971).
  35. Jud, N. A., Rothwell, G. W. & Stockey, R. A. *Todea* from the Lower Cretaceous of western North America: implications for the phylogeny, systematics, and evolution of modern Osmundaceae. *Am. J. Bot.* **95**, 330–339 (2008).
  36. Serbet, R. & Rothwell, G. W. *Osmunda cinnamomea* (Osmundaceae) in the Upper Cretaceous of western North America: additional evidence for exceptional species longevity among filicalean ferns. *Int. J. Plant Sci.* **160**, 425–433 (1999).
  37. Miller, C. N. *Evolution of the fern genus Osmunda*. (Museum of Paleontology, University of Michigan, 1967).
  38. Axsmith, B. J., Krings, M. & Taylor, T. N. A filmy fern from the Upper Triassic of North Carolina (USA). *Am. J. Bot.* **88**, 1558–1567 (2001).
  39. Klavins, S. D., Taylor, T. N. & Taylor, E. L. Matoniaceous ferns (Gleicheniales) from the middle Triassic of Antarctica. *J. Paleontol.* **78**, 211–217 (2004).
  40. Herendeen, P. S. & Skog, J. E. *Gleichenia chaloneri*-a new fossil fern from the lower Cretaceous (Albian) of England. *Int. J. Plant Sci.* 870–879 (1998).
  41. Gandolfo, M., Nixon, K., Crepet, W. & Ratcliffe, G. A new fossil fern assignable to Gleicheniaceae from Late Cretaceous sediments of New Jersey. *Am. J. Bot.* **84**, 483–483 (1997).
  42. Wikström, N., Kenrick, P. & Vogel, J. C. Schizaeaceae: a phylogenetic approach. *Rev.*

- Palaeobot. Palynol.* **119**, 35–50 (2002).
43. Rothwell, G. W. Complex Paleozoic Filicales in the evolutionary radiation of ferns. *Am. J. Bot.* **74**, 458–461 (1987).
  44. Kvaček, J., Dašková, J. & Renáta, P. A new schizaeaceous fern, *Schizaeopsis ekrtii* sp. nov., and its in situ spores from the Upper Cretaceous (Cenomanian) of the Czech Republic. *Rev. Palaeobot. Palynol.* **140**, 51–60 (2006).
  45. Skog, J. E. The relationship of the fossil fern *Schizaeopsis* Berry to modern genera in the Schizaeaceae. *Am. Fern J.* **83**, 20–29 (1993).
  46. Hernandez-Castillo, G. R., Stockey, R. A. & Rothwell, G. W. *Anemia quatsinoensis* sp. nov. (Schizaeaceae), a permineralized fern from the Lower Cretaceous of Vancouver Island. *Int. J. Plant Sci.* **167**, 665–674 (2006).
  47. Dettmann, M. E. & Clifford, H. T. Phylogeny and biogeography of *Ruffordia*, *Mohria* and *Anemia* (Schizaeaceae) and *Ceratopteris* (Pteridaceae): evidence from in situ and dispersed spores. *Alcheringa* **16**, 269–314 (1992).
  48. Skog, J. E. The lower cretaceous ferns in the genus *Anemia* (Schizaeaceae), Potomac group of Virginia, and relationships within the genus. *Rev. Palaeobot. Palynol.* **70**, 279–295 (1992).
  49. Yamada, T. & Kato, M. *Regnellites nagashimae* gen. et sp. nov., the oldest macrofossil of Marsileaceae, from the Upper Jurassic to Lower Cretaceous of western Japan. *Int. J. Plant Sci.* **163**, 715–723 (2002).
  50. Lupia, R., Schneider, H., Moeser, G., Pryer, K. & Crane, P. Marsileaceae sporocarps and spores from the Late Cretaceous of Georgia, USA. *Int. J. Plant Sci.* **161**, 975–988 (2000).
  51. Hu, S., Taylor, D. W., Brenner, G. J. & others. A new marsilealean fern species from the Early Cretaceous of Jordan. *Palaeoworld* **17**, 235–245 (2008).
  52. Nagalingum, N. S., Nowak, M. D. & Pryer, K. M. Assessing phylogenetic relationships in extant

- heterosporous ferns (Salviniales), with a focus on *Pilularia* and *Salvinia*. *Bot. J. Linn. Soc.* **157**, 673–685 (2008).
53. Collinson, M. E. in *Pollen and spores* (eds. Blackmore, S. & Barnes, S. H.) 119–150 (Clarendon, Oxford, 1991).
54. Metzgar, J. S., Schneider, H. & Pryer, K. M. Phylogeny and divergence time estimates for the fern genus *Azolla* (Salviniaceae). *Int. J. Plant Sci.* **168**, 1045–1053 (2007).
55. Skog, J. E. *Loxsopteris anasilla*, a new fossil fern rhizome from the Cretaceous of Maryland. *Am. Fern J.* **66**, 8–14 (1976).
56. Collinson, M. E. in *Pteridology in Perspective* (eds. Camus, J., Gibby, M. & Johns, R. J.) 349–394 (Royal Botanic Gardens, Kew, 1996).
57. Cantrill, D. J. Early Cretaceous fern foliage from President Head, Snow Island, Antarctica. *Alcheringa* **22**, 241–258 (1998).
58. Smith, S. Y., Rothwell, G. W. & Stockey, R. A. *Cyathea cranhamii* sp. nov. (Cyatheaceae), anatomically preserved tree fern sori from the Lower Cretaceous of Vancouver Island, British Columbia. *Am. J. Bot.* **90**, 755–760 (2003).
59. Nishida, H. Structure and affinities of the petrified plants from the Cretaceous of Japan and Saghalien, V. Tree fern stems from Hokkaido, *Paracyathocaulis ogurae* gen. et comb. nov. and *Cyathocaulis yezoapteroides* sp. nov. *Bot. Mag.* **102**, 255–282 (1989).
60. Lantz, T. C., Rothwell, G. W. & Stockey, R. A. *Conantiopteris schuchmanii*, gen. et sp. nov., and the role of fossils in resolving the phylogeny of Cyatheaceae sl. *J. Plant Res.* **112**, 361–381 (1999).
61. Schneider, H. & Kenrick, P. An Early Cretaceous root-climbing epiphyte (Lindsaeaceae) and its significance for calibrating the diversification of polypodiaceous ferns. *Rev. Palaeobot. Palynol.* **115**, 33–41 (2001).

62. Tidwell, W. D. & Ash, S. R. A review of selected triassic to Early Cretaceous ferns. *J. Plant Res.* **107**, 417–442 (1994).
63. Krassilov, V. & Bacchia, F. Cenomanian florule of Nammoura, Lebanon. *Cretac. Res.* **21**, 785–799 (2000).
64. Bonde, S. D. & Kumaran, K. The oldest macrofossil record of the mangrove fern *Acrostichum* L. from the Late Cretaceous Deccan Intertrappean beds of India. *Cretac. Res.* **23**, 149–152 (2002).
65. Serbet, R. & Rothwell, G. W. Anatomically preserved ferns from the Late Cretaceous of western North America: Dennstaedtiaceae. *Int. J. Plant Sci.* **164**, 1041–1051 (2003).
66. Page, C. The taxonomy and phytogeography of bracken—a review. *Bot. J. Linn. Soc.* **73**, 1–34 (1976).
67. Der, J. P., Thomson, J. A., Stratford, J. K. & Wolf, P. G. Global chloroplast phylogeny and biogeography of bracken (*Pteridium*; Dennstaedtiaceae). *Am. J. Bot.* **96**, 1041–1049 (2009).
68. Su, T. *et al.* A new *Drynaria* (Polypodiaceae) from the upper Pliocene of Southwest China. *Rev. Palaeobot. Palynol.* **164**, 132–142 (2011).
69. Skog, J. E. Biogeography of Mesozoic leptosporangiate ferns related to extant ferns. *Brittonia* **53**, 236–269 (2001).
70. Deng, S. Ecology of the Early Cretaceous ferns of northeast China. *Rev. Palaeobot. Palynol.* **119**, 93–112 (2002).
71. Rothwell, G. W. & Stockey, R. A. Combining characters of Pteridaceae and tree ferns: *Pterisorus radiata* gen. et sp. nov., a permineralized Lower Cretaceous filicalean with radial sori. *Int. J. Plant Sci.* **167**, 695–701 (2006).
72. Collinson, M. E. Cainozoic ferns and their distribution. *Brittonia* **53**, 173–235 (2001).
73. Smith, A. R. & Cranfill, R. B. Intrafamilial relationships of the thelypteroid ferns (Thelypteridaceae). *Am. Fern J.* **92**, 131–149 (2002).

74. Rothwell, G. W. & Stockey, R. A. *Onoclea sensibilis* in the Paleocene of North America, a dramatic example of structural and ecological stasis. *Rev. Palaeobot. Palynol.* **70**, 113–124 (1991).
75. Wang, Q., Ablayev, A. G., Wang, Y. & Li, C. Paleocene Wuyun flora in northeast China: *Woodwardia bureiensis*, *Dryopteris* sp. and *Osmunda sachalinensis*. *Acta Phytotaxon. Sin.* **44**, 712–720 (2005).
76. Pigg, K. B. & Rothwell, G. W. Anatomically preserved *Woodwardia virginica* (Blechnaceae) and a new filiclean fern from the middle Miocene Yakima Canyon flora of central Washington, USA. *Am. J. Bot.* **88**, 777–787 (2001).
77. Borgardt, S. J. & Pigg, K. B. Anatomical and developmental study of petrified *Quercus* (Fagaceae) fruits from the Middle Miocene, Yakima Canyon, Washington, USA. *Am. J. Bot.* **86**, 307–325 (1999).
78. Stockey, R. A., Nishida, H. & Rothwell, G. W. Permineralized ferns from the middle Eocene Princeton chert. I. *Makotopteris princetonensis* gen. et sp. nov. (Athyriaceae). *Int. J. Plant Sci.* **160**, 1047–1055 (1999).
79. Scotese, C. R. *PointTracker, PALEOMAP Project, University of Texas at Arlington.* (2004).
80. Silvestro, D., Cascales-Miñana, B., Bacon, C. D. & Antonelli, A. Revisiting the origin and diversification of vascular plants through a comprehensive Bayesian analysis of the fossil record. *New Phytol.* **207**, 425–436 (2015).
81. Scotese, C. R. *Some thoughts on global climate change: the transition from icehouse to hothouse, in the Earth history: the evolution of the Earth system.* <https://www.academia.edu/12082909/>. (PALEOMAP Project, Evanston, IL., 2016).
82. Berner, R. A. & Kothavala, Z. Geocarb III: a revised model of atmospheric CO<sub>2</sub> over Phanerozoic time. *Am. J. Sci.* **301**, 182–204 (2001).



83. Berner, R. A. Phanerozoic atmospheric oxygen: new results using the GEOCARBSULF model. *Am. J. Sci.* **309**, 603–606 (2009).
84. Snedden, J. W. & Liu, C. A compilation of Phanerozoic sea-level change, coastal onlaps and recommended sequence designations. *Search and Discovery Article 40594* (2010).
85. Gastil, R. G. The distribution of mineral dates in time and space. *Am. J. Sci.* **258**, 1–35 (1960).
86. Brink, H.-J. Periodic signals of the Milky Way concealed in terrestrial sedimentary basin fills and in planetary magmatism? *Int. J. Geosci.* **6**, 831–845 (2015).
87. Cogné, J.-P. & Humler, E. Global scale patterns of continental fragmentation: Wilson’s cycles as a constraint for long-term sea-level changes. *Earth Planet. Sci. Lett.* **273**, 251–259 (2008).
88. Large, R. R. *et al.* Cycles of nutrient trace elements in the Phanerozoic ocean. *Gondwana Res.* **28**, 1282–1293 (2015).
89. Long, J. A. *et al.* Severe selenium depletion in the Phanerozoic oceans as a factor in three global mass extinction events. *Gondwana Res.* **36**, 209–218 (2015).
90. Rabosky, D. L. *et al.* Rates of speciation and morphological evolution are correlated across the largest vertebrate radiation. *Nat Commun* **4**, (2013).
91. Rabosky, D. L. Automatic detection of key innovations, rate shifts, and diversity-dependence on phylogenetic trees. *PLoS ONE* **9**, e89543 (2014).
92. Team, R. C. *R: a language and environment for statistical computing. Vienna, Austria; 2015.* (2015).

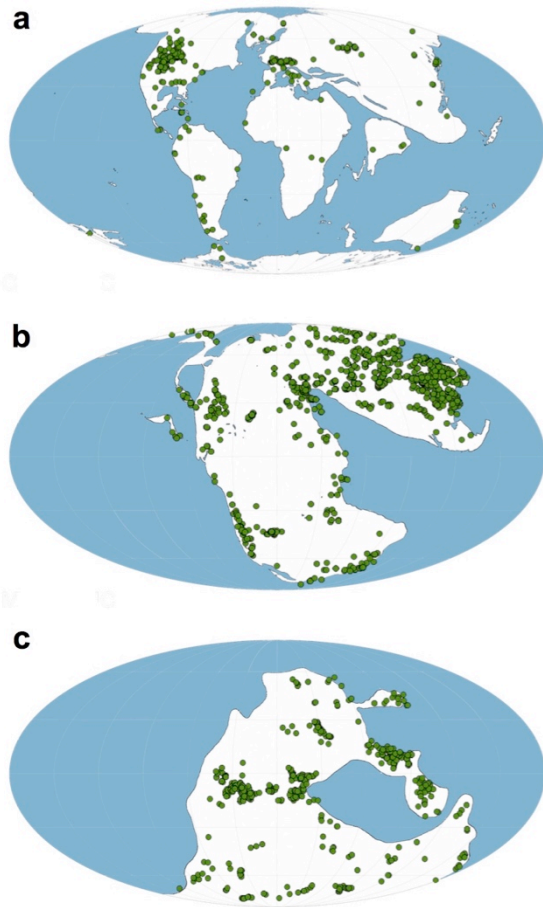

**Supplementary Figure 1. Paleodistribution of the fossil data used in this study.** Maps show continental positions at **a**, 50 Ma, **b**, 180 Ma and **c**, 320 Ma<sup>5</sup>, and green dots show locations of fern fossils with mean age estimate falling between **a**, 99.6 and 0 Ma, **b**, 251 and 99.6 Ma and **c**, 388 and 251 Ma. Maps are based on PALEOMAP Global Plate Tectonic Model<sup>5</sup> and were created using Adobe Photoshop CC 2015, PointTracker<sup>79</sup> and QGIS v. 2.0.1 (<http://www.qgis.org>).

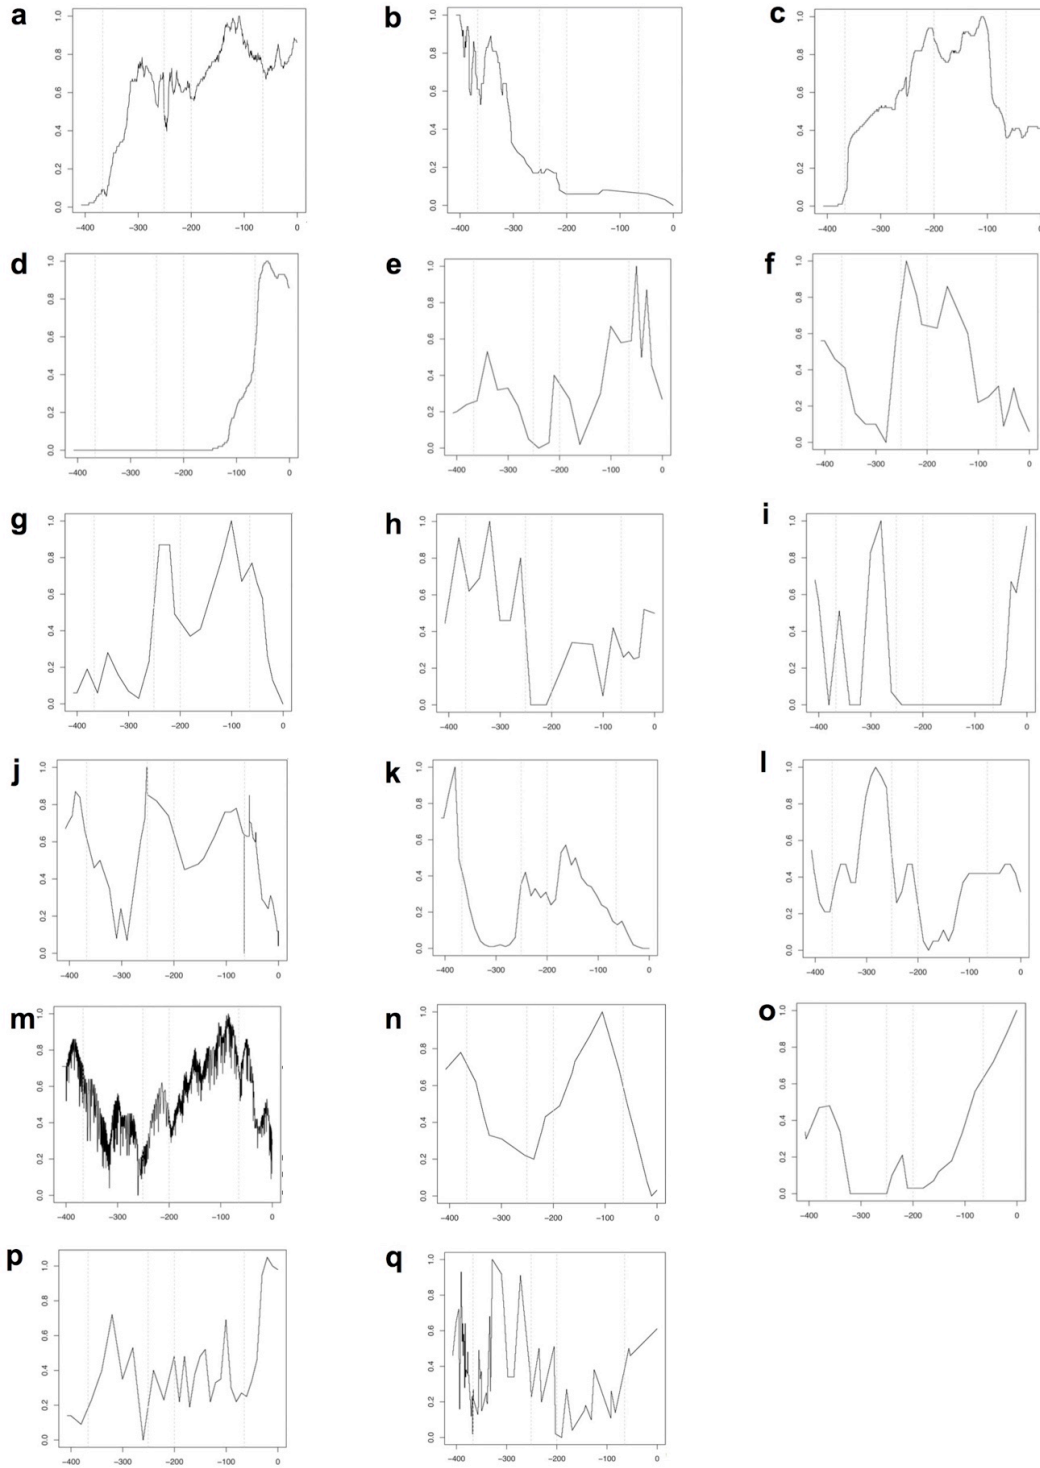

**Supplementary Figure 2. Paleoenvironmental trajectories used in this study.** Diversity of **a**, ferns, **b**, lycophytes etc. (free-sporing vascular plants excluding ferns), **c**, gymnosperms<sup>80</sup>, **d**, angiosperms<sup>80</sup>. Extent of the biomes: **e**, wet tropical, **f**, arid, **g**, warm temperate, **h**, cool temperate, **i**, polar. **j**, Global

mean temperature<sup>81</sup>. **k**, Atmospheric CO<sub>2</sub><sup>82</sup>. **l**, Atmospheric O<sub>2</sub><sup>83</sup>. **m**, Eustatic sealevel<sup>84</sup>. **n**, Magmatic activity<sup>85,86</sup>. **o**, Continental fragmentation<sup>87</sup>. **p**, Mountain area. **q**, Selenium concentration in marine sediments<sup>88,89</sup>.

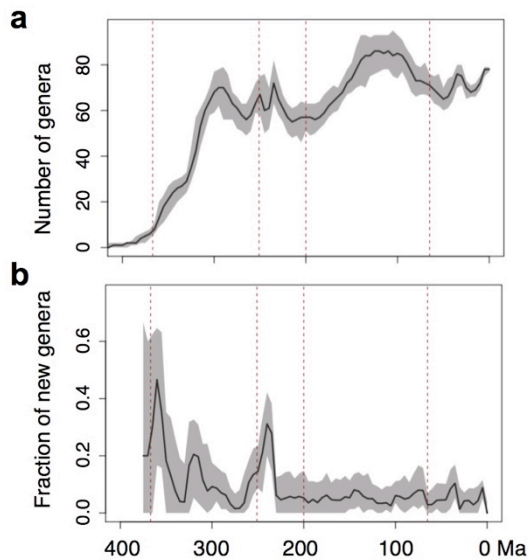

**Supplementary Figure 3. Dynamics of fern generic diversity through time.** **a**, The range-through diversity trajectory of sampled genera based on the estimated times of origination and extinction. **b**, The amount of turnover calculated as the fraction of new genera originating in a 5 Ma time bin out of the total number of genera recorded within the time bin. Global mass extinction events are indicated by dotted red lines.

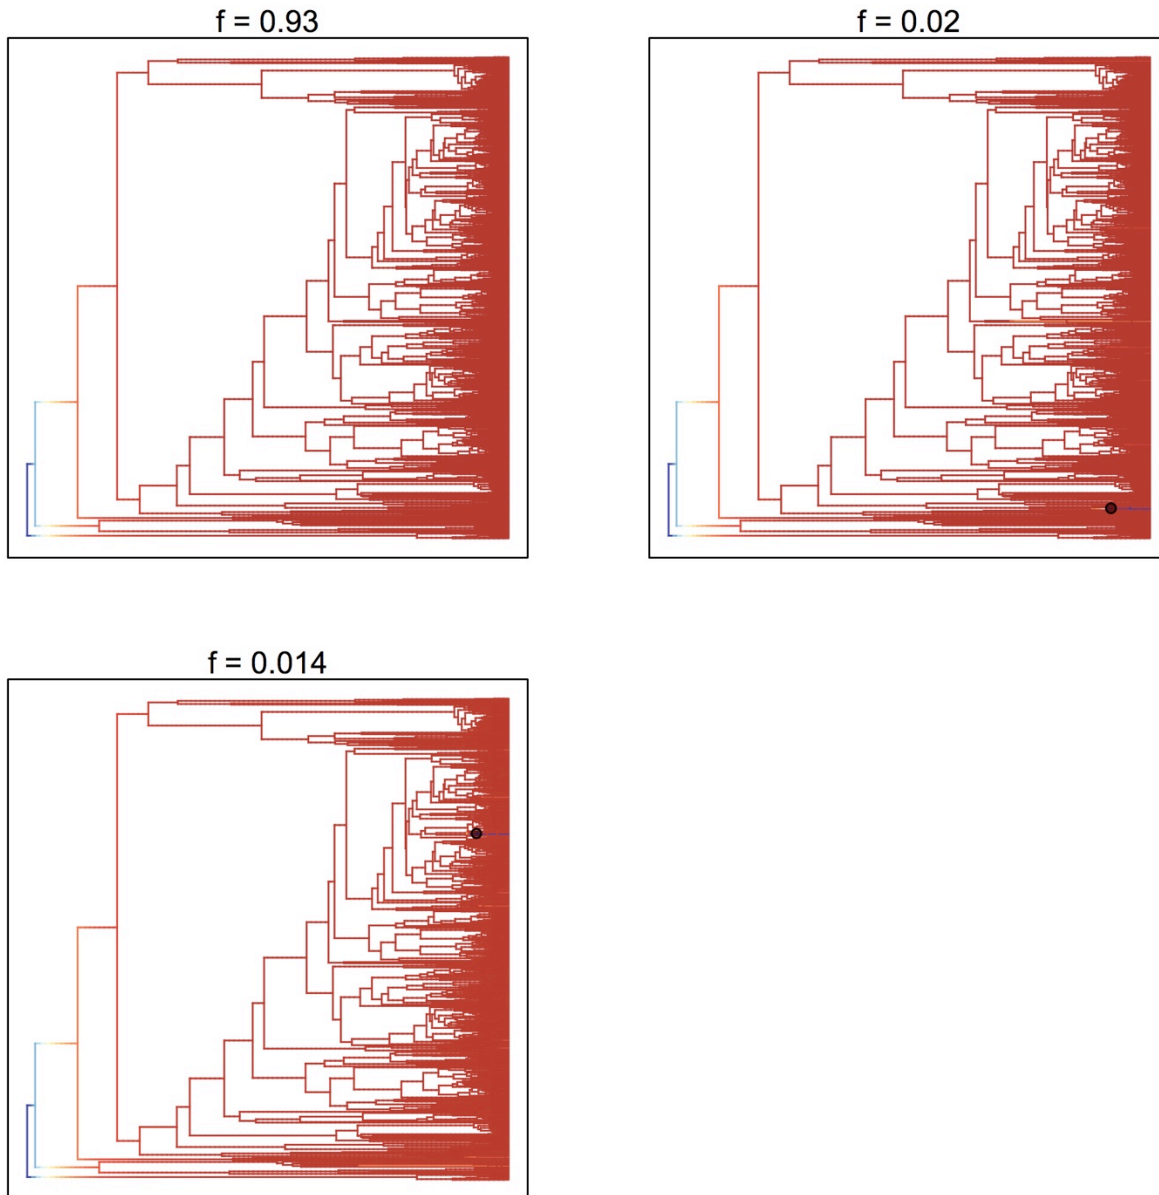

**Supplementary Figure 4. Rates of climatic niche evolution in ferns.** The three rate shift configurations in the 95% credible set of shift configurations with their overall frequencies for the evolution of climatic niche across the fern phylogeny as estimated with BAMM<sup>90,91</sup>. No rate changes are supported by the most frequent configuration.

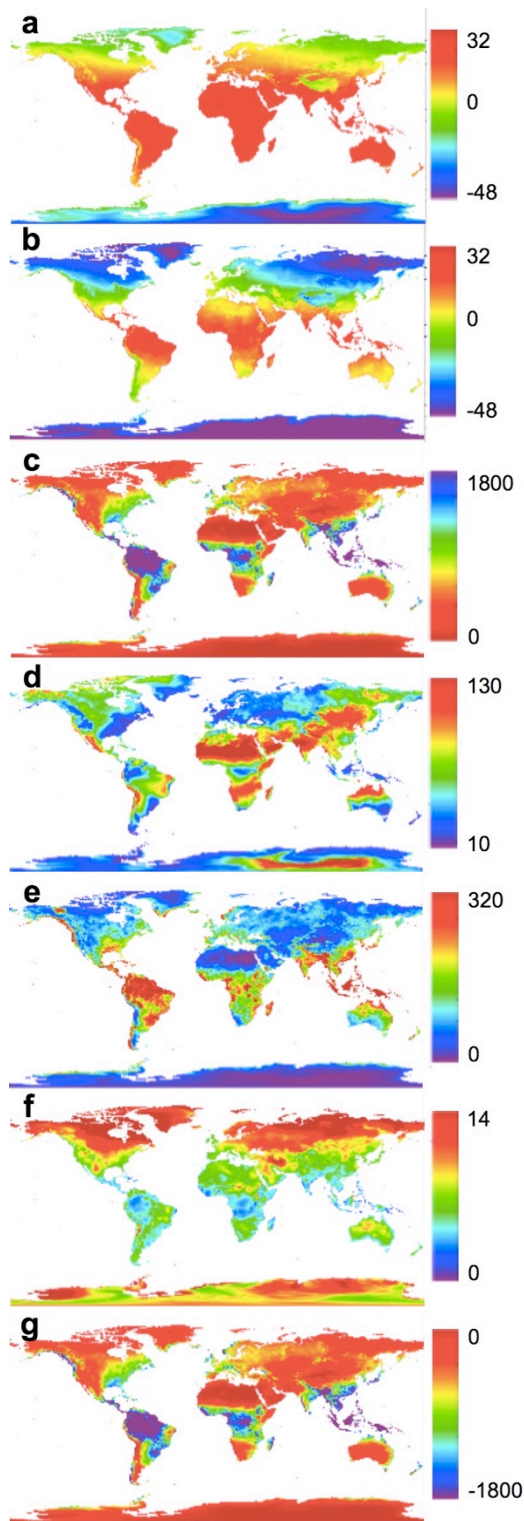

**Supplementary Figure 5. Climatic niche components.** **a**, Bio1 (annual mean temperature). **b**, Bio6 (min temperature of coldest month). **c**, Bio12 (annual precipitation). **d**, Bio15 (precipitation

seasonality). **e**, interannual precipitation variation. **f**, interannual temperature variation. **g**, The first principal component of the four climatic layers. Maps were created using the statistical programming language R<sup>92</sup>.

**Supplementary Table 1. Origination and extinction times of fern genera as estimated from the fossil record.**

| Taxon                        | Origination (Ma) |        |        | Extinction (Ma) |        |        |
|------------------------------|------------------|--------|--------|-----------------|--------|--------|
|                              | Mean             | 95% CI |        | Mean            | 95% CI |        |
| <b>Pseudoborniales</b>       |                  |        |        |                 |        |        |
| <i>Pseudobornia</i>          | 380.00           | 362.36 | 398.57 | 363.64          | 354.79 | 381.90 |
| <b>Sphenophyllales</b>       |                  |        |        |                 |        |        |
| <i>Bowmanites</i>            | 355.29           | 337.24 | 370.08 | 270.04          | 255.15 | 279.11 |
| <i>Cheirostrobos</i>         | 346.63           | 336.67 | 366.44 | 321.23          | 286.22 | 339.06 |
| <i>Eviostachya</i>           | 369.36           | 364.78 | 374.94 | 360.55          | 358.99 | 363.61 |
| <i>Gondwanophyton</i>        | 299.73           | 272.76 | 345.26 | 267.47          | 245.05 | 288.86 |
| <i>Hamatophyton</i>          | 382.99           | 372.41 | 393.02 | 363.52          | 359.01 | 374.80 |
| <i>Lilpopia</i>              | 316.00           | 299.22 | 350.83 | 269.95          | 245.56 | 296.91 |
| <i>Parasphenophyllum</i>     | 317.15           | 304.02 | 358.17 | 292.42          | 252.87 | 305.93 |
| <i>Peltastrobos</i>          | 319.78           | 300.04 | 359.79 | 294.69          | 252.76 | 317.22 |
| <i>Rotafolia</i>             | 369.52           | 359.07 | 379.25 | 362.70          | 353.10 | 373.93 |
| <i>Sentistrobos</i>          | 314.56           | 299.03 | 355.03 | 289.63          | 251.82 | 305.85 |
| <i>Sphenophyllostachys</i>   | 346.86           | 315.60 | 370.82 | 291.06          | 257.32 | 303.08 |
| <i>Sphenophyllum</i>         | 367.70           | 364.81 | 370.39 | 251.55          | 250.65 | 252.63 |
| <i>Xihuphyllum</i>           | 374.49           | 359.15 | 388.91 | 368.15          | 358.98 | 384.61 |
| <b>Equisetales</b>           |                  |        |        |                 |        |        |
| <i>Annularia</i>             | 349.23           | 328.28 | 365.23 | 247.83          | 243.79 | 252.15 |
| <i>Archaeocalamites</i>      | 359.91           | 352.90 | 366.27 | 281.60          | 274.52 | 289.31 |
| <i>Arthropitys</i>           | 334.59           | 317.83 | 357.60 | 246.31          | 241.83 | 250.73 |
| <i>Asterophyllites</i>       | 358.83           | 356.59 | 360.29 | 257.64          | 251.75 | 264.38 |
| <i>Austroannularia</i>       | 288.81           | 272.65 | 319.47 | 250.69          | 240.64 | 259.59 |
| <i>Bengaliaraniganjensis</i> | 301.34           | 271.34 | 345.38 | 270.10          | 245.32 | 297.51 |
| <i>Benlightfootia</i>        | 296.36           | 273.21 | 327.53 | 251.38          | 242.08 | 259.08 |
| <i>Calamites</i>             | 359.00           | 357.16 | 360.46 | 173.09          | 171.04 | 175.31 |
| <i>Calamostachys</i>         | 357.77           | 349.00 | 365.23 | 231.18          | 225.50 | 236.80 |
| <i>Cruciatheca</i>           | 300.25           | 285.72 | 318.53 | 279.83          | 253.83 | 292.78 |
| <i>Equisetinostachys</i>     | 286.16           | 274.79 | 308.03 | 252.17          | 243.88 | 258.73 |
| <i>Equisetites</i>           | 325.86           | 299.92 | 354.71 | 59.55           | 58.70  | 60.84  |

|                         |        |        |        |        |        |        |
|-------------------------|--------|--------|--------|--------|--------|--------|
| <i>Equisetocaulis</i>   | 229.06 | 204.62 | 245.73 | 202.34 | 145.52 | 227.34 |
| <i>Equisetum</i>        | 342.03 | 324.72 | 359.39 | extant |        |        |
| <i>Giridia</i>          | 296.87 | 284.59 | 318.41 | 273.34 | 250.20 | 286.63 |
| <i>Gondwanites</i>      | 320.88 | 299.09 | 359.93 | 296.00 | 254.36 | 317.70 |
| <i>Gondwanostachys</i>  | 298.97 | 272.53 | 343.53 | 266.91 | 245.26 | 289.62 |
| <i>Lelstotheca</i>      | 262.15 | 251.04 | 293.50 | 252.37 | 243.76 | 259.99 |
| <i>Neocalamites</i>     | 297.50 | 295.68 | 299.21 | 130.56 | 102.80 | 153.92 |
| <i>Notocalamites</i>    | 303.19 | 284.04 | 347.16 | 271.15 | 246.20 | 287.94 |
| <i>Paracalamites</i>    | 300.91 | 295.24 | 309.70 | 252.37 | 245.24 | 259.39 |
| <i>Paracalamitina</i>   | 287.57 | 260.21 | 336.05 | 253.87 | 239.68 | 268.68 |
| <i>Peltotheca</i>       | 311.41 | 297.03 | 351.53 | 283.35 | 249.70 | 298.97 |
| <i>Phyllotheca</i>      | 302.35 | 294.47 | 312.28 | 226.36 | 215.63 | 234.65 |
| <i>Raniganjia</i>       | 351.98 | 337.13 | 370.49 | 247.32 | 235.66 | 255.82 |
| <i>Sakoarota</i>        | 302.49 | 280.66 | 333.87 | 269.33 | 245.19 | 293.15 |
| <i>Schizoneura</i>      | 295.13 | 291.03 | 299.6  | 153.73 | 150.67 | 157.05 |
| <i>Spaciinodum</i>      | 245.29 | 241.07 | 253.36 | 239.52 | 229.87 | 244.91 |
| <i>Tchernovia</i>       | 300.61 | 251.15 | 349.32 | 274.60 | 245.14 | 316.36 |
| <i>Umbellaphyllites</i> | 292.75 | 287.88 | 300.16 | 248.67 | 245.92 | 251.57 |
| <b>Ophioglossales</b>   |        |        |        |        |        |        |
| <i>Botrychium</i>       | 78.10  | 57.87  | 110.55 | extant |        |        |
| <i>Ophioglossum</i>     | 24.34  | 16.41  | 36.39  | extant |        |        |
| <b>Psilotales</b>       |        |        |        |        |        |        |
| <i>Psilotum</i>         | 41.78  | 16.09  | 87.40  | extant |        |        |
| <i>Tmesipteris</i>      | 37.84  | 28.57  | 51.13  | extant |        |        |
| <b>Marattiales</b>      |        |        |        |        |        |        |
| <i>Acitheca</i>         | 322.31 | 311.79 | 332.95 | 252.93 | 246.29 | 259.87 |
| <i>Angiopteris</i>      | 231.95 | 208.94 | 247.17 | extant |        |        |
| <i>Asterotheca</i>      | 340.20 | 310.45 | 361.07 | 207.11 | 201.62 | 214.98 |
| <i>Boreopteris</i>      | 252.64 | 248.47 | 257.13 | 246.82 | 242.6  | 250.82 |
| <i>Caulopteris</i>      | 407.87 | 391.63 | 423.28 | 245.74 | 239.32 | 251.05 |
| <i>Danaea</i>           | 69.67  | 35.45  | 128.24 | extant |        |        |
| <i>Danaeites</i>        | 355.11 | 322.02 | 375.08 | 79.51  | 44.59  | 105.27 |
| <i>Danaeopsis</i>       | 260.31 | 254.33 | 265.51 | 86.58  | 84.30  | 88.55  |
| <i>Dizeugotheca</i>     | 290.48 | 274.75 | 307.23 | 250.77 | 244.16 | 256.76 |
| <i>Drepanozamites</i>   | 239.28 | 230.97 | 250.70 | 187.45 | 144.05 | 203.98 |
| <i>Eoangiopteris</i>    | 324.64 | 307.06 | 360.02 | 249.16 | 237.78 | 259.29 |
| <i>Gemellithec</i>      | 287.12 | 251.09 | 336.57 | 261.10 | 243.47 | 298.00 |
| <i>Goolandia</i>        | 115.95 | 93.60  | 165.89 | 87.91  | 58.77  | 104.90 |
| <i>Grandeuryella</i>    | 317.16 | 304.81 | 356.31 | 292.88 | 254.47 | 305.87 |
| <i>Herbstopteris</i>    | 240.50 | 235.07 | 246.94 | 234.13 | 218.90 | 240.89 |



|                        |        |        |        |        |        |        |
|------------------------|--------|--------|--------|--------|--------|--------|
| <i>Lobatopteris</i>    | 321.19 | 314.69 | 328.21 | 302.77 | 298.82 | 305.43 |
| <i>Marantoidea</i>     | 240.70 | 235.05 | 247.81 | 233.75 | 218.43 | 240.95 |
| <i>Marattia</i>        | 228.47 | 214.15 | 242.05 | extant |        |        |
| <i>Marattiopsis</i>    | 245.88 | 241.07 | 253.56 | 82.82  | 72.85  | 88.45  |
| <i>Megaphyton</i>      | 353.05 | 314.32 | 377.35 | 253.39 | 240.49 | 262.19 |
| <i>Mesozoisynangia</i> | 110.88 | 94.09  | 138.99 | 90.41  | 69.52  | 103.65 |
| <i>Myriotheca</i>      | 348.48 | 313.21 | 371.27 | 294.61 | 258.85 | 305.77 |
| <i>Ogmos</i>           | 242.83 | 235.03 | 252.32 | 236.29 | 221.17 | 244.98 |
| <i>Pecopteris</i>      | 378.55 | 368.32 | 385.03 | 41.54  | 32.49  | 51.52  |
| <i>Pectinangium</i>    | 302.34 | 274.38 | 335.26 | 269.14 | 245.00 | 292.47 |
| <i>Protoblechnum</i>   | 261.64 | 251.01 | 294.38 | 251.76 | 243.04 | 259.90 |
| <i>Psaronius</i>       | 393.40 | 363.64 | 419.69 | 248.94 | 241.91 | 254.60 |
| <i>Ptychocarpus</i>    | 326.72 | 302.56 | 364.38 | 248.67 | 236.41 | 259.35 |
| <i>Qasimia</i>         | 293.26 | 253.67 | 335.02 | 249.14 | 238.59 | 259.31 |
| <i>Radstockia</i>      | 320.63 | 300.39 | 360.43 | 296.26 | 254.99 | 317.41 |
| <i>Rajahia</i>         | 260.48 | 252.99 | 268.69 | 250.87 | 246.00 | 256.26 |
| <i>Rhinitepis</i>      | 229.41 | 202.90 | 247.22 | 205.41 | 151.62 | 234.75 |
| <i>Rienitsia</i>       | 233.46 | 213.42 | 246.76 | 201.73 | 169.62 | 225.36 |
| <i>Scolecopteris</i>   | 321.76 | 315.02 | 332.04 | 239.94 | 234.40 | 244.78 |
| <i>Sydneia</i>         | 321.49 | 307.09 | 359.96 | 296.79 | 254.39 | 311.34 |
| <i>Symopteris</i>      | 241.75 | 236.77 | 247.12 | 199.59 | 190.53 | 203.94 |
| <i>Taiyuanitheca</i>   | 261.77 | 251.06 | 294.50 | 251.83 | 243.12 | 259.72 |
| <i>Tietea</i>          | 297.71 | 256.59 | 341.00 | 257.45 | 241.64 | 292.34 |
| <i>Tranquillia</i>     | 228.03 | 203.22 | 245.61 | 202.70 | 148.73 | 227.51 |
| <i>Tuvichapteris</i>   | 293.22 | 251.83 | 335.95 | 246.70 | 236.17 | 253.72 |
| <i>Zhutheca</i>        | 261.15 | 251.09 | 290.75 | 251.91 | 243.16 | 259.88 |

**Paleozoic leptosporangiate ferns**

|                       |        |        |        |        |        |        |
|-----------------------|--------|--------|--------|--------|--------|--------|
| <i>Anachoropteris</i> | 348.10 | 322.39 | 369.16 | 251.80 | 245.24 | 259.02 |
| <i>Ankyropteris</i>   | 351.10 | 325.32 | 367.07 | 274.69 | 253.76 | 292.26 |
| <i>Apotropteris</i>   | 314.78 | 299.20 | 356.91 | 291.00 | 253.87 | 305.94 |
| <i>Botryopteris</i>   | 357.63 | 346.36 | 367.34 | 268.08 | 246.85 | 292.83 |
| <i>Catenopteris</i>   | 317.41 | 299.03 | 357.87 | 292.51 | 253.05 | 311.56 |
| <i>Doneggia</i>       | 314.81 | 299.23 | 356.16 | 289.62 | 252.51 | 305.87 |
| <i>Kaplanopteris</i>  | 314.77 | 299.11 | 354.98 | 289.25 | 251.67 | 305.92 |
| <i>Norwoodia</i>      | 324.94 | 311.55 | 361.26 | 300.54 | 256.93 | 314.56 |
| <i>Psalixochlaena</i> | 354.30 | 331.07 | 373.65 | 298.84 | 270.71 | 312.77 |
| <i>Rhabdoxylon</i>    | 322.99 | 312.58 | 344.14 | 298.27 | 273.70 | 311.73 |
| <i>Senftenbergia</i>  | 351.26 | 329.16 | 369.00 | 260.79 | 245.92 | 280.79 |
| <i>Sermaya</i>        | 319.97 | 306.24 | 350.05 | 292.30 | 257.92 | 305.52 |
| <i>Skaaripteris</i>   | 261.21 | 251.06 | 291.41 | 251.90 | 243.46 | 259.81 |

|                        |        |        |        |        |        |        |
|------------------------|--------|--------|--------|--------|--------|--------|
| <i>Tubicaulis</i>      | 320.77 | 312.56 | 332.04 | 251.57 | 244.21 | 259.64 |
| <b>Osmundales</b>      |        |        |        |        |        |        |
| <i>Anomopteris</i>     | 253.70 | 251.70 | 257.11 | 219.22 | 201.61 | 233.76 |
| <i>Ashicaulis</i>      | 249.93 | 241.04 | 264.82 | 70.99  | 41.36  | 98.30  |
| <i>Aurealcaulis</i>    | 69.80  | 57.91  | 85.64  | 30.80  | 23.01  | 38.03  |
| <i>Bathypteris</i>     | 261.15 | 251.14 | 292.83 | 251.61 | 243.2  | 259.54 |
| <i>Birmoltia</i>       | 236.91 | 228.37 | 243.99 | 224.84 | 209.36 | 234.20 |
| <i>Birtodites</i>      | 238.41 | 228.36 | 247.76 | 220.56 | 196.21 | 234.99 |
| <i>Cacumen</i>         | 161.54 | 136.96 | 213.62 | 88.47  | 58.16  | 111.07 |
| <i>Chasmatopteris</i>  | 261.43 | 251.01 | 289.26 | 252.32 | 243.94 | 259.86 |
| <i>Cladophlebis</i>    | 291.58 | 286.99 | 298.91 | 40.06  | 33.95  | 50.55  |
| <i>Donwelliacaulis</i> | 242.93 | 235.34 | 251.45 | 236.68 | 222.62 | 244.77 |
| <i>Elantodites</i>     | 236.02 | 231.34 | 240.10 | 227.2  | 220.63 | 231.33 |
| <i>Grammatopteris</i>  | 347.99 | 326.93 | 368.65 | 252.84 | 238.96 | 274.67 |
| <i>Guairia</i>         | 300.34 | 251.94 | 352.63 | 194.38 | 92.30  | 292.80 |
| <i>Iegosigopteris</i>  | 260.99 | 251.02 | 287.52 | 251.64 | 243.11 | 259.60 |
| <i>Itopsidema</i>      | 231.12 | 204.47 | 247.95 | 206.26 | 149.68 | 234.94 |
| <i>Leptopteris</i>     | 36.76  | 28.78  | 47.36  | extant |        |        |
| <i>Lunea</i>           | 192.32 | 148.49 | 241.07 | 149.44 | 86.73  | 199.26 |
| <i>Millerocaulis</i>   | 234.38 | 214.3  | 245.72 | 106.11 | 85.44  | 122.41 |
| <i>Nymbopteron</i>     | 241.88 | 235.31 | 251.24 | 223.61 | 206.49 | 234.9  |
| <i>Osmunda</i>         | 220.75 | 203.94 | 236.93 | extant |        |        |
| <i>Osmundacaulis</i>   | 249.66 | 241.03 | 262.25 | 70.54  | 36.56  | 96.96  |
| <i>Osmundastrum</i>    | 73.97  | 40.67  | 133.15 | extant |        |        |
| <i>Osmundopsis</i>     | 243.60 | 236.03 | 254.55 | 126.55 | 91.31  | 144.93 |
| <i>Paleosmunda</i>     | 260.97 | 251.07 | 290.48 | 251.40 | 242.90 | 259.54 |
| <i>Parsorophyllum</i>  | 248.19 | 241.22 | 258.28 | 222.55 | 204.50 | 234.72 |
| <i>Phyllopteroides</i> | 148.01 | 138.68 | 158.76 | 91.72  | 81.27  | 99.21  |
| <i>Rastropteris</i>    | 307.33 | 284.19 | 350.20 | 276.43 | 247.74 | 298.55 |
| <i>Rooitodites</i>     | 236.32 | 231.58 | 241.81 | 226.91 | 219.24 | 232.51 |
| <i>Shuichengella</i>   | 261.70 | 252.05 | 281.37 | 251.18 | 243.09 | 258.49 |
| <i>Sphenopteris</i>    | 326.42 | 321.78 | 331.68 | 33.65  | 28.29  | 39.43  |
| <i>Stormbergia</i>     | 240.57 | 235.07 | 247.08 | 225.42 | 213.05 | 233.95 |
| <i>Thamnopteris</i>    | 287.00 | 273.48 | 315.65 | 265.83 | 247.72 | 278.23 |
| <i>Todea</i>           | 192.13 | 172.31 | 235.79 | extant |        |        |
| <i>Todites</i>         | 257.66 | 252.88 | 260.78 | 119.43 | 99.77  | 142.16 |
| <i>Zalesskya</i>       | 262.02 | 251.09 | 294.81 | 251.94 | 242.93 | 259.65 |
| <i>Zhongmingella</i>   | 257.58 | 252.21 | 275.22 | 249.82 | 242.32 | 254.19 |
| <b>Hymenophyllales</b> |        |        |        |        |        |        |
| <i>Eogonocormus</i>    | 146.99 | 105.53 | 195.28 | 101.73 | 68.98  | 144.47 |

|                         |        |        |        |        |        |        |
|-------------------------|--------|--------|--------|--------|--------|--------|
| <i>Hopetedia</i>        | 238.42 | 228.23 | 248.23 | 221.20 | 198.08 | 234.95 |
| <i>Hymenophyllites</i>  | 362.55 | 345.11 | 377.92 | 97.41  | 61.54  | 134.10 |
| <i>Hymenophyllum</i>    | 94.55  | 85.95  | 106.37 | extant |        |        |
| <i>Trichomanes</i>      | 86.13  | 66.77  | 116.20 | extant |        |        |
| <b>Gleicheniales</b>    |        |        |        |        |        |        |
| <i>Aninopteris</i>      | 204.05 | 192.26 | 218.82 | 176.19 | 156.41 | 192.15 |
| <i>Antarctipteris</i>   | 245.78 | 241.05 | 254.05 | 239.77 | 230.70 | 244.91 |
| <i>Boodlepteris</i>     | 101.36 | 89.33  | 128.17 | 76.31  | 57.19  | 85.73  |
| <i>Camptopteris</i>     | 247.52 | 235.22 | 256.42 | 195.14 | 185.86 | 201.71 |
| <i>Chansitheca</i>      | 301.81 | 280.55 | 331.85 | 248.06 | 238.47 | 253.93 |
| <i>Clathropteris</i>    | 248.34 | 240.03 | 255.08 | 149.32 | 140.42 | 161.02 |
| <i>Delosorus</i>        | 139.37 | 113.30 | 194.89 | 104.41 | 67.64  | 128.76 |
| <i>Dicranopteris</i>    | 87.57  | 81.37  | 97.97  | extant |        |        |
| <i>Dictyophyllum</i>    | 249.47 | 244.37 | 253.75 | 145.58 | 142.89 | 149.15 |
| <i>Gleichenia</i>       | 178.50 | 174.42 | 182.67 | extant |        |        |
| <i>Gleicheniopsis</i>   | 133.83 | 100.89 | 177.89 | 48.29  | 25.13  | 63.97  |
| <i>Gleichenipteris</i>  | 243.15 | 235.54 | 252.17 | 237.00 | 223.75 | 244.98 |
| <i>Gleichenites</i>     | 245.21 | 242.50 | 247.53 | 49.82  | 34.90  | 58.51  |
| <i>Goepfertella</i>     | 227.44 | 203.85 | 245.00 | 149.84 | 120.73 | 167.02 |
| <i>Hausmannia</i>       | 241.30 | 238.51 | 245.11 | 60.16  | 58.98  | 61.49  |
| <i>Kenderlykia</i>      | 209.05 | 179.17 | 244.91 | 165.28 | 95.06  | 203.87 |
| <i>Konijnenburgia</i>   | 101.53 | 94.62  | 111.44 | 91.80  | 82.10  | 97.12  |
| <i>Lacopteris</i>       | 243.31 | 226.00 | 255.84 | 50.40  | 33.03  | 59.52  |
| <i>Matonia</i>          | 207.65 | 179.88 | 242.22 | extant |        |        |
| <i>Matonidium</i>       | 183.66 | 171.83 | 207.34 | 76.78  | 60.48  | 85.24  |
| <i>Microphylopteris</i> | 258.69 | 247.22 | 289.83 | 85.43  | 58.55  | 106.02 |
| <i>Nathorstia</i>       | 191.14 | 150.08 | 240.50 | 64.48  | 31.32  | 91.29  |
| <i>Oligocarpia</i>      | 352.79 | 329.76 | 369.55 | 210.01 | 196.69 | 227.39 |
| <i>Phlebopteris</i>     | 239.86 | 235.58 | 244.26 | 102.71 | 92.64  | 115.24 |
| <i>Piazopteris</i>      | 207.38 | 179.55 | 242.18 | 97.80  | 61.92  | 133.49 |
| <i>Selenocarpus</i>     | 211.78 | 191.51 | 241.76 | 154.49 | 116.56 | 175.35 |
| <i>Soloropteris</i>     | 245.90 | 241.08 | 254.34 | 239.96 | 231.13 | 244.99 |
| <i>Sticherus</i>        | 87.17  | 66.10  | 117.16 | extant |        |        |
| <i>Szea</i>             | 295.05 | 271.18 | 340.55 | 262.34 | 243.81 | 283.46 |
| <i>Tasmanopteris</i>    | 194.31 | 151.39 | 241.77 | 151.19 | 86.89  | 198.73 |
| <i>Thaumatopteris</i>   | 244.82 | 236.24 | 255.95 | 178.59 | 159.46 | 195.16 |
| <i>Tomaniopteris</i>    | 242.34 | 235.16 | 251.02 | 236.05 | 222.22 | 244.95 |
| <i>Weichselia</i>       | 187.45 | 175.05 | 200.19 | 79.12  | 69.67  | 84.40  |
| <i>Wingatea</i>         | 231.16 | 209.17 | 245.87 | 202.8  | 170.56 | 220.49 |
| <b>Schizaeales</b>      |        |        |        |        |        |        |

|                           |        |        |        |        |        |        |
|---------------------------|--------|--------|--------|--------|--------|--------|
| <i>Anemia</i>             | 140.01 | 131.13 | 146.54 | extant |        |        |
| <i>Baieropsis</i>         | 141.90 | 111.66 | 170.41 | 76.76  | 52.93  | 104.44 |
| <i>Cynepteris</i>         | 249.18 | 237.73 | 258.57 | 202.79 | 191.24 | 215.84 |
| <i>Eleganopteris</i>      | 252.98 | 247.78 | 258.91 | 245.17 | 238.68 | 250.74 |
| <i>Klukia</i>             | 189.73 | 178.76 | 201.77 | 108.71 | 99.32  | 115.14 |
| <i>Klukiopsis</i>         | 189.65 | 161.88 | 239.50 | 143.11 | 83.54  | 175.66 |
| <i>Lygodium</i>           | 111.02 | 81.89  | 144.86 | extant |        |        |
| <i>Mohriopsis</i>         | 166.87 | 146.9  | 202.18 | 138.88 | 100.00 | 158.86 |
| <i>Norimbergia</i>        | 229.92 | 201.67 | 245.48 | 205.88 | 149.7  | 234.21 |
| <i>Paralygodium</i>       | 51.80  | 34.51  | 77.00  | 32.56  | 22.90  | 46.53  |
| <i>Pekinopteris</i>       | 228.94 | 202.24 | 246.63 | 203.43 | 148.02 | 234.20 |
| <i>Pelletixia</i>         | 144.79 | 136.16 | 159.41 | 108.20 | 89.51  | 124.08 |
| <i>Ruffordia</i>          | 161.49 | 140.68 | 201.24 | 30.80  | 8.78   | 47.79  |
| <i>Schizaea</i>           | 64.01  | 56.05  | 75.90  | extant |        |        |
| <i>Schizaeangium</i>      | 151.53 | 104.21 | 210.47 | 115.43 | 70.12  | 158.99 |
| <i>Schizaeopsis</i>       | 140.01 | 114.60 | 180.89 | 71.35  | 39.46  | 98.86  |
| <i>Schizaeopteris</i>     | 95.03  | 65.69  | 139.40 | 73.00  | 42.85  | 99.24  |
| <i>Stachypteris</i>       | 200.59 | 177.29 | 238.65 | 152.28 | 117.96 | 171.69 |
| <b>Salviniales</b>        |        |        |        |        |        |        |
| <i>Azinia</i>             | 95.39  | 66.22  | 137.16 | 74.01  | 45.31  | 99.52  |
| <i>Azolla</i>             | 126.74 | 99.47  | 145.32 | extant |        |        |
| <i>Hydropteris</i>        | 71.04  | 68.59  | 73.55  | 65.60  | 62.82  | 67.84  |
| <i>Marsilea</i>           | 194.75 | 178.21 | 210.06 | extant |        |        |
| <i>Marsileaceaphyllum</i> | 112.47 | 108.98 | 116.65 | 99.15  | 95.04  | 102.81 |
| <i>Mendozaphyllum</i>     | 87.15  | 65.53  | 130.59 | 65.49  | 34.65  | 83.49  |
| <i>Nammouria</i>          | 111.84 | 93.52  | 160.61 | 86.06  | 58.36  | 99.47  |
| <i>Parazolla</i>          | 80.41  | 65.57  | 119.45 | 60.04  | 31.46  | 70.51  |
| <i>Pilularia</i>          | 89.70  | 66.22  | 123.21 | extant |        |        |
| <i>Regnellidium</i>       | 102.2  | 83.83  | 142.19 | extant |        |        |
| <i>Regnellites</i>        | 169.00 | 140.18 | 233.49 | 131.84 | 81.24  | 159.96 |
| <i>Rodeites</i>           | 78.11  | 61.05  | 116.81 | 56.59  | 29.08  | 68.91  |
| <i>Salvinia</i>           | 83.34  | 69.34  | 98.97  | extant |        |        |
| <b>Cyatheales</b>         |        |        |        |        |        |        |
| <i>Acanthopteris</i>      | 164.27 | 156.67 | 177.18 | 105.93 | 87.17  | 129.92 |
| <i>Alienopteris</i>       | 137.65 | 112.86 | 194.44 | 101.83 | 65.19  | 124.72 |
| <i>Alsophila</i>          | 16.13  | 2.64   | 53.15  | extant |        |        |
| <i>Alsophilites</i>       | 192.54 | 149.33 | 240.23 | 121.24 | 84.69  | 139.78 |
| <i>Alsophilocaulis</i>    | 40.00  | 23.08  | 75.20  | 23.39  | 2.37   | 33.32  |
| <i>Cibotiocaulis</i>      | 124.05 | 65.69  | 190.28 | 94.08  | 54.82  | 143.67 |
| <i>Cibotium</i>           | 101.11 | 66.95  | 143.19 | extant |        |        |

|                          |        |        |        |        |        |        |
|--------------------------|--------|--------|--------|--------|--------|--------|
| <i>Conantiopteris</i>    | 137.12 | 112.1  | 195.24 | 101.36 | 63.33  | 124.53 |
| <i>Coniopteris</i>       | 329.43 | 303.57 | 358.08 | 37.15  | 28.36  | 46.31  |
| <i>Culcitites</i>        | 172.75 | 146.01 | 235.63 | 134.36 | 82.61  | 160.57 |
| <i>Cyathea</i>           | 222.57 | 203.47 | 239.62 | extant |        |        |
| <i>Cyathocarpus</i>      | 314.82 | 298.99 | 355.06 | 290.13 | 252.63 | 306.7  |
| <i>Cyathocaulis</i>      | 171.81 | 145.92 | 210.31 | 64.03  | 30.42  | 89.69  |
| <i>Cyathodendron</i>     | 55.26  | 53.27  | 56.87  | 33.52  | 32.38  | 34.28  |
| <i>Dendropteridium</i>   | 27.26  | 6.09   | 53.60  | 5.44   | 0.00   | 17.17  |
| <i>Dicksonia</i>         | 203.66 | 192.1  | 215.19 | extant |        |        |
| <i>Eboracia</i>          | 206.92 | 197.96 | 221.27 | 116.64 | 90.29  | 142.2  |
| <i>Eocyathea</i>         | 136.60 | 112.27 | 190.14 | 102.27 | 66.99  | 124.82 |
| <i>Gonatosorus</i>       | 214.70 | 193.5  | 244.62 | 102.64 | 67.59  | 142.75 |
| <i>Haydenia</i>          | 177.66 | 156.13 | 235.69 | 139.52 | 87.14  | 160.94 |
| <i>Kwazulupteris</i>     | 115.76 | 91.69  | 148.52 | 87.62  | 63.30  | 107.81 |
| <i>Kylikipteris</i>      | 207.44 | 181.45 | 242.14 | 138.71 | 98.49  | 157.19 |
| <i>Lophosoria</i>        | 148.45 | 112.7  | 222.62 | extant |        |        |
| <i>Loxsomopteris</i>     | 137.07 | 112.35 | 192.68 | 102.59 | 64.99  | 124.91 |
| <i>Natalipteris</i>      | 115.72 | 93.81  | 149.88 | 87.60  | 61.18  | 106.55 |
| <i>Nishidacaulis</i>     | 142.65 | 101.55 | 203.43 | 107.72 | 67.69  | 143.9  |
| <i>Oguracaulis</i>       | 152.13 | 102.68 | 214.99 | 116.22 | 71.30  | 160.39 |
| <i>Onychiopsis</i>       | 182.03 | 168.74 | 203.01 | 83.03  | 80.02  | 85.25  |
| <i>Paracyathocaulis</i>  | 112.87 | 65.78  | 168.63 | 85.44  | 50.00  | 124.32 |
| <i>Protopteris</i>       | 147.38 | 127.13 | 180.55 | 81.23  | 59.89  | 93.28  |
| <i>Rickwoodopteris</i>   | 88.89  | 70.61  | 127.25 | 68.02  | 39.70  | 83.42  |
| <i>Sergioa</i>           | 138.32 | 112.31 | 187.66 | 74.22  | 46.73  | 88.66  |
| <i>Solenostelopteris</i> | 154.11 | 130.21 | 214.40 | 117.06 | 71.92  | 139.79 |
| <i>Thyrsopteris</i>      | 340.63 | 304.41 | 372.07 | extant |        |        |
| <b>Polypodiales</b>      |        |        |        |        |        |        |
| <i>Acrostichum</i>       | 71.42  | 67.84  | 75.78  | extant |        |        |
| <i>Adiantopteris</i>     | 239.34 | 228.11 | 253.20 | 94.54  | 63.54  | 125.83 |
| <i>Adiantum</i>          | 126.72 | 114.15 | 139.20 | extant |        |        |
| <i>Allantodiopsis</i>    | 89.92  | 79.48  | 100.83 | 33.22  | 30.87  | 35.00  |
| <i>Anogramma</i>         | 6.10   | 2.65   | 15.90  | extant |        |        |
| <i>Antrophyum</i>        | 25.69  | 19.82  | 35.64  | extant |        |        |
| <i>Arthropteris</i>      | 10.27  | 1.83   | 42.68  | extant |        |        |
| <i>Aspidistes</i>        | 185.45 | 173.02 | 205.28 | 127.26 | 113.45 | 139.18 |
| <i>Asplenium</i>         | 236.24 | 228.85 | 242.56 | extant |        |        |
| <i>Astralopteris</i>     | 132.17 | 100.12 | 174.07 | 87.06  | 66.15  | 97.26  |
| <i>Athyrium</i>          | 155.79 | 127.85 | 199.84 | extant |        |        |
| <i>Blechnum</i>          | 151.01 | 141.00 | 163.04 | extant |        |        |

|                        |        |        |        |        |       |        |
|------------------------|--------|--------|--------|--------|-------|--------|
| <i>Ceratopteris</i>    | 58.71  | 34.59  | 94.73  | extant |       |        |
| <i>Coniogramme</i>     | 36.10  | 5.56   | 83.58  | extant |       |        |
| <i>Cretacifilix</i>    | 138.47 | 99.82  | 197.11 | 104.69 | 65.11 | 142.01 |
| <i>Cryptogrammites</i> | 42.12  | 28.47  | 74.43  | 26.28  | 6.44  | 33.82  |
| <i>Ctenitis</i>        | 7.68   | 2.07   | 23.17  | extant |       |        |
| <i>Cuyenopteris</i>    | 39.08  | 23.02  | 73.30  | 23.13  | 2.40  | 32.97  |
| <i>Davallia</i>        | 56.83  | 37.12  | 72.57  | extant |       |        |
| <i>Dennastra</i>       | 77.66  | 61.72  | 118.94 | 54.53  | 27.64 | 66.38  |
| <i>Dennstaedtia</i>    | 175.48 | 161.69 | 190.77 | extant |       |        |
| <i>Dennstedtiopsis</i> | 50.71  | 40.74  | 70.04  | 30.38  | 23.03 | 36.42  |
| <i>Deparia</i>         | 19.37  | 5.36   | 47.31  | extant |       |        |
| <i>Diplazium</i>       | 71.37  | 34.81  | 134.93 | extant |       |        |
| <i>Drynaria</i>        | 13.73  | 6.26   | 25.78  | extant |       |        |
| <i>Dryopteris</i>      | 173.58 | 164.55 | 180.63 | extant |       |        |
| <i>Elaphoglossum</i>   | 40.49  | 15.51  | 88.12  | extant |       |        |
| <i>Eogymnocarpium</i>  | 139.66 | 99.85  | 199.93 | 104.38 | 63.47 | 145.14 |
| <i>Grammitis</i>       | 24.20  | 15.32  | 39.13  | extant |       |        |
| <i>Hemionitis</i>      | 81.67  | 57.77  | 123.27 | extant |       |        |
| <i>Histiopteris</i>    | 36.40  | 28.79  | 46.81  | extant |       |        |
| <i>Hypolepis</i>       | 23.14  | 16.15  | 33.99  | extant |       |        |
| <i>Krameropteris</i>   | 121.81 | 98.03  | 177.85 | 91.22  | 60.57 | 111.25 |
| <i>Lastreopsis</i>     | 16.47  | 2.64   | 54.64  | extant |       |        |
| <i>Lepisorus</i>       | 38.04  | 28.70  | 52.09  | extant |       |        |
| <i>Leptolepia</i>      | 8.11   | 0.06   | 36.88  | extant |       |        |
| <i>Lindsaea</i>        | 40.64  | 34.07  | 50.81  | extant |       |        |
| <i>Makotopteris</i>    | 59.12  | 40.52  | 101.36 | 35.54  | 18.91 | 48.40  |
| <i>Microlepiopsis</i>  | 86.43  | 71.78  | 109.24 | 68.57  | 50.79 | 82.72  |
| <i>Microsorium</i>     | 47.09  | 37.70  | 57.46  | extant |       |        |
| <i>Midlandia</i>       | 88.43  | 70.68  | 128.09 | 67.59  | 38.66 | 83.38  |
| <i>Nephrolepis</i>     | 10.64  | 5.39   | 17.68  | extant |       |        |
| <i>Oleandra</i>        | 134.53 | 119.57 | 152.44 | extant |       |        |
| <i>Onoclea</i>         | 112.70 | 94.05  | 141.68 | extant |       |        |
| <i>Paesia</i>          | 40.39  | 34.17  | 50.31  | extant |       |        |
| <i>Pellaea</i>         | 10.04  | 1.81   | 40.94  | extant |       |        |
| <i>Pleopeltis</i>      | 41.29  | 16.11  | 91.51  | extant |       |        |
| <i>Polypodium</i>      | 52.24  | 34.18  | 72.69  | extant |       |        |
| <i>Polystichum</i>     | 79.86  | 65.63  | 108.17 | extant |       |        |
| <i>Protodrynaria</i>   | 43.78  | 28.56  | 78.04  | 27.19  | 8.37  | 37.15  |
| <i>Pteridium</i>       | 37.05  | 33.98  | 40.91  | extant |       |        |
| <i>Pteris</i>          | 99.83  | 95.61  | 104.76 | extant |       |        |

|                               |        |        |        |        |        |        |
|-------------------------------|--------|--------|--------|--------|--------|--------|
| <i>Pyrrosia</i>               | 5.60   | 3.64   | 9.20   | extant |        |        |
| <i>Rumohra</i>                | 49.74  | 34.46  | 66.21  | extant |        |        |
| <i>Saccoloma</i>              | 102.9  | 94.76  | 114.88 | extant |        |        |
| <i>Salpichlaena</i>           | 74.39  | 68.98  | 84.41  | extant |        |        |
| <i>Stramineopteris</i>        | 153.12 | 130.22 | 209.92 | 116.95 | 71.89  | 139.9  |
| <i>Tecaropteris</i>           | 55.63  | 23.09  | 97.41  | 35.14  | 9.63   | 64.25  |
| <i>Tectaria</i>               | 135.30 | 123.91 | 151.61 | extant |        |        |
| <i>Thelypteridaceophyllum</i> | 7.82   | 1.83   | 31.06  | 1.71   | 0.08   | 3.17   |
| <i>Thelypteris</i>            | 76.00  | 66.42  | 85.21  | extant |        |        |
| <i>Trawetsia</i>              | 55.73  | 37.34  | 92.61  | 34.09  | 16.55  | 48.46  |
| <i>Wessiea</i>                | 97.48  | 70.75  | 149.79 | 5.63   | 0.01   | 14.40  |
| <i>Woodwardia</i>             | 121.92 | 97.58  | 145.22 | extant |        |        |
| <b>Incertae cedis</b>         |        |        |        |        |        |        |
| <i>Acrostichopteris</i>       | 228.12 | 209.77 | 242.32 | 101.06 | 86.50  | 114.80 |
| <i>Adiantitophyllum</i>       | 124.06 | 100.12 | 176.83 | 92.15  | 60.37  | 111.88 |
| <i>Asplenites</i>             | 239.70 | 229.49 | 251.35 | 61.83  | 29.46  | 82.22  |
| <i>Boweria</i>                | 355.30 | 329.70 | 376.35 | 311.2  | 271.78 | 349.97 |
| <i>Crenulopteris</i>          | 318.51 | 314.97 | 323.44 | 302.42 | 297.86 | 305.14 |
| <i>Daeniopteris</i>           | 254.78 | 245.32 | 274.99 | 203.07 | 163.95 | 233.80 |
| <i>Dictyonymba</i>            | 242.78 | 235.11 | 251.93 | 235.73 | 220.34 | 244.91 |
| <i>Diplazites</i>             | 316.65 | 304.08 | 354.62 | 292.00 | 252.83 | 305.95 |
| <i>Discopteris</i>            | 320.49 | 300.39 | 360.80 | 296.08 | 254.98 | 317.60 |
| <i>Displinites</i>            | 237.19 | 229.57 | 244.98 | 224.82 | 209.63 | 234.00 |
| <i>Dryopterites</i>           | 147.38 | 121.65 | 177.66 | 97.73  | 68.36  | 117.11 |
| <i>Fremouwa</i>               | 245.82 | 241.07 | 253.97 | 240.12 | 231.80 | 244.89 |
| <i>Gordonopteris</i>          | 247.85 | 242.24 | 255.60 | 234.45 | 223.93 | 240.96 |
| <i>Gouldiopteris</i>          | 242.82 | 235.22 | 251.83 | 236.40 | 221.21 | 244.98 |
| <i>Holmesopteris</i>          | 317.07 | 304.36 | 340.51 | 299.23 | 273.46 | 312.57 |
| <i>Katasiopteris</i>          | 253.92 | 251.34 | 258.17 | 245.67 | 239.89 | 250.73 |
| <i>Korallipteris</i>          | 100.63 | 86.41  | 144.57 | 78.04  | 50.75  | 88.62  |
| <i>Leconama</i>               | 242.81 | 235.02 | 251.65 | 236.63 | 222.96 | 244.87 |
| <i>Micronymbopterus</i>       | 242.44 | 235.13 | 251.26 | 235.99 | 220.91 | 244.93 |
| <i>Molteniella</i>            | 238.09 | 228.22 | 247.67 | 220.67 | 195.86 | 234.77 |
| <i>Neuropteridium</i>         | 244.16 | 242.33 | 245.50 | 234.96 | 234.46 | 235.42 |
| <i>Nunatakia</i>              | 124.27 | 99.96  | 177.83 | 92.33  | 60.22  | 111.95 |
| <i>Nymbofelicia</i>           | 242.54 | 235.06 | 251.27 | 236.25 | 221.52 | 245.00 |
| <i>Nymboidiantum</i>          | 239.78 | 235.60 | 244.62 | 226.89 | 218.88 | 232.09 |
| <i>Nymbophlebis</i>           | 243.07 | 235.06 | 252.54 | 236.91 | 222.34 | 244.95 |
| <i>Nymborhipteris</i>         | 243.10 | 235.14 | 252.04 | 236.40 | 221.32 | 244.83 |
| <i>Paratryzia</i>             | 297.04 | 273.34 | 329.02 | 267.49 | 245.56 | 287.35 |

|                       |        |        |        |        |        |        |
|-----------------------|--------|--------|--------|--------|--------|--------|
| <i>Pterisorus</i>     | 154.11 | 130.05 | 216.68 | 117.31 | 72.19  | 139.79 |
| <i>Ptilotonymba</i>   | 242.97 | 235.05 | 251.58 | 236.50 | 222.40 | 244.96 |
| <i>Raphaelia</i>      | 225.15 | 210.45 | 237.50 | 127.38 | 101.08 | 144.06 |
| <i>Renaultia</i>      | 336.03 | 322.20 | 360.50 | 305.38 | 298.30 | 309.38 |
| <i>Schleporia</i>     | 246.14 | 241.17 | 255.00 | 240.07 | 231.23 | 244.92 |
| <i>Schopfiopteris</i> | 245.83 | 241.22 | 254.44 | 239.79 | 231.03 | 244.96 |
| <i>Scolopendrites</i> | 253.71 | 251.71 | 257.12 | 238.26 | 233.28 | 243.61 |
| <i>Selleyopteris</i>  | 172.97 | 151.03 | 235.61 | 134.13 | 83.26  | 155.67 |
| <i>Sendersonia</i>    | 262.39 | 251.14 | 297.38 | 252.13 | 243.40 | 259.96 |
| <i>Speirsopteris</i>  | 74.64  | 56.86  | 117.84 | 48.27  | 25.00  | 60.17  |
| <i>Tempskya</i>       | 143.78 | 136.94 | 149.54 | 69.65  | 61.94  | 83.69  |
| <i>Trizygia</i>       | 294.32 | 272.95 | 311.63 | 249.17 | 241.68 | 255.64 |
| <i>Yavanna</i>        | 136.98 | 112.11 | 192.36 | 101.83 | 65.81  | 124.91 |
| <i>Yulebacaulis</i>   | 142.60 | 100.23 | 205.12 | 107.04 | 65.22  | 143.72 |

## Supplementary Table 2. Molecular age estimates.

| Clade                   | stem age (Ma) | 95% HPD       | crown age (Ma) | 95% HPD       |
|-------------------------|---------------|---------------|----------------|---------------|
| MONILOPHYTES            | n.a.          | n.a.          | 421.3          | 379.16-465.97 |
| EQUISETIDAE             | 421.3         | 379.16-465.97 | 80.1           | 50.87-113.95  |
| EQUISETALES             | 421.3         | 379.16-465.97 | 80.1           | 50.87-113.95  |
| <b>Equisetaceae</b>     | 421.3         | 379.16-465.97 | 80.1           | 50.87-113.95  |
| <i>Equisetum</i>        | 421.3         | 379.16-465.97 | 80.1           | 50.87-113.95  |
| OPHIOGLOSSIDAE          | 358.29        | 318.00-401.48 | 244.2          | 186.64-306.29 |
| OPHIOGLOSSALES          | 244.2         | 186.64-306.29 | 148.94         | 108.17-187.78 |
| <b>Ophioglossaceae</b>  | 244.2         | 186.64-306.29 | 148.94         | 108.17-187.78 |
| <i>Botrychium</i>       | 29.63         | 14.51-48.37   | 16.1           | 6.00-28.52    |
| <i>Botrypus</i>         | 54.61         | 27.25-86.01   | 22.44          | 14.89-45.08   |
| <i>Cheiroglossa</i>     | not included  |               |                |               |
| <i>Helminthostachys</i> | 119.79        | 84.78-159.10  | n.a.           | n.a.          |
| <i>Japanobotrychium</i> | not included  |               |                |               |
| <i>Mankyua</i>          | not included  |               |                |               |
| <i>Ophioderma</i>       | 69.8          | 41.38-101.05  | n.a.           | n.a.          |
| <i>Ophioglossum</i>     | 69.8          | 41.38-101.05  | n.a.           | n.a.          |
| <i>Rhizoglossum</i>     | not included  |               |                |               |
| PSILOTALES              | 244.2         | 186.64-306.29 | 55.82          | 123.40-91.76  |
| <b>Psilotaceae</b>      | 244.2         | 186.64-306.29 | 55.82          | 123.40-91.76  |
| <i>Psilotum</i>         | 55.82         | 23.40-91.76   | n.a.           | n.a.          |



|                         |                            |               |      |                      |
|-------------------------|----------------------------|---------------|------|----------------------|
| <i>Tmesipteris</i>      | 55.82                      | 23.40-91.76   | n.a. | n.a.                 |
| MARATTIIDAE             | 358.29                     | 318.00-401.48 |      | 202.71 185.29-224.20 |
| MARATTIALES             | 358.29                     | 318.00-401.48 |      | 202.71 185.29-224.20 |
| <b>Marattiaceae</b>     | 358.29                     | 318.00-401.48 |      | 202.71 185.29-224.20 |
| <i>Angiopteris</i>      | 182.69                     | 172.00-198.04 |      | 1.78 0.06-4.69       |
| <i>Christensenia</i>    | 202.71                     | 185.29-224.20 | n.a. | n.a.                 |
| <i>Danaea</i>           | 188.8                      | 177.71-203.20 |      | 30.43 17.29-45.96    |
| <i>Eupodium</i>         | 181.39                     | 176.19-191.92 | n.a. | n.a.                 |
| <i>Marattia</i>         | 182.69                     | 172.00-198.04 | n.a. | n.a.                 |
| <i>Ptisana</i>          | 181.39                     | 176.00-191.92 |      | 17.91 8.06-29.84     |
| POLYPODIIDAE            | 414.34                     | 374.15-456.27 |      | 377.19 339.23-414.21 |
| OSMUNDALES              | 377.19                     | 339.23-414.21 |      | 241.26 217.19-270.38 |
| <b>Osmundaceae</b>      | 377.19                     | 339.23-414.21 |      | 241.26 217.19-270.38 |
| <i>Claytosmunda</i>     | embedded in <i>Osmunda</i> |               |      |                      |
| <i>Leptopteris</i>      | 155.27                     | 136.00-191.72 |      | 12.1 2.44-26.16      |
| <i>Osmunda</i>          | 223.92                     | 208.04-243.87 |      | 206.75 201.60-217.65 |
| <i>Osmundastrum</i>     | 241.26                     | 217.19-270.38 |      | 12 1.12-30.70        |
| <i>Plenasium</i>        | embedded in <i>Osmunda</i> |               |      |                      |
| <i>Todea</i>            | 155.27                     | 136.00-191.72 | n.a. | n.a.                 |
| HYMENOPHYLLALES         | 315.27                     | 282.11-348.57 |      | 216.09 175.76-255.40 |
| <b>Hymenophyllaceae</b> | 315.27                     | 282.11-348.57 |      | 216.09 175.76-255.40 |
| TRICHOMANOIDEAE         | 216.09                     | 175.76-255.40 |      | 175.15 142.88-206.42 |
| <i>Abrodictyum</i>      | 97.82                      | 58.14-139.30  |      | 56.71 27.70-93.68    |
| <i>Callistopteris</i>   | 128.45                     | 84.72-169.36  | n.a. | n.a.                 |
| <i>Cephalomanes</i>     | 97.82                      | 58.14-139.30  | n.a. | n.a.                 |
| <i>Crepidomanes</i>     | 130.04                     | 103.42-157.17 |      | 88.5 63.90-114.91    |
| <i>Didymoglossum</i>    | 140.78                     | 114.95-167.68 |      | 103.56 79.33-127.81  |
| <i>Polyphlebium</i>     | 151.65                     | 123.66-178.90 |      | 62.46 30.86-98.15    |
| <i>Trichomanes</i>      | 152.15                     | 118.79-185.83 |      | 99.47 73.34-128.01   |
| <i>Vandenboschia</i>    | 130.04                     | 103.42-157.17 |      | 27.11 5.77-55.76     |
| HYMENOPHYLLOIDEAE       | 216.09                     | 175.76-255.40 |      | 47.37 35.92-60.01    |
| <i>Hymenophyllum</i>    | 216.09                     | 175.76-255.40 |      | 47.37 35.92-60.01    |
| GLEICHENIALES           | 280.44                     | 261.59-320.01 |      | 134.09 110.23-161.65 |
| <b>Gleicheniaceae</b>   | 280.44                     | 261.59-320.01 |      | 134.09 110.23-161.65 |
| <i>Dicranopteris</i>    | 32.42                      | 14.24-54.56   | n.a. | n.a.                 |
| <i>Diplopterygium</i>   | 91.74                      | 55.83-127.57  |      | 28.83 12.00-50.02    |
| <i>Gleichenella</i>     | 32.42                      | 14.24-54.56   | n.a. | n.a.                 |
| <i>Gleichenia</i>       | 95.45                      | 89.30-107.47  | n.a. | n.a.                 |
| <i>Sticherus</i>        | 110.35                     | 95.11-129.08  |      | 76.99 37.80-110.62   |
| <i>Stromatopteris</i>   | 95.45                      | 89.30-107.47  | n.a. | n.a.                 |

|                          |        |               |      |        |               |
|--------------------------|--------|---------------|------|--------|---------------|
| <b>Dipteridaceae</b>     | 242.48 | 235.00-256.62 |      | 50.38  | 22.57-87.25   |
| <i>Cheiropleuria</i>     | 50.38  | 22.57-87.25   | n.a. |        | n.a.          |
| <i>Dipteris</i>          | 50.38  | 22.57-87.25   | n.a. |        | n.a.          |
| <b>Matoniaceae</b>       | 242.48 | 235.00-256.62 |      | 96.6   | 49.83-149.11  |
| <i>Matonia</i>           | 96.6   | 49.83-149.11  | n.a. |        | n.a.          |
| <i>Phanerosorus</i>      | 96.6   | 49.83-149.11  | n.a. |        | n.a.          |
| SCHIZAEALES              | 322.79 | 290.55-354.72 |      | 250.76 | 213.60-287.39 |
| <b>Lygodiaceae</b>       | 250.76 | 213.60-287.39 |      | 45.58  | 23.31-72.61   |
| <i>Lygodium</i>          | 250.76 | 213.60-287.39 |      | 45.58  | 23.31-72.61   |
| <b>Schizaeaceae</b>      | 190.36 | 161.39-222.54 |      | 91.32  | 51.37-133.42  |
| <i>Actinostachys</i>     | 91.32  | 51.37-133.42  | n.a. |        | n.a.          |
| <i>Schizaea</i>          | 91.32  | 51.37-133.42  |      | 24.01  | 15.59-48.87   |
| <b>Anemiaceae</b>        | 190.36 | 161.39-222.54 |      | 145.26 | 136.00-162.15 |
| <i>Anemia</i>            | 190.36 | 161.39-222.54 |      | 145.26 | 136.00-162.15 |
| SALVINIALES              | 290.3  | 260.52-320.25 |      | 195.55 | 155.00-235.65 |
| <b>Marsileaceae</b>      | 195.55 | 155.00-235.65 |      | 109.29 | 99.60-125.22  |
| <i>Marsilea</i>          | 109.29 | 99.60-125.22  |      | 31.5   | 18.17-46.60   |
| <i>Pilularia</i>         | 90.26  | 83.50-101.25  |      | 9.44   | 2.39-20.26    |
| <i>Regnellidium</i>      | 90.26  | 83.50-101.25  | n.a. |        | n.a.          |
| <b>Salviniaceae</b>      | 195.55 | 155.00-235.65 |      | 105.13 | 83.50-130.34  |
| <i>Azolla</i>            | 105.13 | 83.50-130.34  |      | 52.39  | 34.91-70.97   |
| <i>Salvinia</i>          | 105.13 | 83.50-130.34  |      | 49.73  | 29.85-71.40   |
| CYATHEALES               | 279    | 249.60-307.72 |      | 150.76 | 133.22-171.67 |
| <b>Thyrsopteridaceae</b> | 140.81 | 123.85-160.72 | n.a. |        | n.a.          |
| <i>Thyrsopteris</i>      | 140.81 | 123.85-160.72 | n.a. |        | n.a.          |
| <b>Loxsomataceae</b>     | 121.24 | 112.00-137.26 |      | 23.5   | 8.66-42.22    |
| <i>Loxsoma</i>           | 23.5   | 8.66-42.22    | n.a. |        | n.a.          |
| <i>Loxsomopsis</i>       | 23.5   | 8.66-42.22    | n.a. |        | n.a.          |
| <b>Culcitaceae</b>       | 62.89  | 34.77-95.55   |      | 14.54  | 4.21-28.85    |
| <i>Culcita</i>           | 62.89  | 34.77-95.55   |      | 14.54  | 4.21-28.85    |
| <b>Plagiogyriaceae</b>   | 62.89  | 34.77-95.55   |      | 31.89  | 15.99-50.50   |
| <i>Plagiogyria</i>       | 62.89  | 34.77-95.55   |      | 31.89  | 15.99-50.50   |
| <b>Cibotiaceae</b>       | 128.9  | 120.34-140.29 |      | 17.48  | 8.67-28.21    |
| <i>Cibotium</i>          | 128.9  | 120.34-140.29 |      | 17.48  | 8.67-28.21    |
| <b>Cyatheaceae</b>       | 132.06 | 125.00-142.80 |      | 30.28  | 21.65-41.12   |
| <i>Alsophila</i>         | 24.18  | 17.38-31.72   |      | 16.29  | 10.91-22.26   |
| <i>Cyathea</i>           | 24.18  | 17.38-31.72   |      | 14.43  | 9.63-19.49    |
| <i>Gymnosphaera</i>      | 26.47  | 19.07-34.80   |      | 16.61  | 9.30-24.25    |
| <i>Sphaeropteris</i>     | 30.28  | 21.65-41.12   |      | 27.15  | 17.69-37.01   |
| <b>Dicksoniaceae</b>     | 127.43 | 118.31-138.30 |      | 118.77 | 112.72-126.46 |

|                              |        |               |      |        |               |
|------------------------------|--------|---------------|------|--------|---------------|
| <i>Calochlaena</i>           | 118.77 | 112.72-126.46 |      | 26.66  | 9.83-50.65    |
| <i>Dicksonia</i>             | 115.94 | 112.00-122.86 |      | 10.1   | 2.95-20.13    |
| <i>Lophosoria</i>            | 115.94 | 112.00-122.86 | n.a. |        | n.a.          |
| <b>Metaxyaceae</b>           | 127.43 | 118.31-138.30 | n.a. |        | n.a.          |
| <i>Metaxya</i>               | 127.43 | 118.31-138.30 | n.a. |        | n.a.          |
| POLYPODIALES                 | 279    | 249.60-307.72 |      | 248.81 | 221.72-273.80 |
| <b>Lonchitidaceae</b>        | 182.43 | 155.69-211.48 | n.a. |        | n.a.          |
| <i>Lonchitis</i>             | 182.43 | 155.69-211.48 | n.a. |        | n.a.          |
| <b>Saccolomataceae</b>       | 235.21 | 208.09-262.00 |      | 15.16  | 5.77-27.39    |
| <i>Saccoloma</i>             | 235.21 | 208.09-262.00 |      | 15.16  | 5.77-27.39    |
| <b>Cystodiaceae</b>          | 221.07 | 194.15-248.43 | n.a. |        | n.a.          |
| <i>Cystodium</i>             | 221.07 | 194.15-248.43 | n.a. |        | n.a.          |
| <b>Lindsaeaceae</b>          | 182.43 | 155.69-211.48 |      | 127.49 | 106.54-150.87 |
| <i>Lindsaea</i>              | 65.51  | 52.99-79.27   |      | 44.22  | 32.28-56.23   |
| <i>Nesolindsaea</i>          | 40.98  | 29.24-52.95   | n.a. |        | n.a.          |
| <i>Odontosoria Old World</i> | 127.49 | 106.54-150.87 |      | 15.76  | 3.55-35.78    |
| <i>Odontosoria New World</i> | 79.91  | 64.93-95.64   | n.a. |        | n.a.          |
| <i>Osmolindsaea</i>          | 48.57  | 36.61-61.18   |      | 10.44  | 2.73-20.53    |
| <i>Sphenomeris</i>           | 71.25  | 57.63-86.04   | n.a. |        | n.a.          |
| <i>Tapeinidium</i>           | 40.98  | 29.24-52.95   |      | 20.32  | 11.50-29.69   |
| <i>Xyopteris</i>             |        | not included  |      |        |               |
| <b>Pteridaceae</b>           | 223.92 | 199.06-247.93 |      | 177.61 | 155.14-200.82 |
| CRYPTOGRAMMOIDEAE            | 161.03 | 136.24-186.88 |      | 79.99  | 49.15-115.07  |
| <i>Coniogramme</i>           | 58.7   | 33.00-88.65   |      | 21.72  | 7.73-38.82    |
| <i>Cryptogramma</i>          | 58.7   | 33.00-88.65   | n.a. |        | n.a.          |
| <i>Llavea</i>                | 79.99  | 49.15-115.07  | n.a. |        | n.a.          |
| PARKERIOIDEAE                | 161.03 | 136.24-186.88 |      | 144.2  | 119.48-169.89 |
| <i>Acrostichum</i>           | 80.44  | 56.56-106.23  |      | 38.85  | 18.04-61.85   |
| <i>Ceratopteris</i>          | 80.44  | 56.56-106.23  |      | 2.07   | 0.01-6.10     |
| PTERIDOIDEAE                 | 144.2  | 119.48-169.89 |      | 103.34 | 82.40-123.89  |
| <i>Actiniopteris</i>         | 41.39  | 17.48-70.26   | n.a. |        | n.a.          |
| <i>Anogramma</i>             | 17.8   | 3.28-37.25    | n.a. |        | n.a.          |
| <i>Austrogramme</i>          |        | not included  |      |        |               |
| <i>Cerosora</i>              |        | not included  |      |        |               |
| <i>Cosentinia</i>            |        | not included  |      |        |               |
| <i>Jamesonia</i>             | 57.67  | 42.02-73.47   |      | 25.86  | 14.69-38.39   |
| <i>Onychium</i>              | 41.39  | 17.48-70.26   | n.a. |        | n.a.          |
| <i>Pityrogramma</i>          | 40.46  | 23.01-58.89   |      | 8.83   | 1.83-18.71    |
| <i>Pteris</i>                | 103.34 | 82.40-123.89  |      | 89.01  | 61.35-114.47  |
| <i>Pterozonium</i>           | 29.94  | 11.97-50.65   | n.a. |        | n.a.          |

|                         |                            |               |      |                      |
|-------------------------|----------------------------|---------------|------|----------------------|
| <i>Syngamma</i>         | not included               |               |      |                      |
| <i>Taenitis</i>         | not included               |               |      |                      |
| <i>Tryonia</i>          | 57.37                      | 11.97-50.65   | n.a. | n.a.                 |
| CHEILANTHOIDEAE         | 156.11                     | 135.56-178.76 |      | 135.21 102.05-166.43 |
| <i>Adiantopsis</i>      | 31.99                      | 23.36-40.92   | n.a. | n.a.                 |
| <i>Aleuritopteris</i>   | 35                         | 21.52-48.05   |      | 25.71 12.22-39.18    |
| <i>Allosorus</i>        | 35                         | 21.52-48.05   | n.a. | n.a.                 |
| <i>Argyrochosma</i>     | 48.06                      | 34.35-62.37   |      | 29.35 15.31-44.23    |
| <i>Aspidotis</i>        | 32.37                      | 19.99-44.96   |      | 14.71 4.86-26.22     |
| <i>Astrolepis</i>       | not included               |               |      |                      |
| <i>Bommeria</i>         | 93.74                      | 71.05-119.26  |      | 26.98 7.24-53.85     |
| <i>Calciphlopteris</i>  | 135.21                     | 102.05-166.43 | n.a. | n.a.                 |
| <i>Cheilanthes</i>      | not monophyletic           |               |      |                      |
| <i>Cheiloplecton</i>    | 33.88                      | 23.37-45.22   | n.a. | n.a.                 |
| <i>Doryopteris</i>      | 24.88                      | 16.36-33.81   |      | 12.33 5.58-19.92     |
| <i>Gaga</i>             | 32.37                      | 19.99-44.96   | n.a. | n.a.                 |
| <i>Hemionitis</i>       | 23.07                      | 13.35-32.59   | n.a. | n.a.                 |
| <i>Lytoneuron</i>       | not included               |               |      |                      |
| <i>Mildella</i>         | 52.09                      | 36.00-68.56   | n.a. | n.a.                 |
| <i>Myriopteris</i>      | 52.09                      | 36.00-68.56   |      | 37.9 25.15-51.68     |
| <i>Notholaena</i>       | not monophyletic           |               |      |                      |
| <i>Ormopteris</i>       | 24.88                      | 16.36-33.81   | n.a. | n.a.                 |
| <i>Paragymnopteris</i>  | embedded in <i>Pellaea</i> |               |      |                      |
| <i>Parahemionitis</i>   | 23.07                      | 13.35-32.59   | n.a. | n.a.                 |
| <i>Pellaea</i>          | 48.06                      | 34.35-62.37   |      | 36.43 25.24-49.03    |
| <i>Pentagramma</i>      | 48.79                      | 38.11-60.28   | n.a. | n.a.                 |
| <i>Trachypteris</i>     | not included               |               |      |                      |
| VITTARIOIDEAE           | 156.11                     | 135.56-178.76 |      | 141.16 121.06-161.49 |
| <i>Adiantum</i>         | 141.16                     | 121.06-161.49 |      | 115.94 87.40-143.20  |
| <i>Ananthacorus</i>     | not included               |               |      |                      |
| <i>Antrophyum</i>       | 78.53                      | 63.03-94.54   | n.a. | n.a.                 |
| <i>Haplopteris</i>      | 67.61                      | 51.84-85.58   |      | 43.23 28.36-58.41    |
| <i>Hecistopteris</i>    | 44.58                      | 28.92-60.78   | n.a. | n.a.                 |
| <i>Polytaenium</i>      | 56.25                      | 41.73-70.48   |      | 34.31 21.63-47.95    |
| <i>Radiovittaria</i>    | 44.58                      | 28.92-60.78   | n.a. | n.a.                 |
| <i>Rheopteris</i>       | 103.51                     | 85.63-122.69  | n.a. | n.a.                 |
| <i>Scoliosorus</i>      | not included               |               |      |                      |
| <i>Vaginularia</i>      | not included               |               |      |                      |
| <i>Vittaria</i>         | 56.25                      | 41.73-70.48   |      | 23.71 10.38-37.92    |
| <b>Dennstaedtiaceae</b> | 213.89                     | 189.42-237.99 |      | 125.06 93.62-160.85  |

|                           |        |                                |      |                     |
|---------------------------|--------|--------------------------------|------|---------------------|
| <i>Blotiella</i>          | 37.57  | 20.76-55.51                    | n.a. | n.a.                |
| <i>Dennstaedtia</i>       | 56.08  | 37.47-74.75                    |      | 28.86 11.85-47.75   |
| <i>Histiopteris</i>       | 37.57  | 20.76-55.51                    | n.a. | n.a.                |
| <i>Hypolepis</i>          | 56     | 36.87-77.27                    | n.a. | n.a.                |
| <i>Leptolepia</i>         | 83.55  | 70.60-104.22                   |      | 30.25 11.24-53.26   |
| <i>Microlepia</i>         | 56.08  | 37.47-74.75                    |      | 16.36 8.30-26.14    |
| <i>Monachosorum</i>       | 102.19 | 70.61-136.78                   | n.a. | n.a.                |
| <i>Oenotrichia</i>        |        | not included                   |      |                     |
| <i>Paesia</i>             | 50.38  | 31.78-71.75                    | n.a. | n.a.                |
| <i>Pteridium</i>          | 61.69  | 40.42-84.38                    |      | 11.33 3.91-20.91    |
| <b>Cystopteridaceae</b>   | 91.53  | 53.17-133.49                   |      | 62.29 35.35-93.75   |
| <i>Acystopteris</i>       | 34.72  | 16.16-57.57                    |      | 12.89 1.26-30.67    |
| <i>Cystopteris</i>        | 34.72  | 16.16-57.57                    | n.a. | n.a.                |
| <i>Gymnocarpium</i>       | 62.29  | 35.35-93.75                    |      | 18.36 4.49-36.92    |
| <b>Hemidictyaceae</b>     | 137.04 | 114.28-161.35                  | n.a. | n.a.                |
| <i>Hemidictyum</i>        | 137.04 | 114.28-161.35                  | n.a. | n.a.                |
| <b>Aspleniaceae</b>       | 137.04 | 114.28-161.35                  |      | 104.15 85.96-123.03 |
| <i>Asplenium</i>          | 104.15 | 85.96-123.03                   |      | 82.59 68.93-97.47   |
| <i>Hymenasplenium</i>     | 104.15 | 85.96-123.03                   |      | 56.09 34.04-80.00   |
| <b>Diplaziopsidaceae</b>  | 91.53  | 53.17-133.49                   |      | 40.34 17.19-70.02   |
| <i>Diplaziopsis</i>       | 40.34  | 17.19-70.02                    | n.a. | n.a.                |
| <i>Homalosorus</i>        | 40.34  | 17.19-70.02                    | n.a. | n.a.                |
| <b>Desmophlebiaceae</b>   |        | not included                   |      |                     |
| <i>Desmophlebium</i>      |        | not included                   |      |                     |
| <b>Thelypteridaceae</b>   | 119.5  | 96.77-143.87                   |      | 89.91 70.73-110.68  |
| <b>PHEGOPTERIDOIDEAE</b>  | 89.91  | 70.43-110.68                   |      | 59.96 34.57-85.89   |
| <i>Macrothelypteris</i>   | 59.96  | 34.57-85.89                    | n.a. | n.a.                |
| <i>Phegopteris</i>        | 29.7   | 16.50-45.38                    |      | 16.51 6.62-28.10    |
| <i>Pseudophegopteris</i>  | 29.7   | 16.50-45.38                    |      | 15.41 3.64-29.79    |
| <b>THELYPTERIDOIDEAE</b>  | 89.91  | 70.43-110.68                   |      | 77.4 60.94-94.55    |
| <i>Amauropelta</i>        |        | embedded in <i>Thelypteris</i> |      |                     |
| <i>Amblovenatum</i>       |        | embedded in <i>Thelypteris</i> |      |                     |
| <i>Ampelopteris</i>       |        | not included                   |      |                     |
| <i>Chingia</i>            |        | embedded in <i>Thelypteris</i> |      |                     |
| <i>Christella</i>         |        | embedded in <i>Thelypteris</i> |      |                     |
| <i>Coryphopteris</i>      |        | embedded in <i>Thelypteris</i> |      |                     |
| <i>Cyclogramma</i>        |        | not included                   |      |                     |
| <i>Cyclosorus</i>         |        | embedded in <i>Thelypteris</i> |      |                     |
| <i>Glaphyopteridopsis</i> |        | embedded in <i>Thelypteris</i> |      |                     |
| <i>Goniopteris</i>        |        | embedded in <i>Thelypteris</i> |      |                     |

|                         |                                |      |       |             |
|-------------------------|--------------------------------|------|-------|-------------|
| <i>Meniscium</i>        | embedded in <i>Thelypteris</i> |      |       |             |
| <i>Menisorus</i>        | not included                   |      |       |             |
| <i>Mesophlebion</i>     | not included                   |      |       |             |
| <i>Mesopteris</i>       | not included                   |      |       |             |
| <i>Metathelypteris</i>  | embedded in <i>Thelypteris</i> |      |       |             |
| <i>Nannothelypteris</i> | not included                   |      |       |             |
| <i>Oreopteris</i>       | embedded in <i>Thelypteris</i> |      |       |             |
| <i>Parathelypteris</i>  | not included                   |      |       |             |
| <i>Plesioneuron</i>     | not included                   |      |       |             |
| <i>Pneumatopteris</i>   | embedded in <i>Thelypteris</i> |      |       |             |
| <i>Pronephrium</i>      | embedded in <i>Thelypteris</i> |      |       |             |
| <i>Pseudocyclosorus</i> | embedded in <i>Thelypteris</i> |      |       |             |
| <i>Sphaerostephanos</i> | embedded in <i>Thelypteris</i> |      |       |             |
| <i>Stenogramma</i>      | embedded in <i>Thelypteris</i> |      |       |             |
| <i>Steiropteris</i>     | embedded in <i>Thelypteris</i> |      |       |             |
| <i>Thelypteris</i>      | 89.91 70.43-110.68             |      | 77.4  | 60.94-94.55 |
| <i>Trigonospora</i>     | embedded in <i>Thelypteris</i> |      |       |             |
| <b>Woodsiaceae</b>      | 110.9 90.92-132.19             |      | 62.55 | 38.33-89.01 |
| <i>Woodsia</i>          | 110.9 90.92-132.19             |      | 62.55 | 38.33-89.01 |
| <b>Rhachidosoraceae</b> | 129.76 102.96-158.67           | n.a. |       | n.a.        |
| <i>Rhachidosorus</i>    | 129.76 102.96-158.67           | n.a. |       | n.a.        |
| <b>Onocleaceae</b>      | 91.75 76.40-107.94             |      | 66.46 | 55.80-79.43 |
| <i>Onoclea</i>          | 91.75 76.40-107.94             |      | 66.46 | 55.80-79.43 |
| <i>Onocleopsis</i>      | 42.24 16.84-63.74              | n.a. |       | n.a.        |
| <i>Matteuccia</i>       | 42.24 16.84-63.74              | n.a. |       | n.a.        |
| <b>Blechnaceae</b>      | 91.75 76.40-107.94             |      | 71.62 | 58.81-84.97 |
| STENOCHLAENOIDEAE       | 67.84 54.58-80.61              |      | 53.34 | 38.72-68.22 |
| <i>Salpichlaena</i>     | 53.34 38.72-68.22              |      | 13.1  | 4.09-21.51  |
| <i>Stenochlaena</i>     | 41.85 25.66-58.02              |      | 2.45  | 0.00-9.30   |
| <i>Telmatoblechnum</i>  | 41.85 25.66-58.02              | n.a. |       | n.a.        |
| WOODWARDIOIDEAE         | 71.62 58.81-84.97              |      | 46.72 | 29.81-63.02 |
| <i>Anchistea</i>        | embedded in <i>Woodwardia</i>  |      |       |             |
| <i>Lorinseria</i>       | embedded in <i>Woodwardia</i>  |      |       |             |
| <i>Woodwardia</i>       | 71.62 58.81-84.97              |      | 46.72 | 29.81-63.02 |
| BLECHNOIDEAE            | 67.84 54.58-80.61              |      | 57.93 | 44.85-71.66 |
| <i>Austroblechnum</i>   | embedded in <i>Blechnum</i>    |      |       |             |
| <i>Blechnidium</i>      | embedded in <i>Blechnum</i>    |      |       |             |
| <i>Blechnopsis</i>      | embedded in <i>Blechnum</i>    |      |       |             |
| <i>Blechnum</i>         | 67.84 54.58-80.61              |      | 57.93 | 44.85-71.66 |
| <i>Brainea</i>          | embedded in <i>Blechnum</i>    |      |       |             |

|                          |                               |               |        |              |
|--------------------------|-------------------------------|---------------|--------|--------------|
| <i>Cleistoblechnum</i>   | embedded in <i>Blechnum</i>   |               |        |              |
| <i>Cranfilia</i>         | embedded in <i>Blechnum</i>   |               |        |              |
| <i>Diploblechnum</i>     | embedded in <i>Blechnum</i>   |               |        |              |
| <i>Doodia</i>            | embedded in <i>Blechnum</i>   |               |        |              |
| <i>Icarus</i>            | embedded in <i>Blechnum</i>   |               |        |              |
| <i>Lomaria</i>           | embedded in <i>Blechnum</i>   |               |        |              |
| <i>Lomaridium</i>        | embedded in <i>Blechnum</i>   |               |        |              |
| <i>Lomariocycas</i>      | embedded in <i>Blechnum</i>   |               |        |              |
| <i>Neoblechnum</i>       | embedded in <i>Blechnum</i>   |               |        |              |
| <i>Oceaniopteris</i>     | embedded in <i>Blechnum</i>   |               |        |              |
| <i>Parablechnum</i>      | embedded in <i>Blechnum</i>   |               |        |              |
| <i>Sadleria</i>          | embedded in <i>Blechnum</i>   |               |        |              |
| <i>Struthiopteris</i>    | embedded in <i>Blechnum</i>   |               |        |              |
| <b>Athyriaceae</b>       | 105.23                        | 87.24-124.38  | 88.85  | 67.04-111.17 |
| <i>Athyrium</i>          | 74.29                         | 54.43-95.29   | 43.13  | 24.77-64.09  |
| <i>Deparia</i>           | 88.85                         | 67.04-111.17  | 27.5   | 11.64-46.84  |
| <i>Diplazium</i>         | 74.29                         | 54.43-95.29   | 48.17  | 33.27-65.02  |
| <b>Didymochlaenaceae</b> | 144.01                        | 99.99-175.90  | n.a.   | n.a.         |
| <i>Didymochlaena</i>     | 144.01                        | 99.99-175.90  | n.a.   | n.a.         |
| <b>Hypodematiaceae</b>   | 144.01                        | 99.99-175.90  | 72.68  | 30.37-123.07 |
| <i>Hypodematium</i>      | 72.68                         | 30.37-123.07  | n.a.   | n.a.         |
| <i>Leucostegia</i>       | 72.68                         | 30.37-123.07  | 15.67  | 3.87-33.46   |
| <b>Dryopteridaceae</b>   | 152.29                        | 131.84-172.99 | 122.02 | 99.29-144.76 |
| <i>Aenigmopteris</i>     | not included                  |               |        |              |
| <i>Dryopolystichum</i>   | not included                  |               |        |              |
| <b>DRYOPTERIDOIDEAE</b>  | 111.58                        | 86.61-135.14  | 98.81  | 75.55-122.53 |
| <i>Arachniodes</i>       | 77.2                          | 56.74-97.75   | 50.99  | 35.80-67.38  |
| <i>Ctenitis</i>          | 76.9                          | 56.42-99.00   | 37.49  | 22.18-54.19  |
| <i>Cyrtomium</i>         | 39.56                         | 29.09-50.57   | 15.66  | 6.95-25.23   |
| <i>Dryopteris</i>        | 77.2                          | 56.74-97.75   | 45.82  | 33.49-59.02  |
| <i>Phanerophlebia</i>    | 48.63                         | 35.48-63.12   | n.a.   | n.a.         |
| <i>Polystichum</i>       | 39.56                         | 29.09-50.57   | 34.95  | 25.49-44.86  |
| <b>POLYBOTRYOIDEAE</b>   | 111.58                        | 86.61-135.14  | 95.57  | 62.98-127.00 |
| <i>Cyclodium</i>         | embedded in <i>Polybotrya</i> |               |        |              |
| <i>Maxonia</i>           | 31.83                         | 19.62-46.00   | n.a.   | n.a.         |
| <i>Olfersia</i>          | embedded in <i>Polybotrya</i> |               |        |              |
| <i>Polybotrya</i>        | 31.83                         | 19.62-46.00   | 27.73  | 17.26-39.57  |
| <i>Polystichopsis</i>    | 73.34                         | 43.70-105.09  | n.a.   | n.a.         |
| <i>Stigmatopteris</i>    | 95.57                         | 62.98-127.00  | 14.58  | 4.38-29.09   |
| <i>Trichoneuron</i>      | not included                  |               |        |              |

|                         |        |                              |      |        |              |
|-------------------------|--------|------------------------------|------|--------|--------------|
| ELAPHOGLOSSOIDEAE       | 122.02 | 99.29-144.76                 |      | 98.53  | 78.53-119.71 |
| <i>Arthrobotrya</i>     |        | not included                 |      |        |              |
| <i>Bolbitis</i>         | 70     | 54.80-85.44                  |      | 42.82  | 24.93-61.84  |
| <i>Elaphoglossum</i>    | 58.83  | 45.95-72.27                  |      | 46.67  | 35.72-58.67  |
| <i>Lastreopsis</i>      | 49.08  | 25.96-73.53                  |      | 32.27  | 11.60-56.05  |
| <i>Lomagramma</i>       | 40.74  | 19.56-61.27                  | n.a. |        | n.a.         |
| <i>Megalastrum</i>      | 36.81  | 17.28-59.41                  | n.a. |        | n.a.         |
| <i>Mickelia</i>         | 58.83  | 45.95-72.27                  |      | 45.34  | 29.16-61.80  |
| <i>Parapolystichum</i>  | 80.18  | 48.75-108.96                 |      | 23.38  | 7.50-45.52   |
| <i>Pleocnemia</i>       | 91.02  | 72.02-111.37                 | n.a. |        | n.a.         |
| <i>Rumohra</i>          | 36.81  | 17.28-59.41                  | n.a. |        | n.a.         |
| <i>Teratophyllum</i>    | 40.74  | 19.56-61.27                  | n.a. |        | n.a.         |
| <b>Lomariopsidaceae</b> | 134.71 | 114.80-155.38                |      | 99.13  | 73.79-124.14 |
| <i>Cyclopeltis</i>      | 99.13  | 73.79-124.14                 |      | 26.39  | 8.92-50.50   |
| <i>Dracoglossum</i>     | 78.4   | 55.19-102.75                 | n.a. |        | n.a.         |
| <i>Lomariopsis</i>      | 78.4   | 55.19-102.75                 |      | 29.03  | 17.45-41.59  |
| <i>Thysanosoria</i>     |        | not included                 |      |        |              |
| <b>Nephrolepidaceae</b> | 134.71 | 114.80-155.38                |      | 61.62  | 32.40-95.12  |
| <i>Nephrolepis</i>      | 134.71 | 114.80-155.38                |      | 61.62  | 32.40-95.12  |
| <b>Tectariaceae</b>     | 119.39 | 103.22-135.80                |      | 97.99  | 69.33-122.48 |
| <i>Arthropteris</i>     | 97.99  | 69.33-122.48                 |      | 39.17  | 15.68-67.16  |
| <i>Draconopteris</i>    |        | not included                 |      |        |              |
| <i>Hypoderris</i>       |        | not included                 |      |        |              |
| <i>Malaiifilix</i>      |        | not included                 |      |        |              |
| <i>Pteridrys</i>        | 83.43  | 58.37-108.82                 | n.a. |        | n.a.         |
| <i>Tectaria</i>         | 66.78  | 46.21-89.61                  |      | 44.48  | 31.31-60.06  |
| <i>Triplophyllum</i>    | 66.78  | 46.21-89.61                  | n.a. |        | n.a.         |
| <b>Oleandraceae</b>     | 114.36 | 98.64-129.78                 |      | 32.05  | 5.63-80.22   |
| <i>Oleandra</i>         | 114.36 | 98.64-129.78                 |      | 32.05  | 5.63-80.22   |
| <b>Davalliaceae</b>     | 108.91 | 94.53-123.99                 |      | 63.11  | 41.19-88.53  |
| <i>Davallia</i>         | 108.91 | 94.53-123.99                 |      | 63.11  | 41.19-88.53  |
| <b>Polypodiaceae</b>    | 108.91 | 94.53-123.99                 |      | 101.47 | 87.48-114.93 |
| LOXOGRAMMOIDEAE         | 101.47 | 87.48-114.93                 |      | 73.77  | 55.16-91.40  |
| <i>Dictymia</i>         | 73.77  | 55.16-91.40                  |      | 27.43  | 8.73-50.81   |
| <i>Loxogramme</i>       | 73.77  | 55.16-91.40                  |      | 45.55  | 29.41-63.48  |
| DRYNARIOIDEAE           | 90.1   | 77.99-102.13                 |      | 67.17  | 39.70-93.39  |
| <i>Aglaomorpha</i>      | 59.65  | 37.55-86.72                  |      | 40.17  | 25.30-57.70  |
| <i>Arthromeris</i>      | 28.11  | 17.42-39.52                  |      | 12.07  | 2.97-23.37   |
| <i>Gymnogrammitis</i>   |        | embedded in <i>Selliguea</i> |      |        |              |
| <i>Paraselliguea</i>    |        | not included                 |      |        |              |



|                          |                                |              |       |             |
|--------------------------|--------------------------------|--------------|-------|-------------|
| <i>Phymatopteris</i>     | not included                   |              |       |             |
| <i>Polypodiopteris</i>   | embedded in <i>Selliguea</i>   |              |       |             |
| <i>Selliguea</i>         | 28.11                          | 17.42-39.52  | 25.96 | 16.27-36.49 |
| PLATYCERIOIDEAE          | 84.17                          | 72.04-96.46  | 71.5  | 58.82-84.72 |
| <i>Platycterium</i>      | 71.5                           | 58.82-84.72  | 46.68 | 35.46-61.96 |
| <i>Pyrrosia</i>          | 71.5                           | 58.82-84.72  | 49.04 | 35.86-62.84 |
| MICROSOROIDEAE           | 84.17                          | 72.04-96.46  | 72.8  | 60.90-85.12 |
| <i>Dendroconche</i>      | not included                   |              |       |             |
| <i>Goniophlebium</i>     | 66.26                          | 54.85-77.38  | 43.18 | 26.75-59.79 |
| <i>Kaulinia</i>          | not included                   |              |       |             |
| <i>Kontumia</i>          | not included                   |              |       |             |
| <i>Lecanopteris</i>      | embedded in <i>Microsorium</i> |              |       |             |
| <i>Lemmaphyllum</i>      | 32.23                          | 22.83-41.64  | 17.55 | 8.56-27.34  |
| <i>Lepidomicrosorium</i> | 17.76                          | 9.59-26.80   | 10.85 | 4.76-17.69  |
| <i>Lepisorus</i>         | 42.48                          | 33.41-51.66  | 37.92 | 28.61-47.18 |
| <i>Leptochilus</i>       | 37.47                          | 27.51-48.14  | 30.43 | 21.33-39.76 |
| <i>Microsorium</i>       | 66.26                          | 54.85-77.38  | 64.25 | 53.52-75.21 |
| <i>Neocheiropteris</i>   | 17.76                          | 9.59-26.80   | n.a.  | n.a.        |
| <i>Neolepisorus</i>      | 27.64                          | 18.86-36.80  | 19.71 | 11.23-29.08 |
| <i>Paragramma</i>        | 46.4                           | 5.69-21.29   | n.a.  | n.a.        |
| <i>Podosorus</i>         | not included                   |              |       |             |
| <i>Thylacopteris</i>     | 72.8                           | 60.90-85.12  | n.a.  | n.a.        |
| <i>Tricholepidium</i>    | 22.67                          | 13.51-32.20  | n.a.  | n.a.        |
| POLYPODIOIDEAE           | 89.49                          | 77.57-101.49 | 87.08 | 75.59-98.92 |
| <i>Acrosorus</i>         | not included                   |              |       |             |
| <i>Adenophorus</i>       | 45.35                          | 34.19-57.09  | 31.38 | 20.92-43.10 |
| <i>Alansmia</i>          | 49.18                          | 36.23-61.96  | 22.39 | 9.46-36.99  |
| <i>Archigrammitis</i>    | not included                   |              |       |             |
| <i>Ascogrammitis</i>     | 52.05                          | 43.68-60.77  | 35.52 | 24.10-47.22 |
| <i>Calymmodon</i>        | 39.4                           | 29.36-49.51  | 23.36 | 12.35-35.16 |
| <i>Campyloneurum</i>     | 68.11                          | 47.82-86.77  | 37.55 | 20.87-57.80 |
| <i>Ceradenia</i>         | 42.27                          | 29.73-54.62  | 32.35 | 20.86-44.57 |
| <i>Chrysogrammitis</i>   | 47.29                          | 37.25-57.04  | n.a.  | n.a.        |
| <i>Cochlidium</i>        | 36.37                          | 25.25-48.10  | 25.4  | 15.34-36.66 |
| <i>Ctenopterella</i>     | not included                   |              |       |             |
| <i>Ctenopteris</i>       | not monophyletic               |              |       |             |
| <i>Dasygrammitis</i>     | not included                   |              |       |             |
| <i>Enterosora</i>        | not monophyletic               |              |       |             |
| <i>Galactodenia</i>      | 42.77                          | 34.52-50.98  | n.a.  | n.a.        |
| <i>Grammitis</i>         | 36.37                          | 25.25-48.10  | 28.03 | 15.89-40.49 |

|                                  |       |                              |      |       |             |
|----------------------------------|-------|------------------------------|------|-------|-------------|
| <i>Lellingeria</i>               | 38.02 | 30.26-45.64                  |      | 32.57 | 24.91-40.58 |
| <i>Leucostrichum</i>             | 49.18 | 36.23-61.96                  |      | 31.11 | 18.85-44.47 |
| <i>Lomaphlebia</i>               |       | not included                 |      |       |             |
| <i>Luisma</i>                    |       | not included                 |      |       |             |
| <i>Melpomene</i>                 | 36.15 | 28.14-43.80                  |      | 26.95 | 15.53-37.78 |
| <i>Microgramma</i>               | 77.37 | 60.78-92.21                  |      | 45.68 | 30.42-62.98 |
| <i>Micropolypodium</i>           |       | not included                 |      |       |             |
| <i>Moranopteris</i>              | 47.29 | 37.25-57.04                  |      | 25.7  | 15.93-36.35 |
| <i>Mycopteris</i>                | 45.03 | 36.66-53.27                  |      | 30.06 | 18.11-42.49 |
| <i>Niphidium</i>                 | 68.11 | 47.82-86.77                  | n.a. |       | n.a.        |
| <i>Notogrammitis</i>             | 32.39 | 18.76-40.54                  |      | 21.53 | 11.84-32.06 |
| <i>Oreogrammitis</i>             |       | not monophyletic             |      |       |             |
| <i>Pecluma</i>                   | 62.91 | 44.95-80.11                  |      | 43.26 | 29.29-58.73 |
| <i>Phlebodium</i>                | 62.91 | 44.95-80.11                  |      | 18.69 | 3.77-41.45  |
| <i>Pleopeltis</i>                | 72.88 | 53.68-88.90                  |      | 35.65 | 24.37-49.00 |
| <i>Pleurosoriopsis</i>           | 49.08 | 27.17-75.18                  | n.a. |       | n.a.        |
| <i>Polypodium</i>                | 49.08 | 27.17-75.18                  |      | 36.47 | 20.41-54.17 |
| <i>Prosaptia</i>                 | 20.86 | 12.92-29.40                  |      | 9.99  | 4.81-15.90  |
| <i>Radiogrammitis</i>            |       | not monophyletic             |      |       |             |
| <i>Scleroglossum</i>             | 31.78 | 19.91-43.99                  | n.a. |       | n.a.        |
| <i>Serpocaulon</i>               | 69.32 | 47.88-87.53                  |      | 44.5  | 29.26-60.95 |
| <i>Stenogrammitis</i>            | 36.15 | 28.14-43.80                  |      | 24    | 16.59-31.69 |
| <i>Synammia</i>                  | 67.17 | 39.70-93.39                  |      | 10.55 | 1.28-24.98  |
| <i>Terpsichore</i>               | 67.77 | 58.32-77.15                  |      | 37    | 19.86-54.17 |
| <i>Themelium</i>                 | 16.07 | 5.33-28.40                   | n.a. |       | n.a.        |
| <i>Tomophyllum</i>               |       | embedded in <i>Grammitis</i> |      |       |             |
| <i>Unnamed genus<sup>1</sup></i> | 69.32 | 47.88-87.53                  | n.a. |       | n.a.        |
| <i>Xiphopterella</i>             |       | not included                 |      |       |             |
| <i>Zygophlebia</i>               |       | not included                 |      |       |             |

Ma=millions of years

HPD=highest posterior density

<sup>1</sup>*Polypodium chrysolepis* Hook. is not resolved as a member of any named genus, but as a sister lineage to *Serpocaulon*.

### Supplementary Table 3. Minimum divergence incongruence metrics.

| Taxon              | Fossil estimate<br>95% CI |        | Molecular min-<br>max estimate |        | MDI |
|--------------------|---------------------------|--------|--------------------------------|--------|-----|
| <i>Acrostichum</i> | 67.84                     | 75.78  | 18.04                          | 106.23 | 0   |
| <i>Adiantum</i>    | 114.15                    | 139.20 | 87.40                          | 161.49 | 0   |
| <i>Alsophila</i>   | 2.64                      | 53.15  | 10.91                          | 31.72  | 0   |

|                      |        |        |         |        |         |
|----------------------|--------|--------|---------|--------|---------|
| <i>Anemia</i>        | 131.13 | 146.54 | 136.00  | 222.54 | 0       |
| <i>Angiopteris</i>   | 208.94 | 247.17 | 0.06    | 198.04 | -10.9   |
| <i>Anogramma</i>     | 2.65   | 15.90  | <3.28   | 37.25  | 0       |
| <i>Antrophyum</i>    | 19.82  | 35.64  | <63.03  | 94.54  | n.a.    |
| <i>Arthropteris</i>  | 1.83   | 42.68  | 15.68   | 122.48 | 0       |
| <i>Asplenium</i>     | 228.85 | 242.56 | 68.93   | 123.03 | -105.82 |
| <i>Athyrium</i>      | 127.85 | 199.84 | 24.77   | 95.29  | -32.56  |
| <i>Azolla</i>        | 99.47  | 145.32 | 34.91   | 130.34 | 0       |
| <i>Blechnum</i>      | 141.00 | 163.04 | 44.85   | 80.61  | -60.39  |
| <i>Botrychium</i>    | 57.87  | 110.55 | 27.25   | 187.78 | 0       |
| <i>Ceratopteris</i>  | 34.59  | 94.73  | 0.01    | 106.23 | 0       |
| <i>Cibotium</i>      | 66.95  | 143.19 | 8.67    | 140.29 | 0       |
| <i>Coniogramme</i>   | 5.56   | 83.58  | 7.73    | 88.65  | 0       |
| <i>Ctenitis</i>      | 2.70   | 23.17  | 22.18   | 99.00  | 0       |
| <i>Cyathea</i>       | 203.47 | 239.62 | 9.63    | 31.72  | -171.75 |
| <i>Danaea</i>        | 35.45  | 128.24 | 17.29   | 203.20 | 0       |
| <i>Davallia</i>      | 37.12  | 72.57  | 26.26   | 53.00  | 0       |
| <i>Dennstaedtia</i>  | 161.69 | 190.77 | 11.85   | 74.75  | -86.94  |
| <i>Deparia</i>       | 5.36   | 47.31  | 11.64   | 111.17 | 0       |
| <i>Dicksonia</i>     | 192.10 | 215.19 | 2.95    | 122.86 | -69.24  |
| <i>Dicranopteris</i> | 81.37  | 97.97  | <14.24  | 54.56  | -26.81  |
| <i>Diplazium</i>     | 34.81  | 134.93 | 33.27   | 95.29  | 0       |
| <i>Drynaria</i>      | 6.26   | 25.78  | 25.3    | 86.72  | 0       |
| <i>Dryopteris</i>    | 164.55 | 180.63 | 33.49   | 97.75  | -66.8   |
| <i>Elaphoglossum</i> | 15.51  | 88.12  | 35.72   | 72.27  | 0       |
| <i>Equisetum</i>     | 324.72 | 359.39 | 50.87   | 465.97 | 0       |
| <i>Gleichenia</i>    | 174.42 | 182.67 | <89.30  | 107.47 | -66.95  |
| <i>Grammitis</i>     | 15.32  | 39.13  | 15.89   | 48.10  | 0       |
| <i>Hemionitis</i>    | 57.77  | 123.27 | 13.35   | 45.17  | -12.6   |
| <i>Histiopteris</i>  | 28.79  | 46.81  | <20.76  | 55.51  | 0       |
| <i>Hymenophyllum</i> | 85.95  | 106.37 | 35.92   | 255.40 | 0       |
| <i>Hypolepis</i>     | 16.15  | 33.99  | <36.87  | 77.27  | 0       |
| <i>Lastreopsis</i>   | 2.64   | 54.64  | 11.6    | 73.53  | 0       |
| <i>Lepisorus</i>     | 28.70  | 52.09  | 28.61   | 51.66  | 0       |
| <i>Leptolepia</i>    | 0.06   | 36.88  | 11.24   | 104.22 | 0       |
| <i>Leptopteris</i>   | 28.78  | 47.36  | 2.44    | 191.72 | 0       |
| <i>Lindsaea</i>      | 34.07  | 50.81  | 32.28   | 79.27  | 0       |
| <i>Lophosoria</i>    | 112.7  | 222.62 | <112.00 | 122.86 | 0       |
| <i>Lygodium</i>      | 81.89  | 144.86 | 23.31   | 287.39 | 0       |
| <i>Marattia</i>      | 214.15 | 242.05 | <172.00 | 198.04 | -16.11  |

|                     |        |        |         |        |         |
|---------------------|--------|--------|---------|--------|---------|
| <i>Marsilea</i>     | 178.21 | 210.06 | 18.17   | 125.22 | -52.99  |
| <i>Matonia</i>      | 179.88 | 242.22 | <49.83  | 149.11 | -30.77  |
| <i>Microsorium</i>  | 37.70  | 57.46  | 53.52   | 77.38  | 0       |
| <i>Nephrolepis</i>  | 5.39   | 17.68  | 32.40   | 155.38 | 14.72   |
| <i>Oleandra</i>     | 119.57 | 152.44 | 5.63    | 129.78 | 0       |
| <i>Onoclea</i>      | 94.05  | 141.68 | 55.8    | 107.94 | 0       |
| <i>Ophioglossum</i> | 16.41  | 36.39  | 41.38   | 159.10 | 4.99    |
| <i>Osmunda</i>      | 203.94 | 236.93 | 201.60  | 243.87 | 0       |
| <i>Osmundastrum</i> | 40.67  | 133.15 | 1.12    | 270.38 | 0       |
| <i>Paesia</i>       | 34.17  | 50.31  | <31.78  | 71.75  | 0       |
| <i>Pellaea</i>      | 1.81   | 40.94  | 25.24   | 62.37  | 0       |
| <i>Pilularia</i>    | 66.22  | 123.21 | 2.39    | 101.25 | 0       |
| <i>Pleopeltis</i>   | 16.11  | 91.51  | 24.37   | 88.90  | 0       |
| <i>Polypodium</i>   | 34.18  | 72.69  | 20.41   | 75.18  | 0       |
| <i>Polystichum</i>  | 65.63  | 108.17 | 35.48   | 99.00  | 0       |
| <i>Psilotum</i>     | 16.09  | 87.40  | <23.40  | 91.76  | 0       |
| <i>Pteridium</i>    | 33.98  | 40.91  | 3.91    | 84.38  | 0       |
| <i>Pteris</i>       | 95.61  | 104.76 | 61.35   | 123.89 | 0       |
| <i>Pyrrosia</i>     | 3.64   | 9.20   | 35.86   | 84.72  | 26.66   |
| <i>Regnellidium</i> | 83.83  | 142.19 | <83.50  | 101.25 | 0       |
| <i>Rumohra</i>      | 34.46  | 66.21  | <17.28  | 59.41  | 0       |
| <i>Saccoloma</i>    | 94.76  | 114.88 | 5.77    | 262.00 | 0       |
| <i>Salpichlaena</i> | 74.39  | 84.41  | 4.09    | 68.22  | -6.17   |
| <i>Salvinia</i>     | 69.34  | 98.97  | 29.85   | 130.34 | 0       |
| <i>Schizaea</i>     | 56.05  | 75.90  | 15.59   | 133.42 | 0       |
| <i>Sticherus</i>    | 66.10  | 117.16 | 37.80   | 129.08 | 0       |
| <i>Tectaria</i>     | 123.91 | 151.61 | 31.31   | 89.61  | -34.3   |
| <i>Thelypteris</i>  | 66.42  | 85.21  | 60.94   | 110.68 | 0       |
| <i>Thyrsopteris</i> | 304.41 | 372.07 | <123.85 | 160.72 | -143.69 |
| <i>Tmesipteris</i>  | 28.57  | 51.13  | <23.40  | 91.76  | 0       |
| <i>Todea</i>        | 172.31 | 235.79 | <136.00 | 191.72 | 0       |
| <i>Trichomanes</i>  | 66.77  | 116.20 | 73.34   | 185.83 | 0       |
| <i>Woodwardia</i>   | 97.58  | 145.22 | 29.81   | 84.97  | -12.61  |

Origination and extinction times as estimated from fossil record with PyRate compared with molecular estimates (min=upper 95% CI estimate of the crown group, max=lower 95% CI estimate of the stem group) and their MDI incogruence metric.

**Supplementary Table 4. Baseline origination and extinction rates ( $\lambda_0$  and  $\mu_0$ ) and correlation parameters.**

| Parameter                                   |             | Linear model |         |        | Exponential model |         |        |
|---------------------------------------------|-------------|--------------|---------|--------|-------------------|---------|--------|
|                                             |             | Mean         | 95% HPD |        | Mean              | 95% HPD |        |
| <b>Baseline rates</b>                       | $\lambda_0$ | 0.019        | 0.001   | 0.043  | 0.103             | 0.005   | 0.276  |
|                                             | $\mu_0$     | 0.015        | 0.002   | 0.032  | 0.014             | 0       | 0.053  |
| <b>Correlation parameters (origination)</b> | G_0         | -1.759       | -5.264  | 0.714  | -2.414            | -4.35   | 0.041  |
|                                             | G_1         | -0.057       | -1.62   | 1.299  | 0.012             | -1.008  | 1.002  |
|                                             | G_2         | -0.609       | -2.856  | 1.05   | 0.143             | -0.467  | 0.891  |
|                                             | G_3         | 0.919        | -0.789  | 3.816  | -0.084            | -1.102  | 0.825  |
|                                             | G_4         | -0.986       | -4.603  | 0.982  | -0.41             | -1.648  | 0.47   |
|                                             | G_5         | 2.005        | -1.1    | 8.799  | 1.822             | -0.053  | 3.635  |
|                                             | G_6         | -0.653       | -3.428  | 0.931  | 0.549             | -0.575  | 2.237  |
|                                             | G_7         | 0.299        | -1.001  | 2.055  | -0.646            | -1.969  | 0.364  |
|                                             | G_8         | 1.468        | -0.919  | 5.006  | 0.248             | -0.548  | 1.384  |
|                                             | G_9         | 0.656        | -0.992  | 3.029  | 0.068             | -0.896  | 1.149  |
|                                             | G_10        | -0.048       | -1.829  | 1.804  | -0.568            | -1.843  | 0.39   |
|                                             | G_11        | 0.257        | -1.59   | 2.54   | 0.007             | -1.334  | 1.359  |
|                                             | G_12        | -0.201       | -1.803  | 1.102  | -0.814            | -2.663  | 0.458  |
|                                             | G_13        | -0.202       | -1.969  | 1.146  | 0.28              | -0.771  | 1.722  |
|                                             | G_14        | 3.855        | -1.061  | 15.837 | -0.398            | -1.605  | 0.523  |
|                                             | G_15        | 1.583        | -1.038  | 7.377  | -0.141            | -1.69   | 1.032  |
| G_16                                        | 0.419       | -0.708       | 2.203   | 0.809  | -0.383            | 2.392   |        |
| <b>Correlation parameters (extinction)</b>  | H_0         | 1.29         | -0.91   | 5.709  | 1.174             | -0.531  | 3.661  |
|                                             | H_1         | -0.536       | -2.307  | 0.6    | -0.379            | -2.111  | 0.779  |
|                                             | H_2         | -0.038       | -1.22   | 1.025  | -1.088            | -2.391  | 0.133  |
|                                             | H_3         | -0.399       | -2.443  | 1.062  | -0.025            | -1.145  | 1.055  |
|                                             | H_4         | -0.221       | -1.769  | 1.145  | -1.365            | -3.253  | 0.265  |
|                                             | H_5         | 0.5          | -1.363  | 2.936  | 1.535             | -0.268  | 3.474  |
|                                             | H_6         | -4.193       | -10.495 | -0.592 | 1.586             | -0.228  | 3.283  |
|                                             | H_7         | -1.02        | -3.506  | 0.628  | 0.282             | -0.775  | 1.738  |
|                                             | H_8         | 2.365        | -0.535  | 6.292  | 0.216             | -0.984  | 1.779  |
|                                             | H_9         | 2.15         | -0.226  | 6.422  | 0.605             | -0.624  | 2.305  |
|                                             | H_10        | -1.234       | -4.776  | 0.588  | -1.004            | -2.572  | 0.187  |
|                                             | H_11        | 0.458        | -0.609  | 2.179  | 2.739             | 0.007   | 4.859  |
|                                             | H_12        | 0.316        | -1.4    | 2.468  | -3.307            | -5.895  | -0.814 |
|                                             | H_13        | -1.407       | -3.834  | 0.255  | 0.194             | -1.286  | 2.005  |
| H_14                                        | -0.682      | -2.533       | 0.775   | 0.822  | -0.528            | 2.95    |        |

|      |       |        |       |        |        |       |
|------|-------|--------|-------|--------|--------|-------|
| H_15 | 3.123 | -0.302 | 9.244 | -0.702 | -2.818 | 0.617 |
| H_16 | 0.472 | -0.937 | 2.29  | -0.304 | -1.898 | 0.917 |

The curves were numbered as follows: 0 fern diversity; 1 selenium concentration in marine sediments; 2 wet tropical biome extent; 3 cool temperate biome extent; 4 magmatic activity; 5 atmospheric CO<sub>2</sub>; 6 gymnosperm diversity; 7 angiosperm diversity; 8 warm temperate biome extent; 9 polar biome extent; 10 continental fragmentation; 11 arid biome extent; 12 atmospheric O<sub>2</sub>; 13 eustatic sea level; 14 diversity of lycophytes etc. (free sporing vascular plants excluding ferns); 15 global mean temperature; 16 mountain area.

**Supplementary Table 3. Shrinkage weights, based on local and global shrinkage parameters, and global shrinkage.**

| Parameter                              |         | Linear model |         |       | Exponential model |         |       |
|----------------------------------------|---------|--------------|---------|-------|-------------------|---------|-------|
|                                        |         | Mean         | 95% HPD |       | Mean              | 95% HPD |       |
| <b>Shrinkage weights (origination)</b> | w(G_0)  | <b>0.618</b> | 0.035   | 1     | <b>0.762</b>      | 0.299   | 1     |
|                                        | w(G_1)  | 0.289        | 0       | 0.923 | 0.269             | 0       | 0.864 |
|                                        | w(G_2)  | 0.378        | 0       | 0.957 | 0.252             | 0       | 0.842 |
|                                        | w(G_3)  | 0.452        | 0       | 0.971 | 0.28              | 0       | 0.881 |
|                                        | w(G_4)  | 0.412        | 0       | 0.976 | 0.332             | 0       | 0.899 |
|                                        | w(G_5)  | <b>0.515</b> | 0       | 0.992 | <b>0.68</b>       | 0.175   | 1     |
|                                        | w(G_6)  | 0.382        | 0       | 0.962 | 0.375             | 0       | 0.938 |
|                                        | w(G_7)  | 0.295        | 0       | 0.93  | 0.416             | 0       | 0.931 |
|                                        | w(G_8)  | <b>0.57</b>  | 0.026   | 1     | 0.297             | 0       | 0.877 |
|                                        | w(G_9)  | 0.4          | 0       | 0.959 | 0.286             | 0       | 0.879 |
|                                        | w(G_10) | 0.306        | 0       | 0.934 | 0.392             | 0       | 0.927 |
|                                        | w(G_11) | 0.33         | 0       | 0.95  | 0.31              | 0       | 0.898 |
|                                        | w(G_12) | 0.302        | 0       | 0.927 | 0.454             | 0       | 0.952 |
|                                        | w(G_13) | 0.309        | 0       | 0.931 | 0.319             | 0       | 0.897 |
|                                        | w(G_14) | <b>0.607</b> | 0.008   | 1     | 0.326             | 0       | 0.91  |
|                                        | w(G_15) | 0.456        | 0       | 0.988 | 0.313             | 0       | 0.905 |
| w(G_16)                                | 0.326   | 0            | 0.942   | 0.446 | 0                 | 0.95    |       |
| <b>Shrinkage weights (extinction)</b>  | w(H_0)  | 0.456        | 0       | 0.983 | <b>0.518</b>      | 0       | 0.972 |
|                                        | w(H_1)  | 0.353        | 0       | 0.946 | 0.351             | 0       | 0.923 |
|                                        | w(H_2)  | 0.282        | 0       | 0.91  | <b>0.537</b>      | 0       | 0.961 |
|                                        | w(H_3)  | 0.348        | 0       | 0.946 | 0.284             | 0       | 0.875 |
|                                        | w(H_4)  | 0.319        | 0       | 0.927 | 0.577             | 0       | 0.973 |
|                                        | w(H_5)  | 0.375        | 0       | 0.958 | 0.611             | 0.033   | 1     |
|                                        | w(H_6)  | <b>0.834</b> | 0.427   | 1     | <b>0.633</b>      | 0.039   | 1     |

|                         |              |       |       |              |       |       |       |
|-------------------------|--------------|-------|-------|--------------|-------|-------|-------|
| w(H_7)                  | 0.477        | 0     | 0.97  | 0.315        | 0     | 0.903 |       |
| w(H_8)                  | 0.69         | 0.102 | 1     | 0.322        | 0     | 0.905 |       |
| w(H_9)                  | 0.636        | 0.064 | 1     | 0.395        | 0     | 0.944 |       |
| w(H_10)                 | 0.488        | 0     | 0.981 | <b>0.511</b> | 0     | 0.961 |       |
| w(H_11)                 | 0.336        | 0     | 0.938 | <b>0.782</b> | 0.25  | 1     |       |
| w(H_12)                 | 0.364        | 0     | 0.943 | 0.84         | 0.487 | 1     |       |
| w(H_13)                 | <b>0.563</b> | 0.044 | 1     | 0.337        | 0     | 0.921 |       |
| w(H_14)                 | 0.426        | 0     | 0.954 | 0.448        | 0     | 0.959 |       |
| w(H_15)                 | <b>0.694</b> | 0.053 | 1     | 0.426        | 0     | 0.947 |       |
| w(H_16)                 | 0.352        | 0     | 0.947 | 0.346        | 0     | 0.92  |       |
| <b>Global shrinkage</b> | $\tau$       | 0.999 | 0.138 | 2.48         | 0.839 | 0.306 | 1.491 |

Shrinkage weights greater than 0.5 (highlighted in bold) indicate significant evidence for correlation (positive or negative depending on the respective G or H value). The curves were numbered as follows: 0 fern diversity; 1 selenium concentration in marine sediments; 2 extent of wet tropical biome; 3 extent of cool temperate biome; 4 magmatic activity; 5 atmospheric CO<sub>2</sub>; 6 gymnosperm diversity; 7 angiosperm diversity; 8 extent of warm temperate biome; 9 extent of polar biome; 10 continental fragmentation; 11 extent of arid biome; 12 atmospheric O<sub>2</sub>; 13 eustatic sea level; 14 diversity of lycophytes etc. (free sporing vascular plants excluding ferns); 15 global mean temperature; 16 mountain area.
